# Supplementary material for: Pentazadiene: a high-nitrogen linkage in energetic materials
Source: Royal Society of Chemistry journal article supplement (doi:10.1039/c6cc08179g), 2017-01-01
Supplement: c6cc08179g1.pdf [file c6cc08179g1.pdf]

# Supporting Information

## Pentazadiene: a high nitrogen linkage in energetic materials

*Qi Wang,<sup>a</sup> Fuqing Pang,<sup>a</sup> Guilong Wang,<sup>a</sup> Jinglun Huang,<sup>b</sup> Fude Nie<sup>b</sup> and Fu-Xue Chen<sup>\*a</sup>*

*a* School of Chemical Engineering & the Environment, Beijing Institute of Technology, 5 South Zhongguancun street, Haidian district, Beijing 100081, China. E-mail: fuxue.chen@bit.edu.cn.

*b* Institute of Chemical Materials, China Academy of Engineering Physics, Mianyang, 621050, Sichuan, China.

## Contents

|                                                     |     |
|-----------------------------------------------------|-----|
| 1. Further optimization of reaction condition ..... | S2  |
| 2. Investigations of mechanism.....                 | S4  |
| 2. General Experimental .....                       | S6  |
| 3. References .....                                 | S11 |
| 4. X-Ray Plots.....                                 | S12 |
| 5. Spectra Data.....                                | S14 |
| 6. X-Ray Tables.....                                | S55 |
| 7. Computation Details .....                        | S62 |

## Further optimization of reaction condition to synthesize **2a**

Besides EDCI and DCC, 1-[Bis(dimethylamino)methylene]-1*H*-1,2,3-triazolo[4,5-*b*]pyridinium 3-oxid hexafluorophosphate (HATU), another common condensation agent in the construction of amide bond, was utilized to activate **1a** (Table S1, entry 6). However, the product **2a** was not formed. Compared with DMAP, 1-hydroxybenzotriazole (HOBt) had no effect on this reaction (entries 3 and 5).

**Table S1.** Synthesis of **2a** in different activating conditions.<sup>a</sup>

| entry          | activating reagent (equiv.) | yield(%) <sup>b</sup> |
|----------------|-----------------------------|-----------------------|
| 1 <sup>c</sup> | DCC (0.6)                   | trace                 |
| 2 <sup>c</sup> | DCC (0.6), DMAP (0.2)       | 53                    |
| 3              | DCC (0.6), HOBt (0.6)       | 0                     |
| 4              | EDCI (0.6), DMAP (0.2)      | 56                    |
| 5              | EDCI (0.6), HOBt (0.6)      | 0                     |
| 6              | HATU (0.6), DIEA (1.0)      | 0                     |

<sup>a</sup> Reactions were carried out with tetrazolyl triazene (0.5 mmol), and activating reagent in CH<sub>2</sub>Cl<sub>2</sub> (5 mL) at room temperature. <sup>b</sup> Isolated yield. <sup>c</sup> 72 h.

In EDCI/DMAP condition, low polar solvent provided higher yield (Table S2, entries 1-7). The yield in chloroform was slightly higher than dichloromethane (entry 2). Without DMAP, the yields in most solvents were increasing, whereas no solvent exceeded dichloromethane (entries 9-13). The solution concentration had no effect on this reaction (entries 16-18), neither did extension of time (entries 19 and 20). The reaction was smoothly scaled up to 5.0 mmol, giving **2a** in a 74% yield.

**Table S2.** Synthesis of **2a** in different reaction conditions.<sup>a</sup>

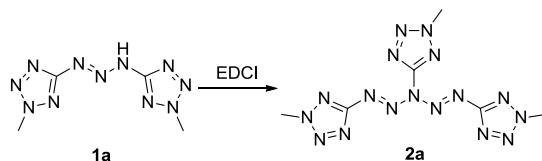

| entry           | EDCI (equiv.) | DMAP (equiv.) | solvent                         | conc. (M) | time (h) | yield (%) <sup>b</sup> |
|-----------------|---------------|---------------|---------------------------------|-----------|----------|------------------------|
| 1               | 0.6           | 0.2           | CH <sub>2</sub> Cl <sub>2</sub> | 0.1       | 24       | 56                     |
| 2               | 0.6           | 0.2           | CHCl <sub>3</sub>               | 0.1       | 24       | 60                     |
| 3               | 0.6           | 0.2           | DCE                             | 0.1       | 24       | 48                     |
| 4               | 0.6           | 0.2           | CH <sub>3</sub> CN              | 0.1       | 24       | 44                     |
| 5               | 0.6           | 0.2           | THF                             | 0.1       | 24       | 38                     |
| 6               | 0.6           | 0.2           | acetone                         | 0.1       | 24       | 35                     |
| 7               | 0.6           | 0.2           | DMF                             | 0.1       | 24       | n.r.                   |
| 8               | 0.6           | 0.6           | CH <sub>2</sub> Cl <sub>2</sub> | 0.1       | 24       | 21                     |
| 9               | 0.6           | 0             | CH <sub>2</sub> Cl <sub>2</sub> | 0.1       | 24       | 80                     |
| 10              | 0.6           | 0             | CHCl <sub>3</sub>               | 0.1       | 24       | 69                     |
| 11              | 0.6           | 0             | DCE                             | 0.1       | 24       | 65                     |
| 12              | 0.6           | 0             | CH <sub>3</sub> CN              | 0.1       | 24       | 50                     |
| 13              | 0.6           | 0             | THF                             | 0.1       | 24       | 38                     |
| 14 <sup>c</sup> | 0.5           | 0             | CH <sub>2</sub> Cl <sub>2</sub> | 0.1       | 24       | 65                     |
| 15              | 1.2           | 0             | CH <sub>2</sub> Cl <sub>2</sub> | 0.1       | 24       | 48                     |
| 16              | 0.6           | 0             | CH <sub>2</sub> Cl <sub>2</sub> | 0.05      | 24       | 78                     |
| 17              | 0.6           | 0             | CH <sub>2</sub> Cl <sub>2</sub> | 0.2       | 24       | 76                     |
| 18              | 0.6           | 0             | CH <sub>2</sub> Cl <sub>2</sub> | 0.5       | 24       | 78                     |
| 19              | 0.6           | 0             | CH <sub>2</sub> Cl <sub>2</sub> | 0.1       | 36       | 78                     |
| 20              | 0.6           | 0             | CH <sub>2</sub> Cl <sub>2</sub> | 0.1       | 48       | 78                     |
| 21 <sup>d</sup> | 0.6           | 0             | CH <sub>2</sub> Cl <sub>2</sub> | 0.1       | 24       | 74                     |

<sup>a</sup> Reactions were carried out with tetrazolyltriazene (0.5 mmol), and EDCI at room temperature. <sup>b</sup> Isolated yield. <sup>c</sup> 72 h. <sup>d</sup> On 5.0 mmol scale.

## Investigations of mechanism

When **1a** and **1f** were mixed of 1:1 ratio as starting material, cross-reacted product **2af** and **2fa** were not observed in mass spectrum (Scheme S1), which indicated that two molecules of triazenes forming pentaza-1,4-dienes connected with each other by intermolecular forces.

**Scheme S1.** Cross-reaction of two different substituted tetrazolyl triazenes

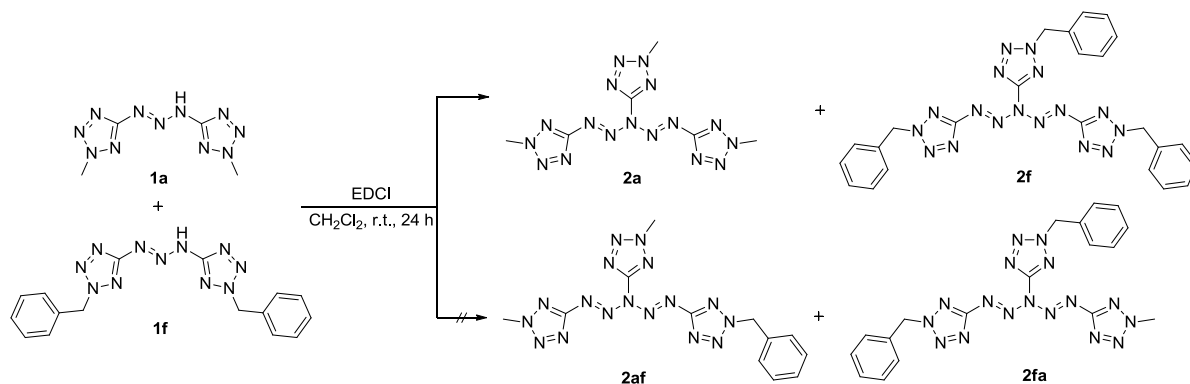

The dimer [**1a**] was observed in mass spectrum (Figure S1). In <sup>1</sup>H NMR spectra, the proton signal of amino in triazene employing CD<sub>2</sub>Cl<sub>2</sub> as solvent (Figure S2 upper) shift up field, compared with the signal employing DMSO-D<sub>6</sub> (Figure S2 lower). One of the reason is the hydrogen bonds in dimers (-N-H ··· N-) are weaker than the ones between **1a** and DMSO (-N-H ··· O-). Another reason might be strong shielding effect on inner hydrogens surrounded by two molecules in a dimer [**1a**]. The solvents forming strong hydrogen bonds with **1a** (Table S2, entry 4-6) provide lower yield of **2a**, which also implies that the dimer [**1a**] is the active species in this reaction.

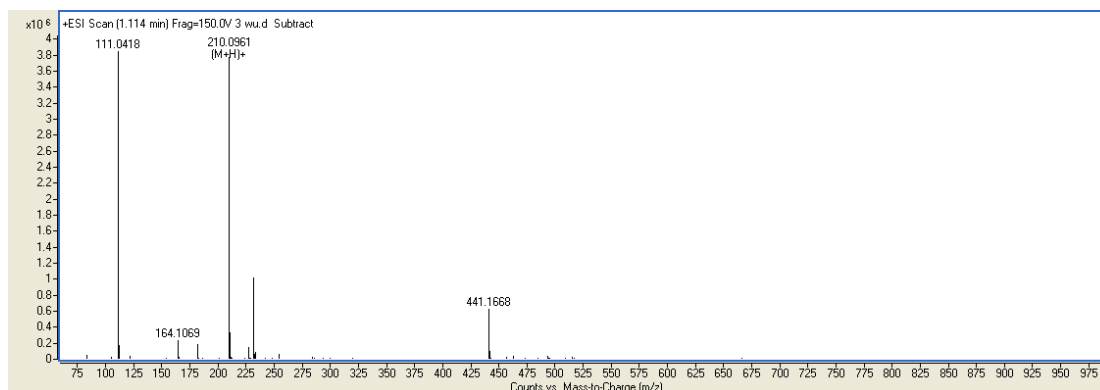

**Figure S1.** High resolution mass spectrum of **1a** and dimer [**1a**]

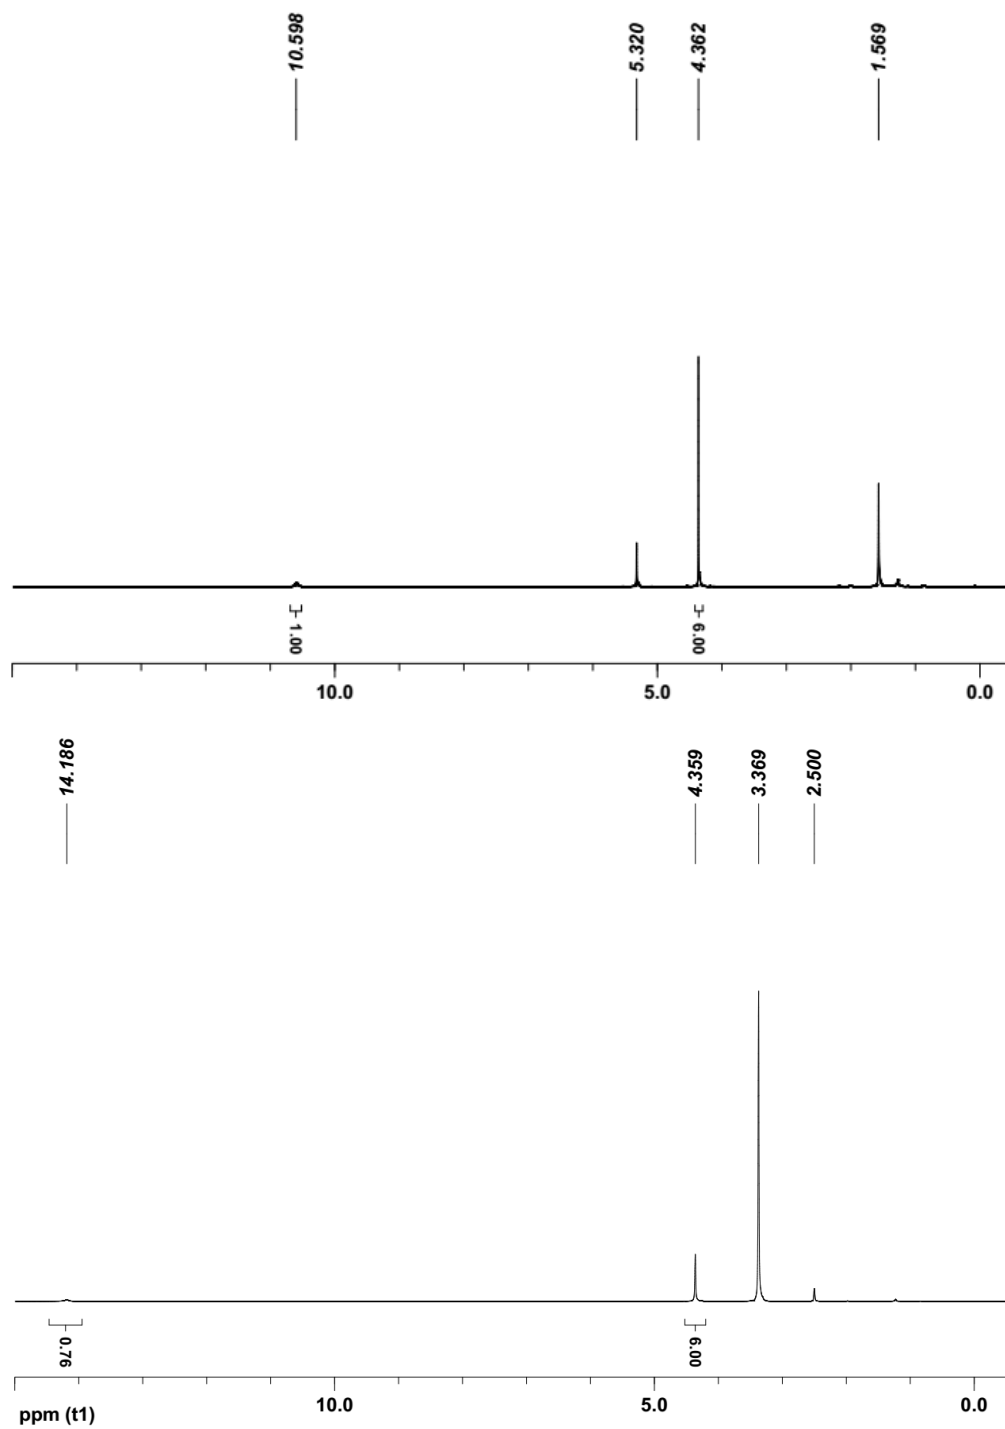

**Figure S2.** <sup>1</sup>H NMR spectra of **1a** in CD<sub>2</sub>Cl<sub>2</sub> (upper) and DMSO-D<sub>6</sub> (lower). The x axis represents the chemical shift  $\delta$  in ppm

**Caution!** Due to the fact that tetrazolyl pentazadienes are to some extent rather unstable toward external stimuli, proper safety precautions should be taken when handling the dry materials. Lab personnel and the equipment should be properly grounded and protective equipment such as leather coat, Kevlar gloves, ear protection and face shield are recommended.

**General Methods:**  $^1\text{H}$  and  $^{13}\text{C}$  NMR spectra were recorded on a 400 MHz (Bruker Avance 400) nuclear magnetic resonance spectrometers operating at 400 and 100 MHz, respectively, by using  $\text{CDCl}_3$ ,  $[\text{D}_6]\text{DMSO}$  and  $\text{CD}_3\text{CN}$  as solvent and locking solvent.  $^{15}\text{N}$  NMR spectra were recorded on a 700 MHz (Bruker Avance 700) nuclear magnetic resonance spectrometers operating at 70 MHz, respectively, by using  $\text{CD}_2\text{Cl}_2$  and DMF-D7 as solvent and locking solvent. IR spectra were recorded using KBr pellets for solids on a Bruker ALPHA FT-IR-Spektrometer. The melting and decomposition points were obtained on a differential scanning calorimeter (METTLER TOLEDO) at a scan rate of  $5\text{ }^\circ\text{C min}^{-1}$ . Elemental analyses were carried out using an Elementar Vario EL element analyzer. High resolution mass spectrometry was recorded on Bruker Apex IV FTMS. Details of the X-ray diffraction analysis of **2a** are presented. Data were collected on a Rigaku Saturn 724 CCD diffractometer employing graphite-monochromated MoK $\alpha$  radiation ( $\lambda=0.71073\text{ \AA}$ ) using omega scans.

**X-ray diffraction:** For compound **2a**, data were collected on a Rigaku Saturn 724 CCD diffractometer employing graphite-monochromated MoK $\alpha$  radiation ( $\lambda=0.71073\text{ \AA}$ ) using omega scans. Data collection and reduction were performed and the unit cell was initially refined using Crystal Clear SM Expert 2.0 r2.<sup>1</sup> The reflection data were corrected for Lorentz-polarization factors. The structure was solved by direct methods and refined by the least-squares method on  $F^2$  using the SHELXTL-97 suite of programs.<sup>2</sup> All non-hydrogen atoms were refined anisotropically. The structure of **2a** was solved in the space group  $P2_1/c$  by analysis of systematic absences.

Compound **1a** and **1j** were synthesized according as literature.<sup>3</sup>

### General procedure to synthesize substituted tetrazolyl triazene **1c-1h**

$\text{NaNO}_2$  (0.690 g, 10 mmol) in 40 mL water was added dropwise to a solution of 2-substituted-5-aminotetrazole (20 mmol) and concentrated HCl (4 mL, 48 mmol) in 100 mL water at  $0\text{ }^\circ\text{C}$ . After 2 h, the reaction stirred additional 2 h at room temperature. The precipitate was filtered, washed with water, and dried to provide high purity product.

In all the  $^{13}\text{C}$  NMR spectra of the tetrazolyl triazene, the carbon atom of tetrazole rings (165.4-169.0 ppm) were hard to be found due to the weak resonance, even not in **1b** and **1f**.

**1,3-bis(2-allyltetrazol-5-yl)triazene (1c).** Yield 2.195 g (84%) of product **1c**.

White solid (**1c**): m.p.  $50\text{-}52\text{ }^\circ\text{C}$ . IR (KBr):  $\tilde{\nu} = 3497, 3451, 2770, 1639, 1597, 1461, 1227, 1044, 930, 810, 557\text{ cm}^{-1}$ .  $^1\text{H}$  NMR (400 MHz,  $[\text{D}_6]\text{DMSO}$ ):  $\delta = 14.26$  (s, 1H), 6.07-6.14 (m, 2H), 5.31-5.36 (m, 8H) ppm.  $^{13}\text{C}$  NMR (100 MHz,  $[\text{D}_6]\text{DMSO}$ ):  $\delta = 168.8, 130.6, 120.3, 55.3$  ppm. HRMS: calc. for  $\text{C}_8\text{H}_{12}\text{N}_{11}$   $[\text{M}+\text{H}]^+$ : 262.1272; found:

262.1270.

**1,3-bis(2-tert-butyltetrazol-5-yl)triazene (1d).** Yield 2.442 g (83%) of product **1d**.

White solid (**1d**): m.p. 169-170 °C. IR (KBr):  $\tilde{\nu}$  = 3181, 3133, 2989, 2940, 1595, 1481, 1387, 1373, 1342, 1314, 1279, 1217, 1189, 1020, 941, 826, 760  $\text{cm}^{-1}$ .  $^1\text{H}$  NMR (400 MHz, [D6]DMSO):  $\delta$  = 14.10 (s, 1H), 1.69 (s, 18H) ppm.  $^{13}\text{C}$  NMR (100 MHz, [D6]DMSO):  $\delta$  = 168.2, 64.2, 28.6 ppm. HRMS: calc. for  $\text{C}_{10}\text{H}_{20}\text{N}_{11}$   $[\text{M}+\text{H}]^+$ : 294.1898; found: 294.1901.

**1,3-bis(2-bromoethyltetrazol-5-yl)triazene (1e).** Yield 3.522 g (89%) of product **1e**.

White solid (**1e**): m.p. 131-133 °C. IR (KBr):  $\tilde{\nu}$  = 3034, 2979, 2876, 1587, 1458, 1426, 1308, 1258, 1204, 1040, 959, 874, 744  $\text{cm}^{-1}$ .  $^1\text{H}$  NMR (400 MHz, [D6]DMSO):  $\delta$  = 14.34 (s, 1H), 5.14 (t,  $J=5.6$  Hz, 4H), 4.05 (t,  $J=5.6$  Hz, 4H) ppm.  $^{13}\text{C}$  NMR (100 MHz, [D6]DMSO):  $\delta$  = 169.0, 54.6, 29.9 ppm. HRMS: calc. for  $\text{C}_9\text{H}_{12}\text{Br}_3\text{N}_{17}$   $[\text{M}+\text{H}]^+$ : 395.9467; found: 395.9463.

**1,3-bis(2-methoxycarbonylmethyltetrazol-5-yl)triazene (1f).** Yield 2.695 g (83%) of product **1f**.

White solid (**1f**): m.p. 84-86 °C. IR (KBr):  $\tilde{\nu}$  = 3539, 3464, 3007, 2964, 1735, 1583, 1454, 1363, 1241, 1043, 986, 790, 738  $\text{cm}^{-1}$ .  $^1\text{H}$  NMR (400 MHz, [D6]DMSO):  $\delta$  = 14.45 (s, 1H), 5.86 (s, 4H), 3.75 (s, 6H) ppm.  $^{13}\text{C}$  NMR (100 MHz, [D6]DMSO):  $\delta$  = 166.4, 53.6, 52.9 ppm. HRMS: calc. for  $\text{C}_{12}\text{H}_{15}\text{N}_{17}\text{O}_6$   $[\text{M}+\text{H}]^+$ : 326.1068; found: 326.1067.

**1,3-bis(2-cyanomethyltetrazol-5-yl)triazene (1g).** Yield 2.241 g (86%) of product **1g**.

White solid (**1g**): m.p. 79-81 °C. IR (KBr):  $\tilde{\nu}$  = 3490, 3454, 2999, 1603, 1468, 1378, 1301, 1229, 1041, 936, 828, 776, 741  $\text{cm}^{-1}$ .  $^1\text{H}$  NMR (400 MHz, [D6]DMSO):  $\delta$  = 14.61 (s, 1H), 6.24 (s, 4H) ppm.  $^{13}\text{C}$  NMR (100 MHz, [D6]DMSO):  $\delta$  = 166.2, 113.4, 41.1 ppm. HRMS: calc. for  $\text{C}_9\text{H}_6\text{N}_{20}$   $[\text{M}+\text{H}]^+$ : 260.0864; found: 260.0864.

**1,3-bis(2-vinyltetrazol-5-yl)triazene (1h).** Yield 1.990 g (85%) of product **1h**.

White solid (**1h**): m.p. 157-158 °C (dec.). IR (KBr):  $\tilde{\nu}$  = 3180, 3135, 3018, 1600, 1488, 1386, 1328, 1228, 1196, 1010, 952, 936, 789, 722  $\text{cm}^{-1}$ .  $^1\text{H}$  NMR (400 MHz, [D6]DMSO):  $\delta$  = 14.45 (s, 1H), 7.77 (dd,  $J=15.4$ , 8.6 Hz, 2H), 6.09 (d,  $J=15.2$ , 2H), 5.49 (d,  $J=7.6$ , 2H) ppm.  $^{13}\text{C}$  NMR (100 MHz, [D6]DMSO):  $\delta$  = 165.4, 130.1, 109.2 ppm. HRMS: calc. for  $\text{C}_9\text{H}_9\text{N}_{17}$   $[\text{M}+\text{H}]^+$ : 234.0959; found: 234.0962.

**1,3-bis(2-benzyltetrazol-5-yl)triazene (1b).** Yield 2.007 g (55%) of product **1b**.

$\text{NaNO}_2$  (0.690 g, 10 mmol) in 20 mL water was added dropwise to a solution of 2-benzyl-5-aminotetrazole (3.504 g, 20 mmol) and concentrated HCl (4 mL, 48 mmol) in 40 mL water and 40 mL THF at 0 °C. After 2 h, the reaction stirred additional 2 h at room temperature. The precipitate was filtered, washed with water, and dried to provide high purity product.

White solid (**1b**): m.p. 66-68 °C. IR (KBr):  $\tilde{\nu}$  = 3535, 3474, 1602, 1466, 1225, 1034, 824, 744, 716  $\text{cm}^{-1}$ .  $^1\text{H}$  NMR (400 MHz, [D<sub>6</sub>]DMSO):  $\delta$  = 14.25 (s, 1H), 7.39 (s, 10H), 5.92 (s, 4H) ppm.  $^{13}\text{C}$  NMR (100 MHz, [D<sub>6</sub>]DMSO):  $\delta$  = 133.7, 128.8, 128.6, 128.3, 56.4 ppm. HRMS: calc. for  $\text{C}_{24}\text{H}_{21}\text{N}_{17}$  [M+H]<sup>+</sup>: 362.1585; found: 362.1589.

**1,3-bis(2-hydroxyethyltetrazol-5-yl)triazene (1i)**. Yield 1.863 g (69%) of product **1i**.

$\text{NaNO}_2$  (0.690 g, 10 mmol) in 4 mL water was added dropwise to a solution of 2-hydroxyethyl-5-amino-tetrazole (2.582 g, 20 mmol) and concentrated HCl (2 mL, 24 mmol) in 10 mL water at 0 °C. After 2 h, the reaction stirred additional 2 h at room temperature. The precipitate was filtered, washed with filtrate, and dried to provide high purity product.

White solid (**1i**): m.p. 132-133 °C. IR (KBr):  $\tilde{\nu}$  = 3412, 3309, 2931, 2816, 1603, 1472, 1316, 1220, 1068, 966, 862, 790, 744  $\text{cm}^{-1}$ .  $^1\text{H}$  NMR (400 MHz, [D<sub>6</sub>]DMSO):  $\delta$  = 14.19 (s, 1H), 5.09 (s, 2H), 4.70 (t,  $J$ =5.0 Hz, 4H), 3.93 (d,  $J$ =2.8 Hz, 4H) ppm.  $^{13}\text{C}$  NMR (100 MHz, [D<sub>6</sub>]DMSO):  $\delta$  = 165.6, 59.0, 56.2 ppm. HRMS: calc. for  $\text{C}_9\text{H}_{15}\text{N}_{17}\text{O}_3$  [M+H]<sup>+</sup>: 270.1170; found: 270.1172.

### General procedure to synthesize substituted tetrazolyl pentazadiene **2a-2f**, **2h**, **2i**

1,3-Bis(2-substituted-tetrazol-5-yl)triazene (**1a-1f**, **1h**, **1i**, 0.5 mmol) and 1-(3-dimethylaminoprop-yl)-3-ethyl-carbodiimide hydrochloride (EDCI, 58 mg, 0.3 mmol) were dissolved in 5 mL  $\text{CH}_2\text{Cl}_2$  at room temperature. After stirring for 24 h, the reaction mixture was concentrated under reduced pressure and the residue purified by column chromatography to provide 1,3,5-tri(2-substituted-tetrazol-5-yl)pentazadiene (**2a-2f**, **2h**, **2i**). After recrystallization from PE/ $\text{CH}_2\text{Cl}_2$ , high purity product was obtained.

**1,3,5-tri(2-methyltetrazol-5-yl)pentazadiene (2a)**. Yield 64 mg (80%) of product **2a**.

White solid (**2a**): DSC (5 °C min<sup>-1</sup>): 141 °C (dec.). IR (KBr):  $\tilde{\nu}$  = 1495, 1466, 1397, 1202, 1154, 1077, 942, 761, 720, 576  $\text{cm}^{-1}$ .  $^1\text{H}$  NMR (400 MHz,  $\text{CDCl}_3$ ):  $\delta$  = 4.50 (s, 3H), 4.41 (s, 6H) ppm.  $^{13}\text{C}$  NMR (100 MHz,  $\text{CDCl}_3$ ):  $\delta$  = 167.7, 153.8, 40.8, 40.2 ppm.  $^{15}\text{N}$  NMR (70 MHz,  $\text{CD}_2\text{Cl}_2$ ):  $\delta$  = 85.3 (N6), 10.7 (N5), 9.5 (N3), 4.8 (N10), -44.0 (N4), -56.5 (N11), -69.3 (N1), -82.6 (N8), -97.1 (N2), -101.4 (N9), -138.4 (N7) ppm. Elemental analysis: ( $\text{C}_6\text{H}_9\text{N}_{17}$ , 319.12) calc.: C 22.57, H 2.84, N 74.59; found: C 22.83, H 2.87, N 74.30. HRMS: calc. for  $\text{C}_6\text{H}_9\text{N}_{17}$  [M+H]<sup>+</sup>: 320.1300; found: 320.1295.

### Another procedure to synthesize **2a**.

When the reaction completed, 20 mL  $\text{CH}_2\text{Cl}_2$  and 10 mL concentrated HCl were added to the reaction mixture. After rapid extraction, the organic layer was washed with saturated  $\text{NaHCO}_3$  (30 mL  $\times$  2) and brine (30 mL), dry over  $\text{Na}_2\text{SO}_4$ , evaporated under reduced pressure. The crude product was purified by recrystallization from PE/ $\text{CH}_2\text{Cl}_2$  (60 mg, 75%).



**1,3,5-tri(2-benzyltetrazol-5-yl)pentazadiene (2b).** Yield 94 mg (70%) of product **2b**.

White solid (**2b**): DSC (5 °C min<sup>-1</sup>): 132 °C (dec.), 236 °C (dec.). IR (KBr):  $\tilde{\nu}$  = 3065, 3032, 3017, 1487, 1472, 1334, 1246, 1204, 1159, 1117, 1071, 1037, 955, 723, 595 cm<sup>-1</sup>. <sup>1</sup>H NMR (400 MHz, CDCl<sub>3</sub>):  $\delta$  = 7.38 (s, 15H), 5.85 (s, 2H), 5.78 (s, 4H) ppm. <sup>13</sup>C NMR (100 MHz, CDCl<sub>3</sub>):  $\delta$  = 167.7, 153.8, 132.3, 131.9, 129.3, 129.2, 129.1, 128.6, 128.5, 58.1, 57.7 ppm. Elemental analysis: (C<sub>24</sub>H<sub>21</sub>N<sub>17</sub>, 547.22) calc.: C 52.65, H 3.87, N 43.49; found: C 53.19, H 3.87, N 42.95. HRMS: calc. for C<sub>24</sub>H<sub>21</sub>N<sub>17</sub> [M+H]<sup>+</sup>: 548.2239; found: 548.2239.

**1,3,5-tri(2-allyltetrazol-5-yl)pentazadiene (2c).** Yield 72 mg (72%) of product **2c**.

White solid (**2c**): DSC (5 °C min<sup>-1</sup>): 99 °C (m.p.); 100 °C (dec.). IR (KBr):  $\tilde{\nu}$  = 3098, 2988, 1487, 1472, 1460, 1424, 1173, 1156, 1074, 1036, 957, 788, 720, 576 cm<sup>-1</sup>. <sup>1</sup>H NMR (400 MHz, CDCl<sub>3</sub>):  $\delta$  = 6.03-6.20 (m, 3H), 5.40-5.49 (m, 6H), 5.33 (dt, <sup>3</sup>J=6.4 Hz, 2H), 5.25 (dt, <sup>3</sup>J=6.4 Hz, 4H) ppm. <sup>13</sup>C NMR (100 MHz, CDCl<sub>3</sub>):  $\delta$  = 167.7, 153.8, 128.9, 128.6, 122.1, 121.8, 56.7, 56.2 ppm. Elemental analysis: (C<sub>12</sub>H<sub>15</sub>N<sub>17</sub>, 397.17) calc.: C 36.27, H 3.80, N 59.92; found: C 37.11, H 3.41, N 59.47. HRMS: calc. for C<sub>12</sub>H<sub>15</sub>N<sub>17</sub> [M+H]<sup>+</sup>: 398.1769; found: 398.1772.

**1,3,5-tri(2-tert-butyltetrazol-5-yl)pentazadiene (2d).** Yield 83 mg (75%) of product **2d**.

White solid (**2d**): DSC (5 °C min<sup>-1</sup>): 135 °C (dec.). IR (KBr):  $\tilde{\nu}$  = 2989, 2940, 1486, 1455, 1373, 1313, 1240, 1190, 1172, 1144, 1067, 945, 758, 638 cm<sup>-1</sup>. <sup>1</sup>H NMR (400 MHz, CDCl<sub>3</sub>):  $\delta$  = 1.80 (s, 9H), 1.75 (s, 18H) ppm. <sup>13</sup>C NMR (100 MHz, CDCl<sub>3</sub>):  $\delta$  = 167.3, 153.2, 66.0, 65.2, 29.2 ppm. Elemental analysis: (C<sub>15</sub>H<sub>27</sub>N<sub>17</sub>, 445.26) calc.: C 40.44, H 6.11, N 53.45; found: C 41.43, H 6.04, N 52.53. HRMS: calc. for C<sub>15</sub>H<sub>27</sub>N<sub>17</sub> [M+H]<sup>+</sup>: 446.2708; found: 446.2713.

**1,3,5-tri(2-bromoethyltetrazol-5-yl)pentazadiene (2e).** Yield 109 mg (73%) of product **2e**.

White solid (**2e**): DSC (5 °C min<sup>-1</sup>): 123 °C (m.p.); 124 °C (dec.). IR (KBr):  $\tilde{\nu}$  = 3013, 2968, 1492, 1459, 1430, 1401, 1364, 1309, 1257, 1165, 1077, 942, 881, 760, 587, 570 cm<sup>-1</sup>. <sup>1</sup>H NMR (400 MHz, CDCl<sub>3</sub>):  $\delta$  = 5.16 (t, *J*=6.8 Hz, 2H), 5.07 (t, *J*=6.4 Hz, 4H), 3.94 (t, *J*=6.8 Hz, 2H), 3.90 (t, *J*=6.4 Hz, 4H) ppm. <sup>13</sup>C NMR (100 MHz, CDCl<sub>3</sub>):  $\delta$  = 167.7, 153.9, 55.2, 54.8, 26.7, 26.1 ppm. HRMS: calc. for C<sub>9</sub>H<sub>12</sub>Br<sub>3</sub>N<sub>17</sub> [M+H]<sup>+</sup>: 597.9069; found: 597.9055.

**1,3,5-tri(2-methoxycarbonylmethyltetrazol-5-yl)pentazadiene (2f).** Yield 92 mg (75%) of product **2f**.

White solid (**2f**): DSC (5 °C min<sup>-1</sup>): 120 °C (m.p.); 121 °C (dec.), 221 °C (dec.). IR (KBr):  $\tilde{\nu}$  = 3015, 2962, 1758, 1497, 1471, 1440, 1358, 1227, 1163, 1076, 992, 942, 804, 756, 595, 580 cm<sup>-1</sup>. <sup>1</sup>H NMR (400 MHz, CDCl<sub>3</sub>):  $\delta$  = 5.57 (s, 2H), 5.47 (s, 4H), 3.85 (s, 3H), 3.81 (s, 6H) ppm. <sup>13</sup>C NMR (100 MHz, CDCl<sub>3</sub>):  $\delta$  = 167.8, 164.8, 164.4, 154.0, 54.3, 53.8, 53.6, 53.5 ppm. Elemental analysis: (C<sub>12</sub>H<sub>15</sub>N<sub>17</sub>O<sub>6</sub>, 493.14) calc.: C 29.21, H 3.06, N 48.26; found: C 29.80, H 2.56, N 48.18. HRMS: calc. for C<sub>12</sub>H<sub>15</sub>N<sub>17</sub>O<sub>6</sub> [M+H]<sup>+</sup>: 494.1464; found: 494.1465.

**1,3,5-tri(2-vinyltetrazol-5-yl)pentazadiene (2h).** Yield 72 mg (81%) of product **2h**.

White solid (**2h**): DSC (5 °C min<sup>-1</sup>): 122 °C (dec.). IR (KBr):  $\tilde{\nu}$  = 3129, 3104, 1644, 1493, 1468, 1410, 1385, 1175, 1153, 1074, 1032, 1007, 944, 914, 744 cm<sup>-1</sup>. <sup>1</sup>H NMR (400 MHz, CDCl<sub>3</sub>):  $\delta$  = 7.58 (dd, *J*=15.8, 8.6 Hz, 1H), 7.54 (dd, *J*=15.6, 8.4 Hz, 2H), 6.33 (dd, *J*=15.6, 1.6 Hz, 1H), 6.32 (dd, *J*=15.8, 1.8 Hz, 2H), 5.58 (dd, *J*=8.8, 1.6 Hz, 1H), 5.50 (dd, *J*=8.4, 1.6 Hz, 2H) ppm. <sup>13</sup>C NMR (100 MHz, CDCl<sub>3</sub>):  $\delta$  = 167.1, 153.6, 129.8, 129.7, 111.2, 110.4 ppm. HRMS: calc. for C<sub>9</sub>H<sub>9</sub>N<sub>17</sub> [M+H]<sup>+</sup>: 356.1300; found: 356.1305.

**1,3,5-tri(2-hydroxyethyltetrazol-5-yl)pentazadiene (2i).** Yield 38 mg (37%) of product **2i**.

White solid (**2i**): DSC (5 °C min<sup>-1</sup>): 118 °C (m.p.); 119 °C (dec.). IR (KBr):  $\tilde{\nu}$  = 3390, 2939, 1591, 1492, 1401, 1212, 1165, 1077, 944, 870, 760 cm<sup>-1</sup>. <sup>1</sup>H NMR (400 MHz, CD<sub>3</sub>CN):  $\delta$  = 4.88 (t, *J*=5.2 Hz, 2H), 4.75 (t, *J*=5.0 Hz, 4H), 4.10 (dd, *J*=10.4, 5.2 Hz, 2H), 4.05 (dd, *J*=10.6, 5.8 Hz, 4H), 3.28 (t, *J*=5.8 Hz, 1H), 3.13 (t, *J*=6.0 Hz, 2H) ppm. <sup>13</sup>C NMR (100 MHz, CD<sub>3</sub>CN):  $\delta$  = 168.5, 154.6, 60.4, 60.2, 58.4, 57.6 ppm. Elemental analysis: (C<sub>9</sub>H<sub>15</sub>N<sub>17</sub>O<sub>3</sub>, 409.15) calc.: C 26.41, H 3.69, N 58.17; found: C 27.02, H 3.66, N 57.59. HRMS: calc. for C<sub>9</sub>H<sub>15</sub>N<sub>17</sub>O<sub>3</sub> [M+H]<sup>+</sup>: 410.1617; found: 410.1615.

**1,3,5-tri(2-cyanomethyltetrazol-5-yl)pentazadiene (2g).** Yield 79 mg (80%) of product **2g**.

1,3-Bis(2-cyanomethyltetrazol-5-yl)triazene (130 mg, 0.5 mmol) and 1-(3-dimethylaminoprop-yl)-3-ethyl-carbodiimide hydrochloride (EDCI, 58 mg, 0.3 mmol) were dissolved in 4 mL CH<sub>2</sub>Cl<sub>2</sub> and 1 mL acetonitrile at room temperature. After stirring for 24 h, the solvent was evaporated in vacuum and the residue purified by column chromatography to provide **2g**. After recrystallization from PE/EtOAc, high purity product was obtained.

White solid (**2g**): DSC (5 °C min<sup>-1</sup>): 128 °C (dec.). IR (KBr):  $\tilde{\nu}$  = 3000, 2956, 1497, 1470, 1404, 1368, 1166, 1039, 1075, 941, 793, 756, 595 cm<sup>-1</sup>. <sup>1</sup>H NMR (400 MHz, CD<sub>3</sub>CN):  $\delta$  = 5.94 (s, 2H), 5.83 (s, 4H) ppm. <sup>13</sup>C NMR (100 MHz, CD<sub>3</sub>CN):  $\delta$  = 168.5, 154.9, 112.9, 112.8, 43.5, 42.6 ppm. HRMS: calc. for C<sub>9</sub>H<sub>6</sub>N<sub>20</sub> [M+H]<sup>+</sup>: 395.1157; found: 395.1162.

**1,3,5-tri(1-methyltetrazol-5-yl)pentazadiene (2j).** Yield 51 mg (64%) of product **2j**.

1,3-Bis(1-methyltetrazol-5-yl)triazene (105 mg, 0.5 mmol) and 1-(3-dimethylaminoprop-yl)-3-ethyl-carbodiimide hydrochloride (EDCI, 58 mg, 0.3 mmol) were dissolved in 5 mL acetonitrile at room temperature. After stirring for 24 h, the solvent was evaporated in vacuum and the residue purified by column chromatography to provide **2j**. After recrystallization from PE/EtOAc, high purity product was obtained.

White solid (**2j**): DSC (5 °C min<sup>-1</sup>): 141 °C (dec.). IR (KBr):  $\tilde{\nu}$  = 1518, 1467, 1140, 1089, 1039, 948, 744, 583 cm<sup>-1</sup>. <sup>1</sup>H NMR (400 MHz, [D<sub>6</sub>]DMSO):  $\delta$  = 4.15 (s, 3H), 4.02 (s, 6H) ppm. <sup>13</sup>C NMR (100 MHz, [D<sub>6</sub>]DMSO):  $\delta$  = 155.6, 144.6, 34.4, 34.4 ppm. <sup>15</sup>N NMR (70 MHz, [D<sub>7</sub>]DMF):  $\delta$  = 82.6 (N6), 16.6 (N3), 10.6 (N10), 2.8 (N5), -0.6 (N2), -5.7 (N9), -47.6 (N4), -64.9 (N11), -145.1 (N7), -150.5 (N1), -156.7 (N8) ppm. Elemental analysis: (C<sub>6</sub>H<sub>9</sub>N<sub>17</sub>, 319.12) calc.: C 22.57, H 2.84, N 74.59; found: C 23.41, H 2.80, N 73.79. The chemical stability of **2j** is very poor, so it will decomposed to **1j** in ESI-MS.

## Reaction of tetrazolyl triazene with *N*-methyl-*p*-toluidine

1,3-Bis(2-methyltetrazol-5-yl)triazene (**1a**, 209 mg, 1.0 mmol), 1-(3-dimethylaminoprop-yl)-3-ethyl-carbodiimide hydrochloride (EDCI, 230 mg, 1.2 mmol) and *N*-methyl-*p*-toluidine (150  $\mu$ L, 1.2 mmol) were dissolved in 10 mL  $\text{CH}_2\text{Cl}_2$  at room temperature. After stirring for 6 h, the reaction mixture was concentrated under reduced pressure and the residue purified by column chromatography to provide product **5** and **6**.

White solid (**5**): m.p. 99-100  $^\circ\text{C}$ . IR (KBr):  $\tilde{\nu}$  = 2959, 2926, 1726, 1600, 1514, 1458, 1378, 1286, 1119, 1072, 1039, 981, 822, 739  $\text{cm}^{-1}$ .  $^1\text{H}$  NMR (400 MHz, [D6]DMSO):  $\delta$  = 7.45 (d,  $J$ =6.4 Hz, 2H), 7.28 (d,  $J$ =6.8 Hz, 2H), 4.35 (s, 3H), 3.68 (s, 3H), 2.32 (s, 3H) ppm.  $^{13}\text{C}$  NMR (100 MHz, [D6]DMSO):  $\delta$  = 170.1, 141.4, 134.8, 129.7, 118.4, 39.8, 34.1, 20.3 ppm. HRMS: calc. for  $\text{C}_6\text{H}_9\text{N}_{17}$   $[\text{M}+\text{H}]^+$ : 232.1305; found: 232.1308.

Scarlet solid (**6**): m.p. 88-90  $^\circ\text{C}$ . IR (KBr):  $\tilde{\nu}$  = 2959, 2924, 1726, 1571, 1527, 1469, 1392, 1286, 1174, 1137, 1073, 1038, 743  $\text{cm}^{-1}$ .  $^1\text{H}$  NMR (400 MHz, [D6]DMSO):  $\delta$  = 8.53 (d,  $J$ =4.8 Hz, 1H), 7.57 (s, 1H), 7.30 (d,  $J$ =8.8 Hz, 1H), 6.86 (d,  $J$ =8.8 Hz, 1H), 4.43 (s, 3H), 2.97 (d,  $J$ =5.2 Hz, 3H), 2.26 (s, 3H) ppm.  $^{13}\text{C}$  NMR (100 MHz, [D6]DMSO):  $\delta$  = 171.6, 143.6, 137.1, 135.9, 128.5, 124.5, 112.6, 40.0, 29.1, 19.4 ppm. HRMS: calc. for  $\text{C}_6\text{H}_9\text{N}_{17}$   $[\text{M}+\text{H}]^+$ : 232.1305; found: 232.1309.

## References

- 1 *CrystalClear: SM Expert 2.0 r2, An Integrated Program for the Collection and Processing of Area Detector Data*, Rigaku Corporation, England, **2009**.
- 2 G. M. Sheldrick, *SHELXTL-97, Structure Determination Software Suite*, Bruker AXS, Madison, **2008**.
- 3 T. M. Klapötke, N. K. Minar, J. Stierstorfer, *Polyhedron* **2009**, 28, 13–26.

## X-ray crystallography of 2a

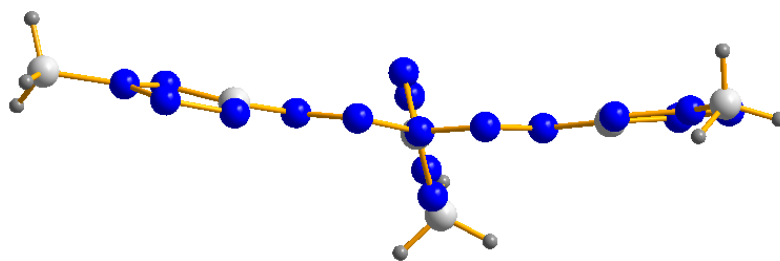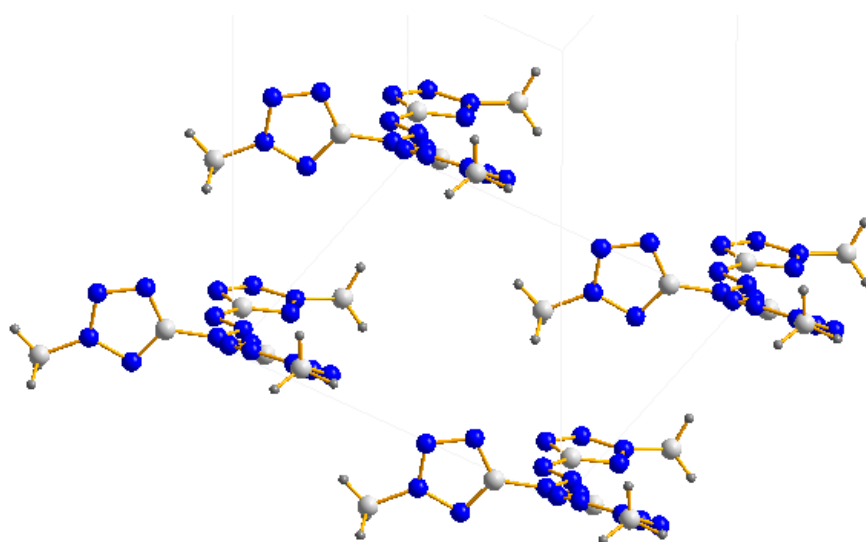

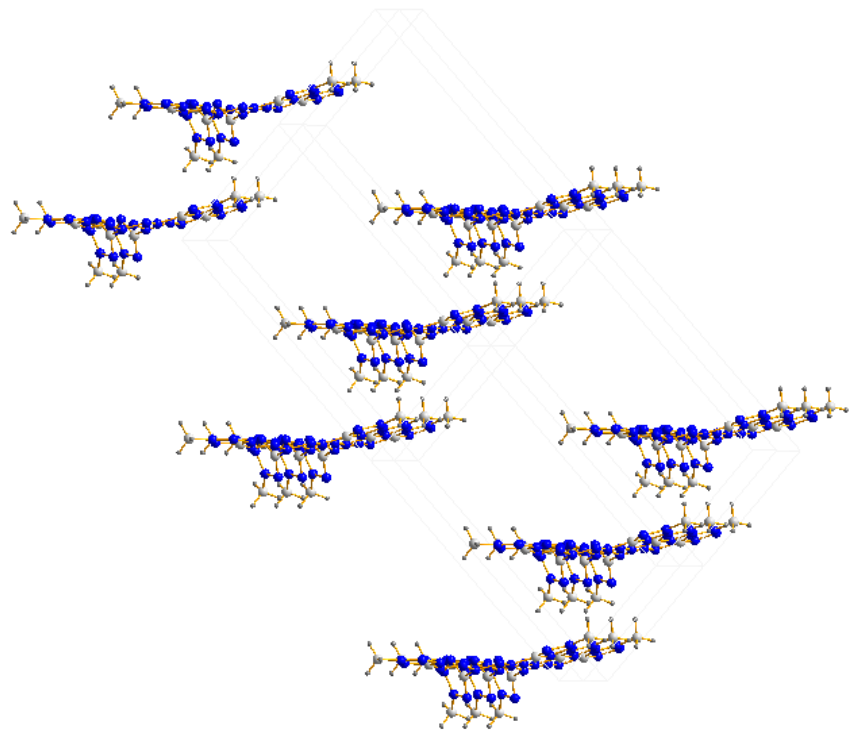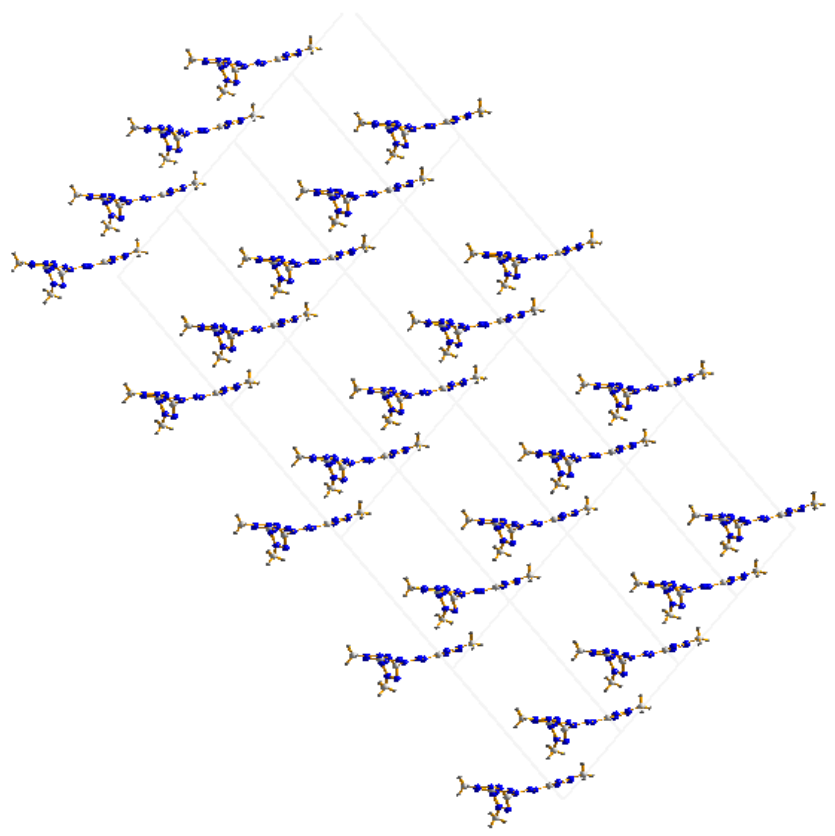

# Spectral data of 1b

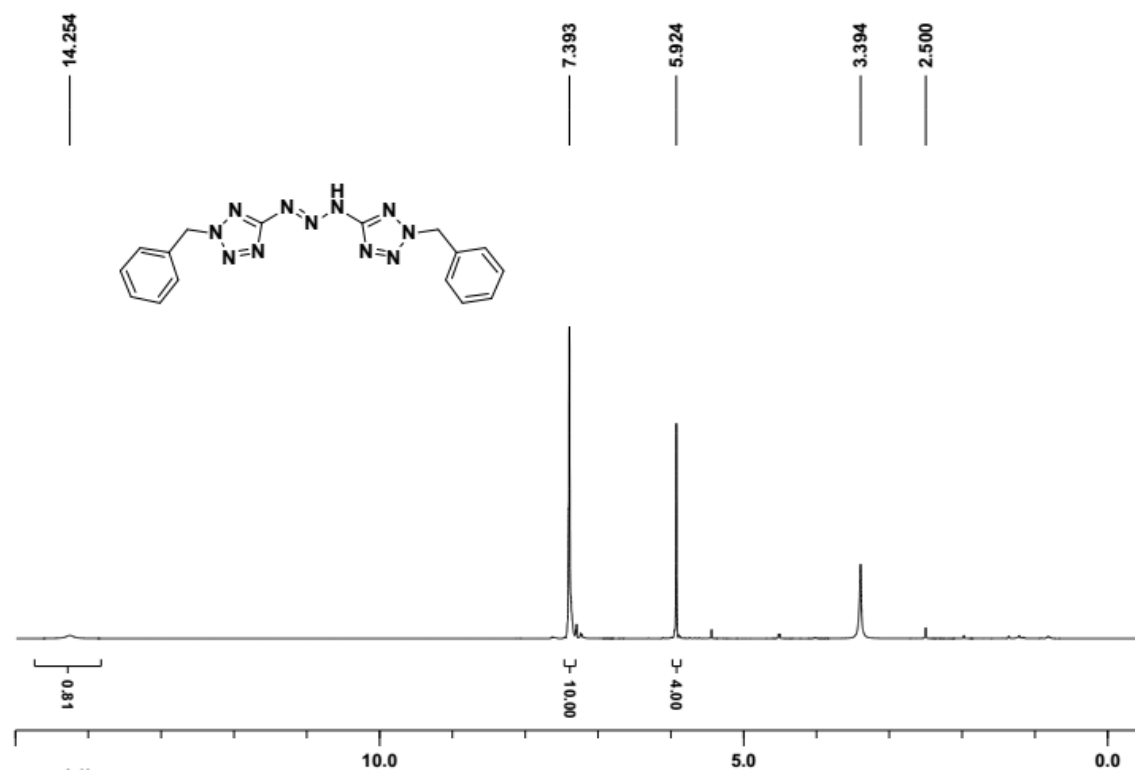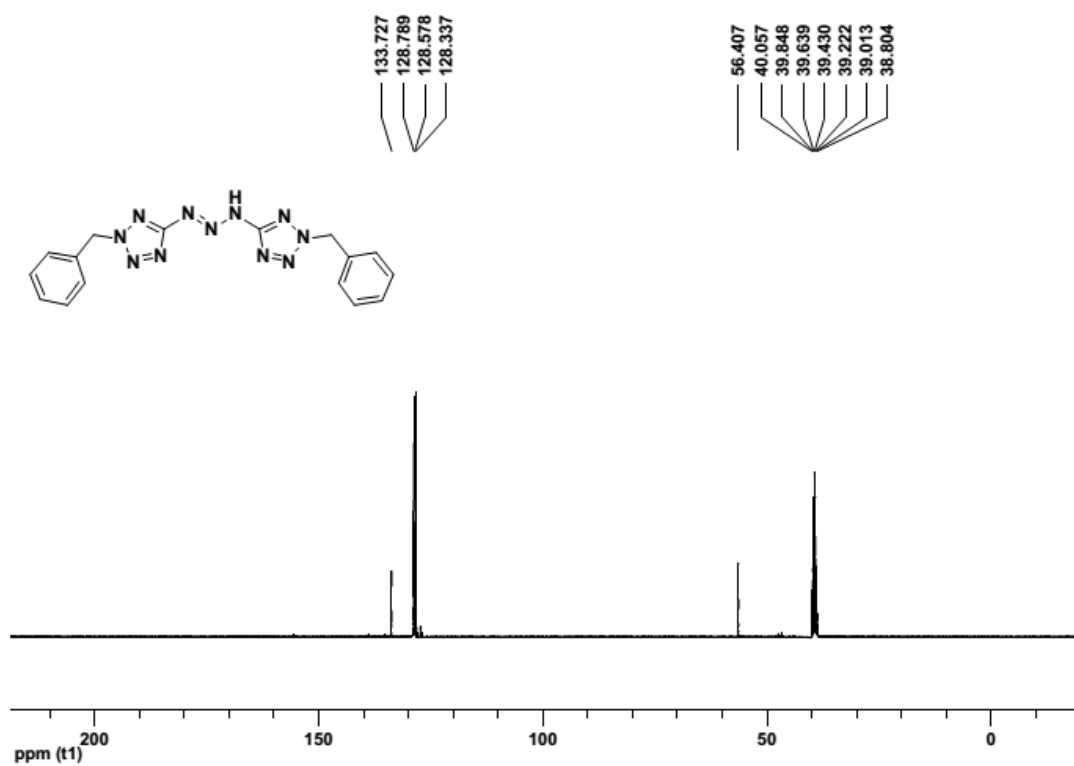

# Infrared

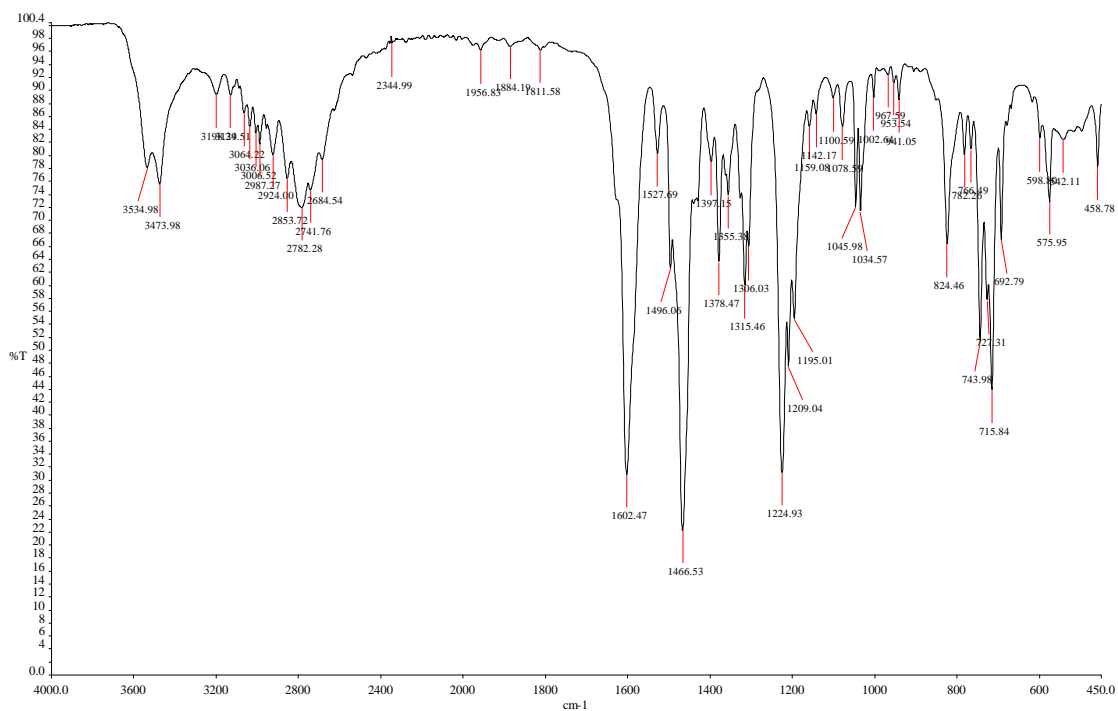

# HRMS

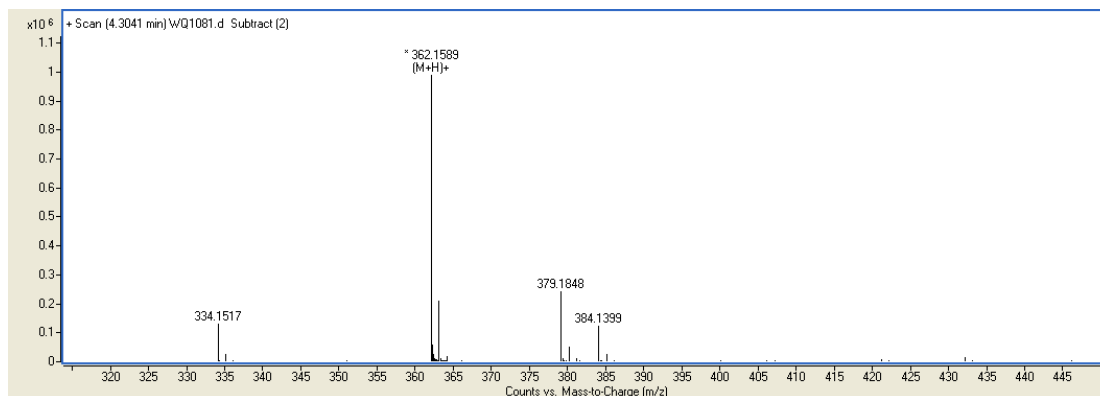

# Spectral data of 1c

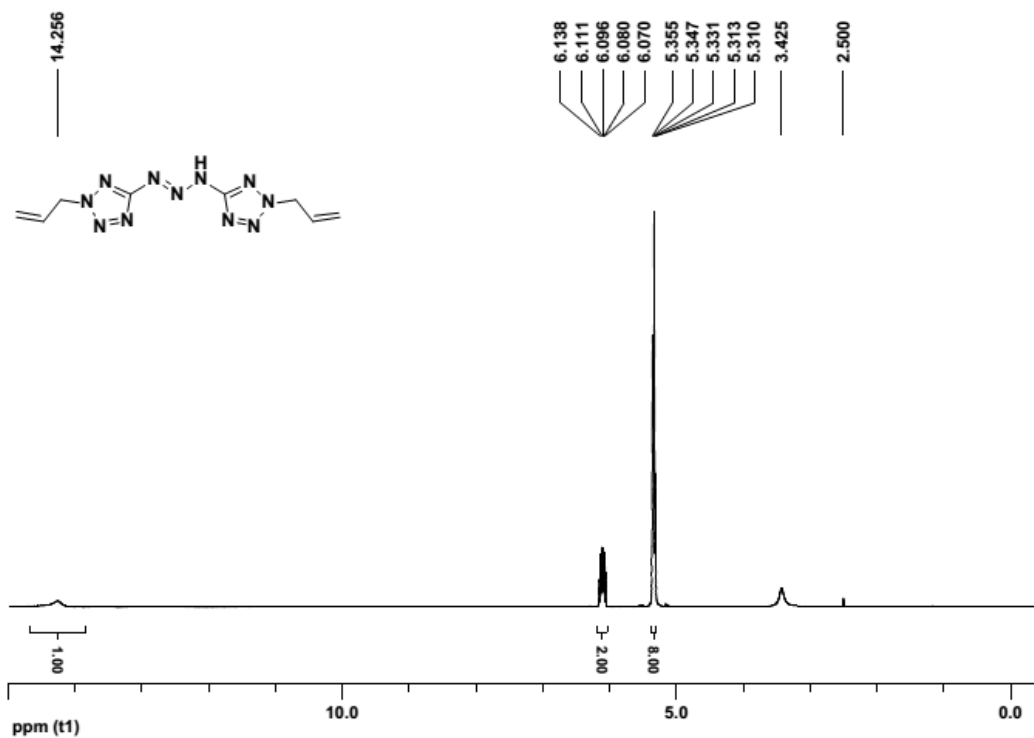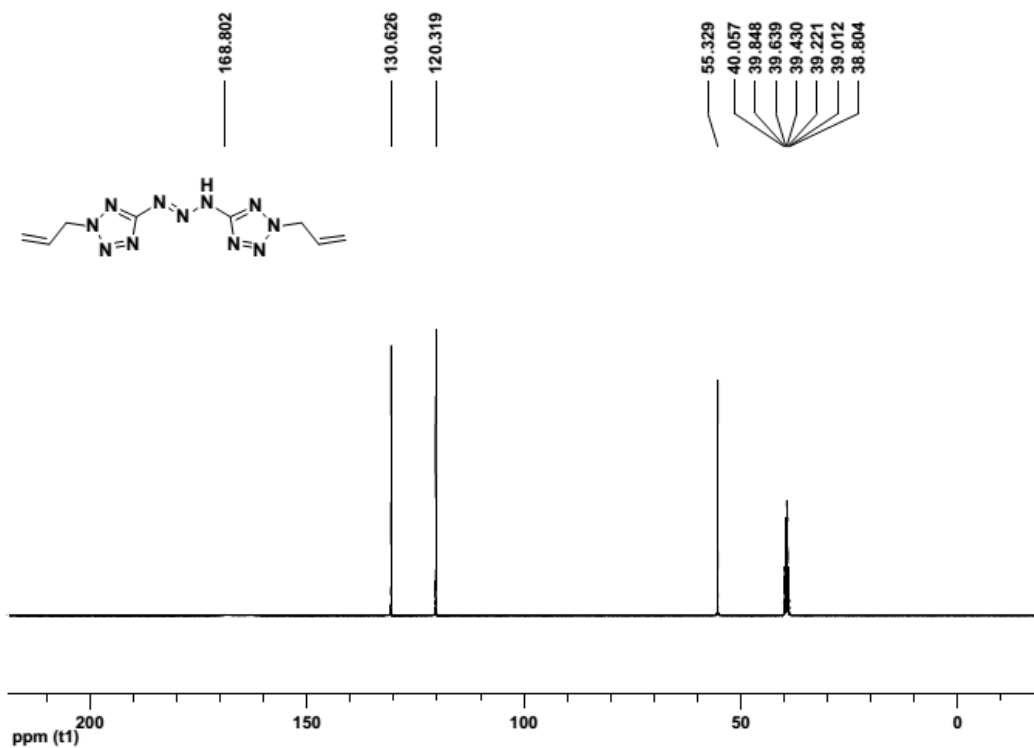



# Infrared

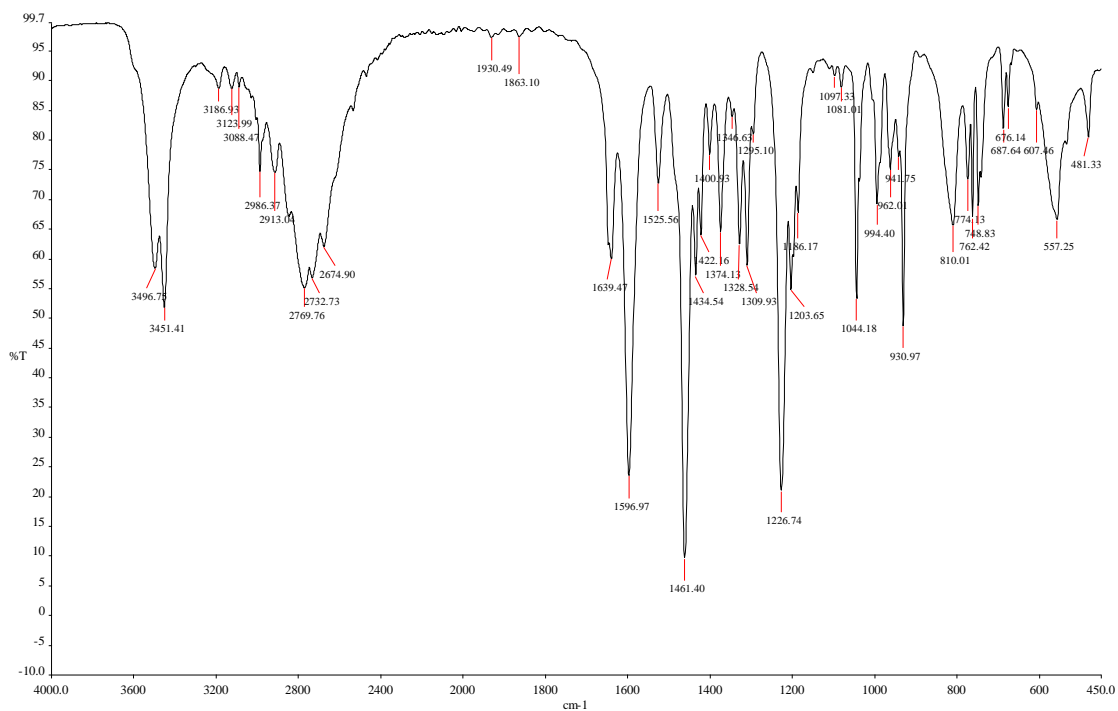

# HRMS

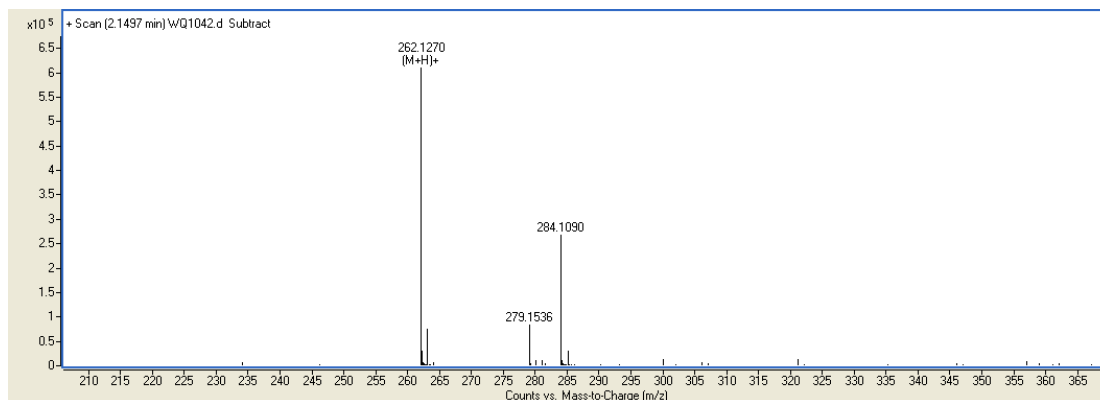

# Spectral data of 1d

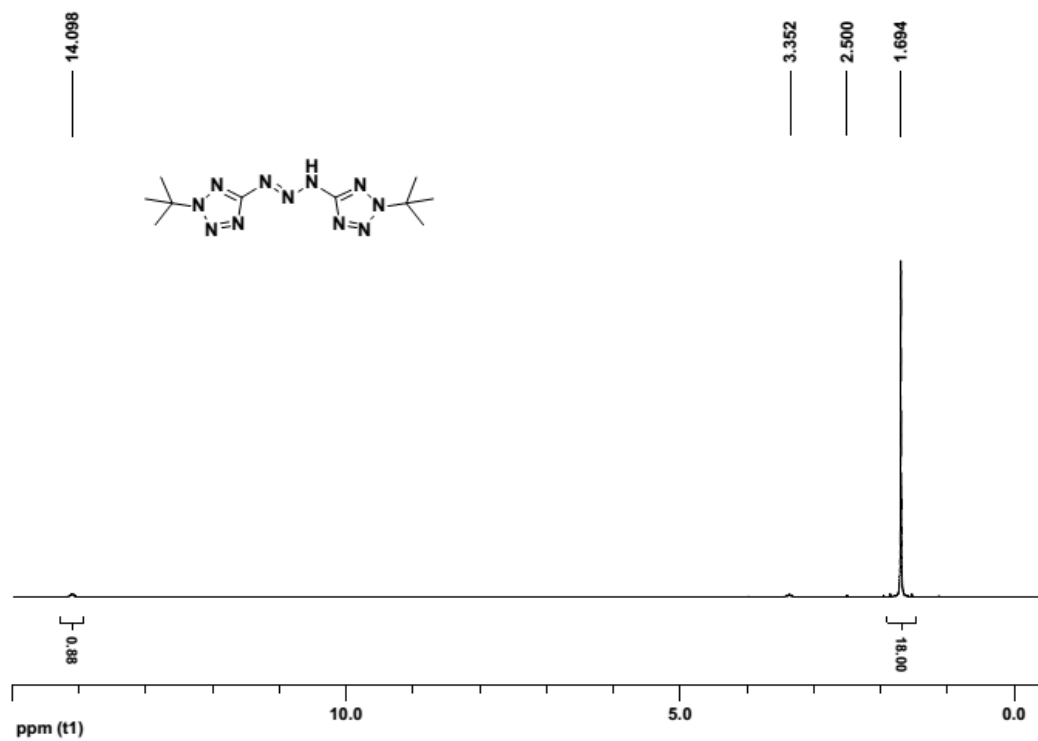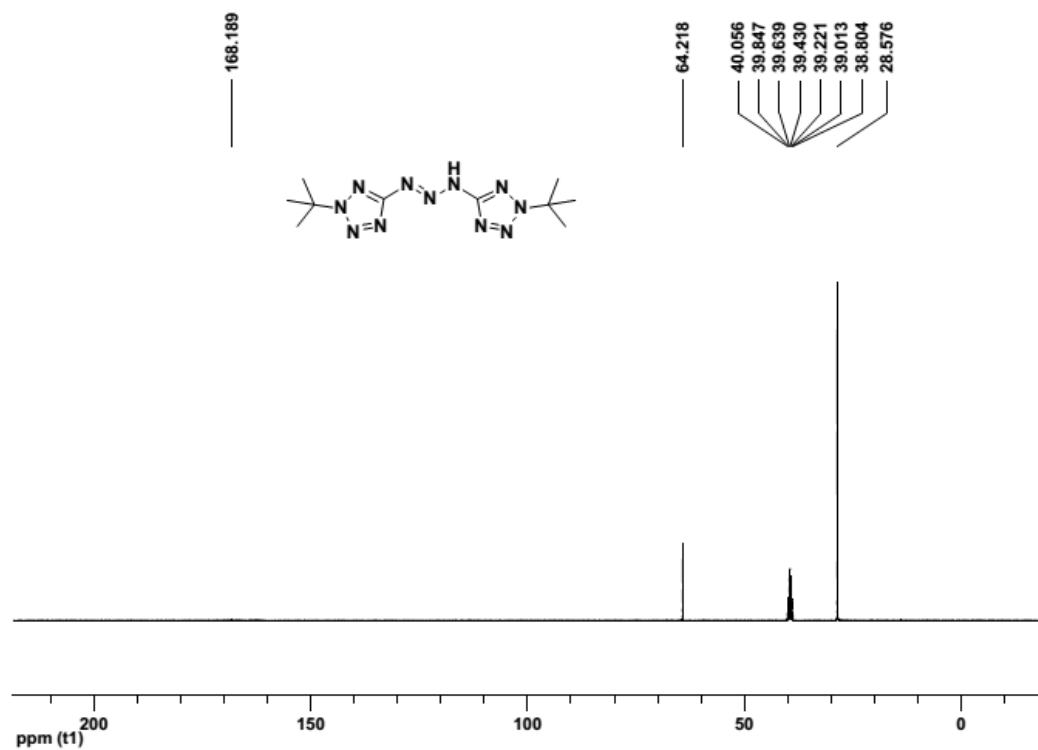

## Infrared

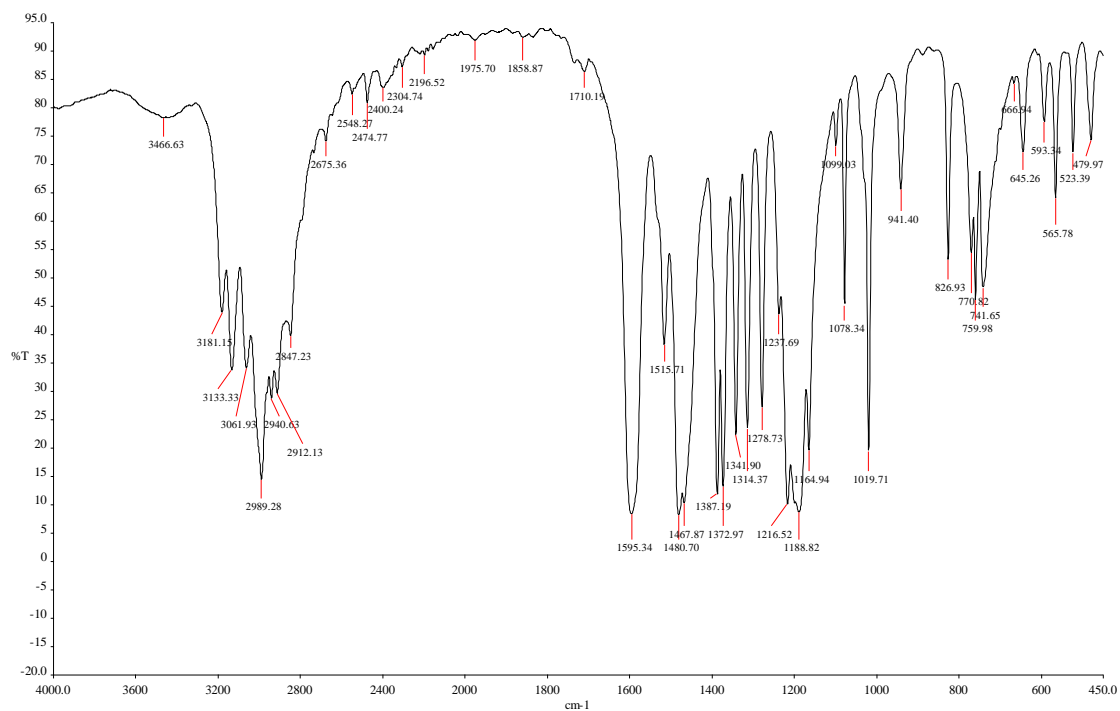

## HRMS

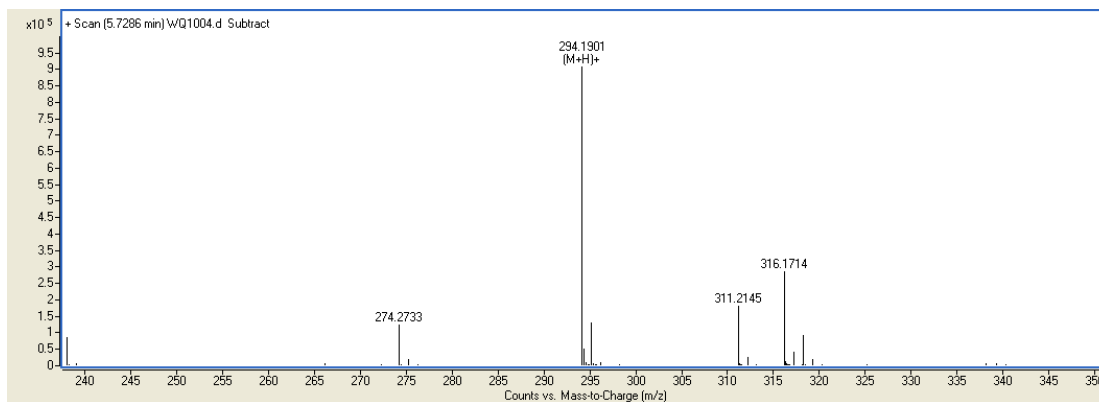

# Spectral data of 1e

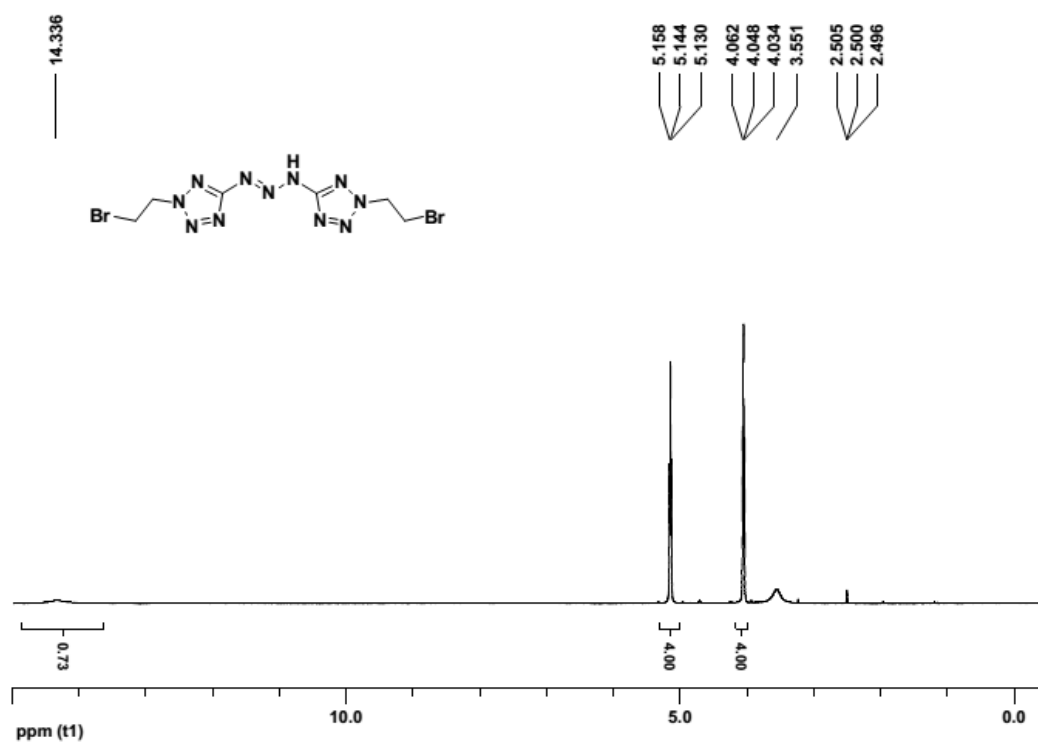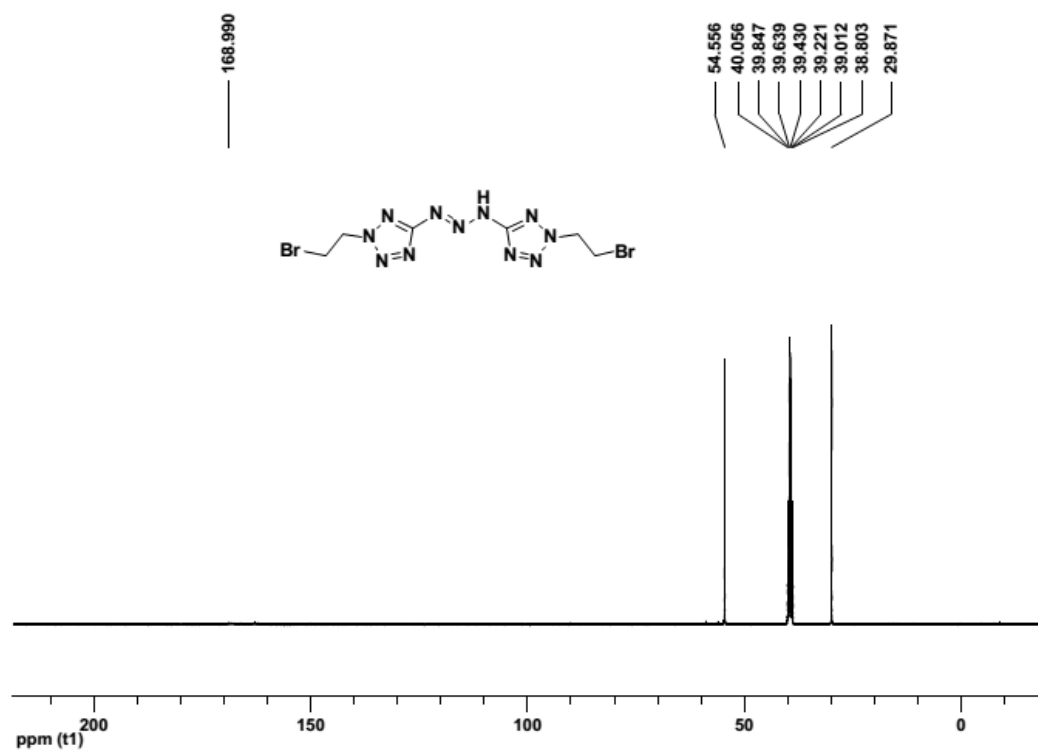

# Infrared

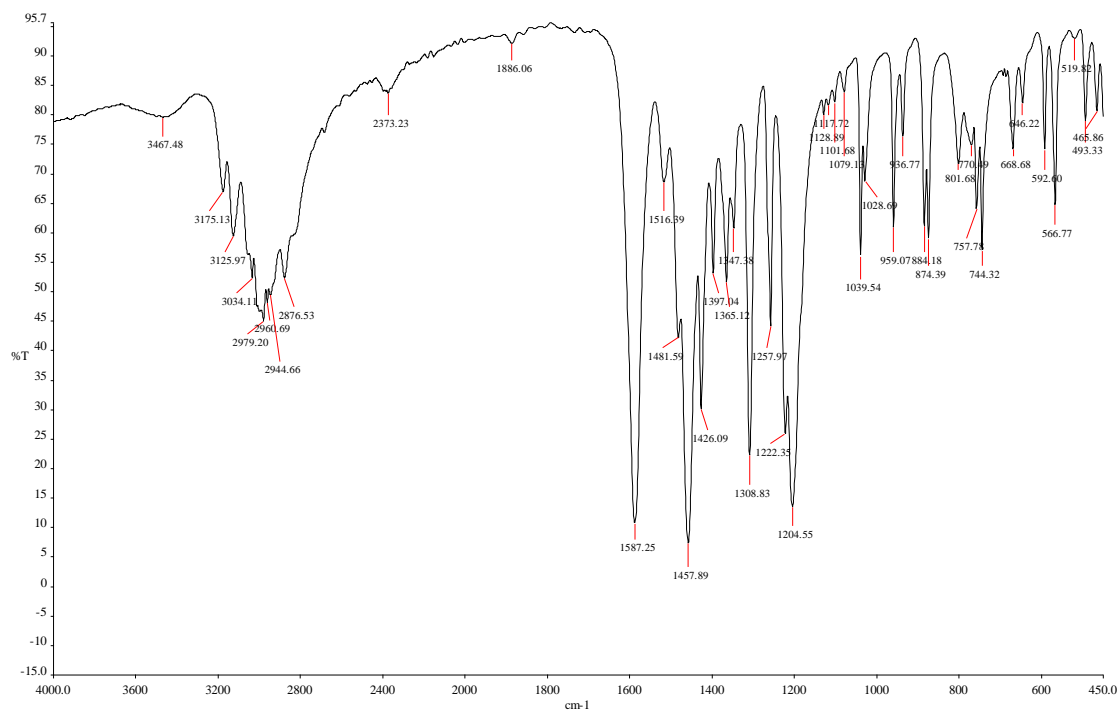

# HRMS

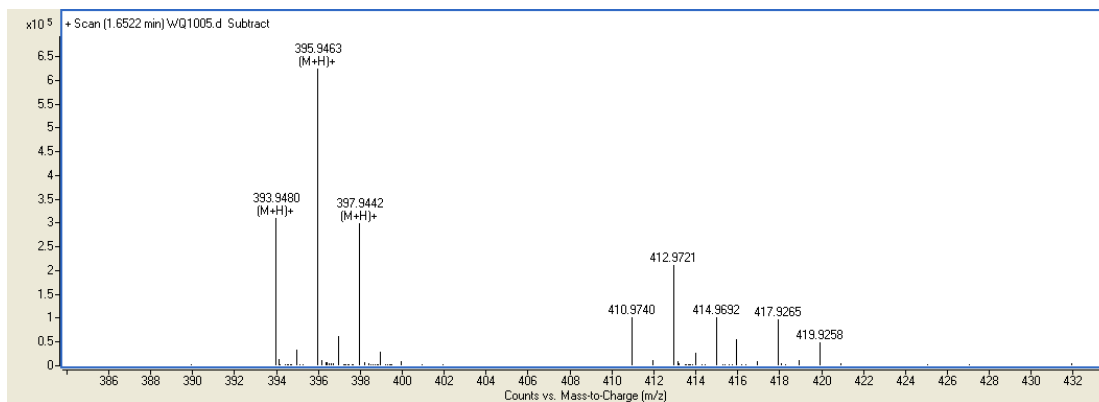

# Spectral data of 1f

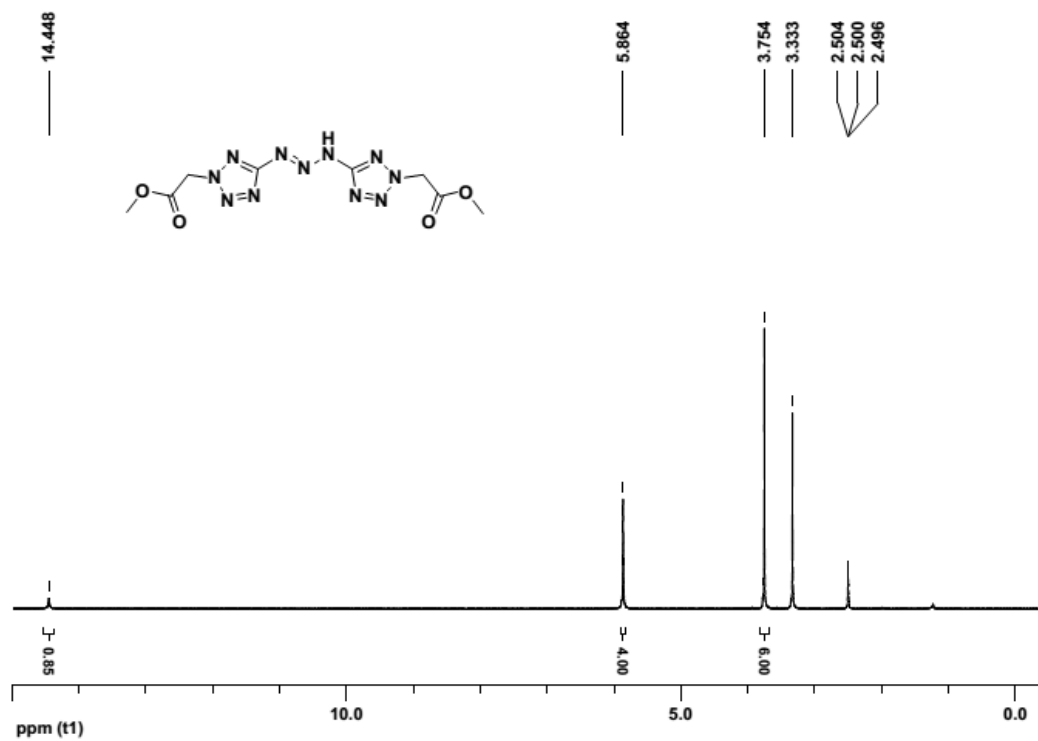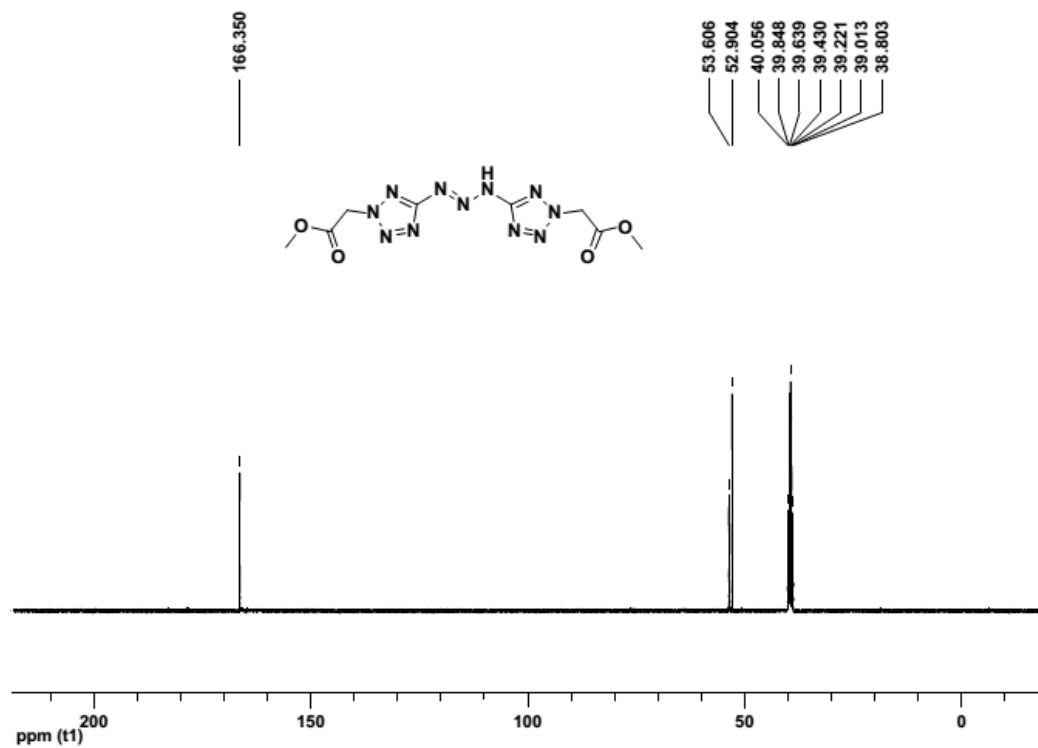

# Infrared

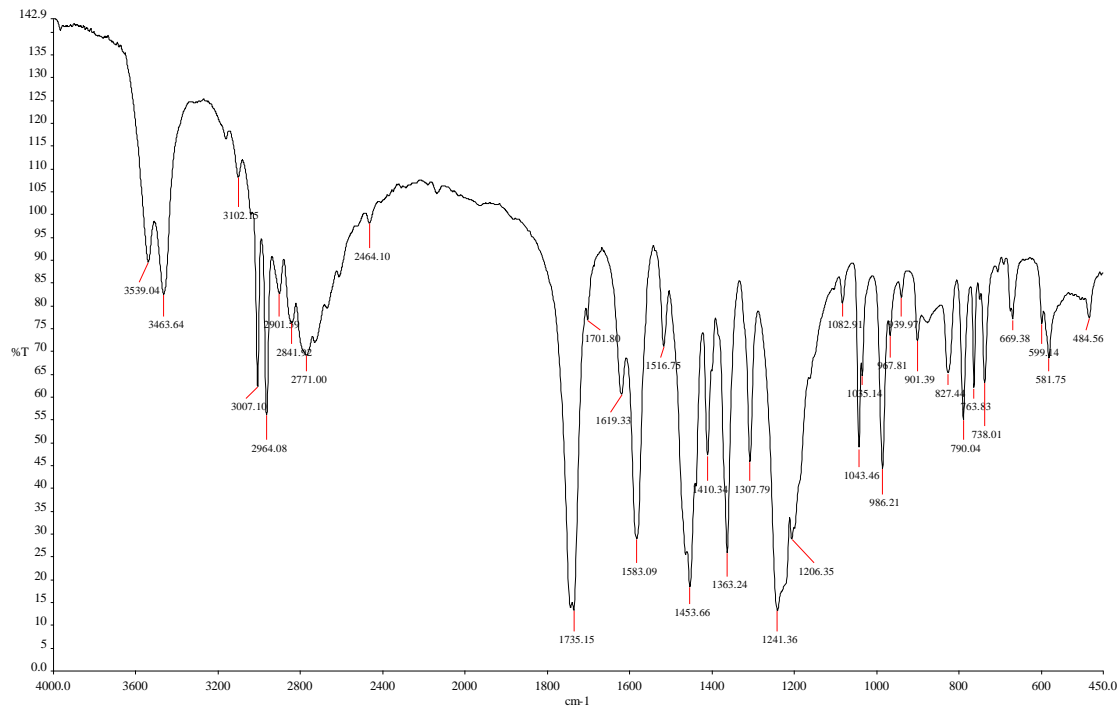

# HRMS

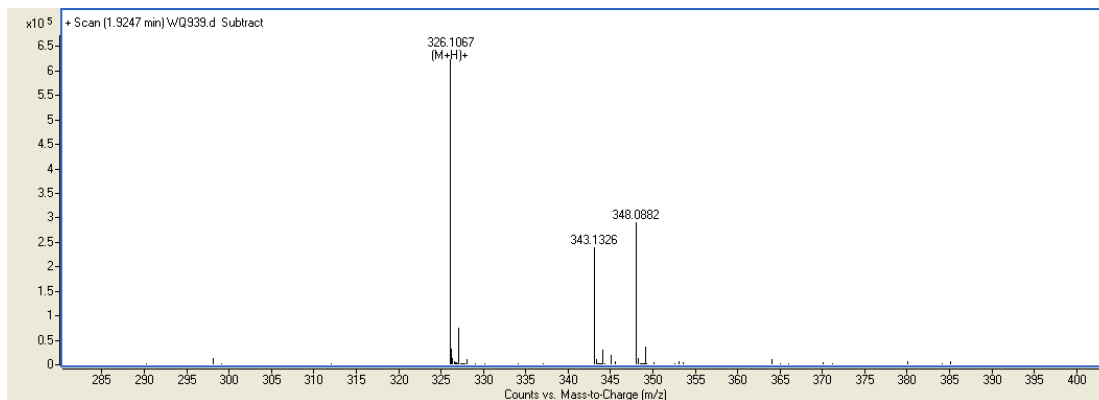

# Spectral data of 1g

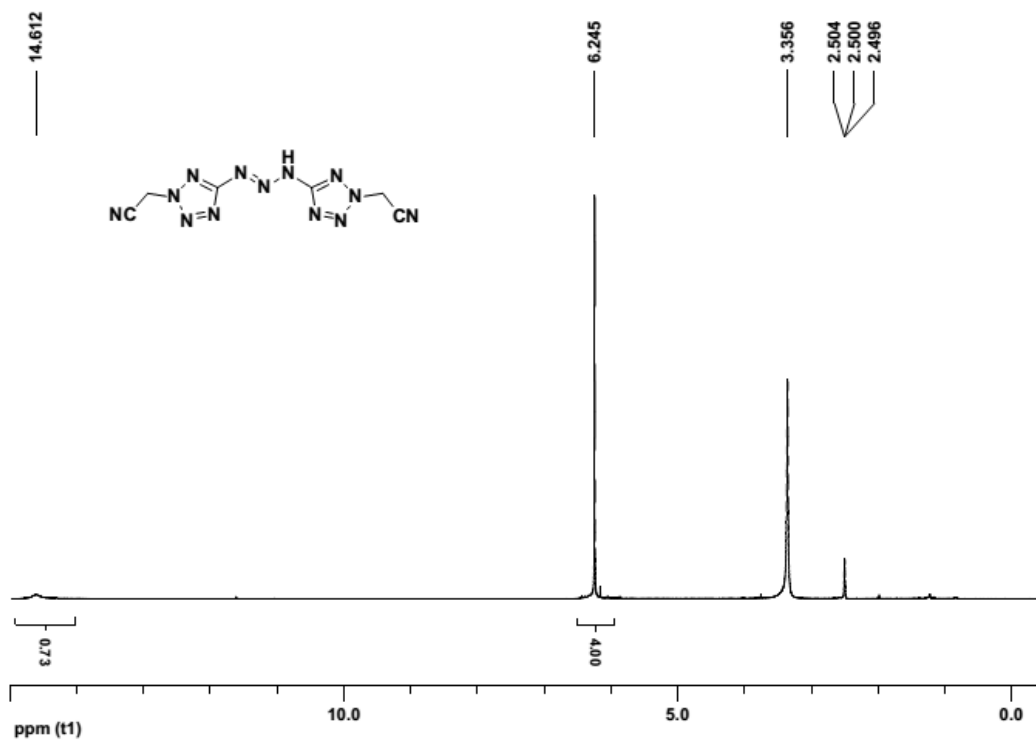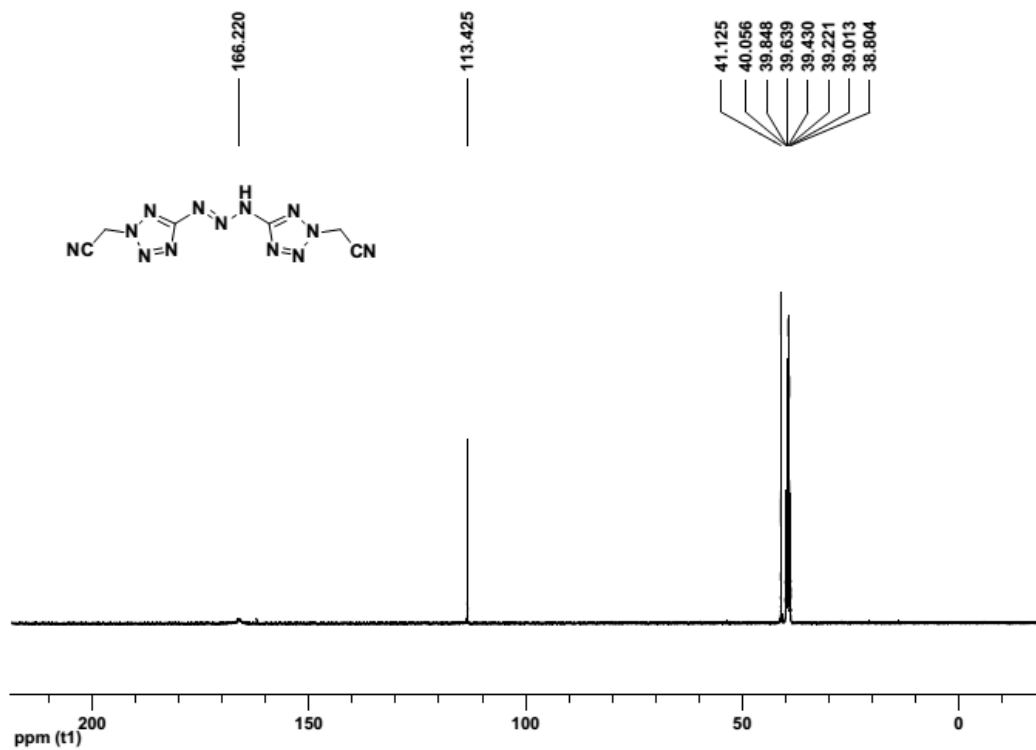



# Infrared

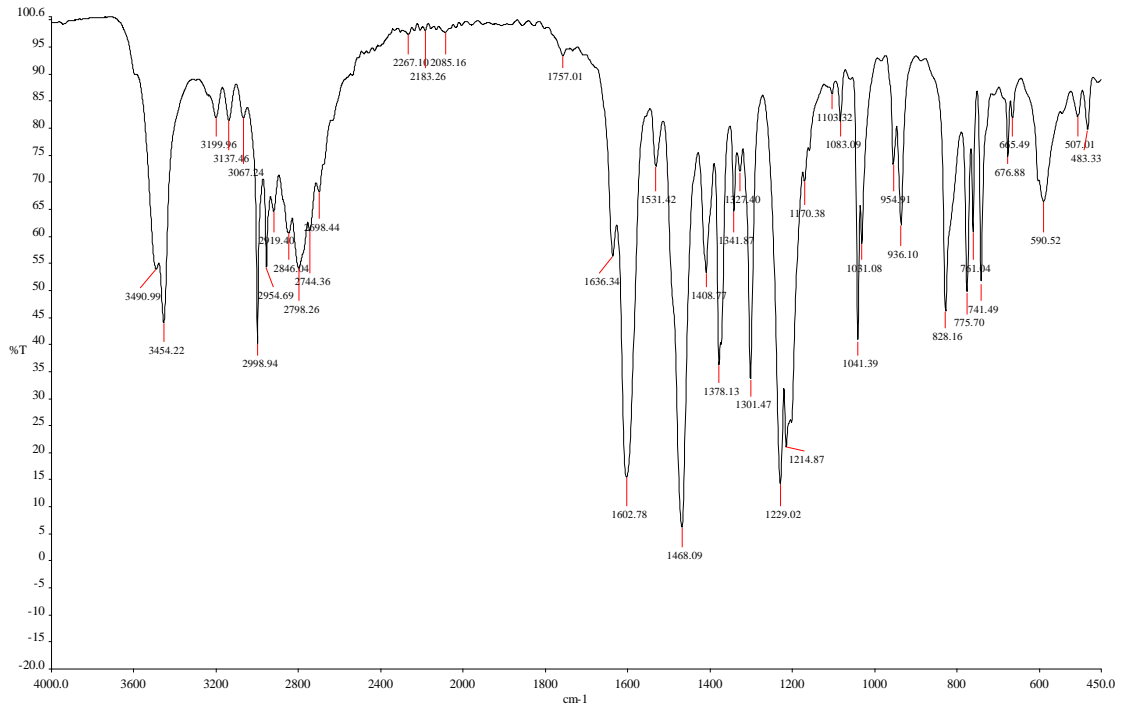

# HRMS

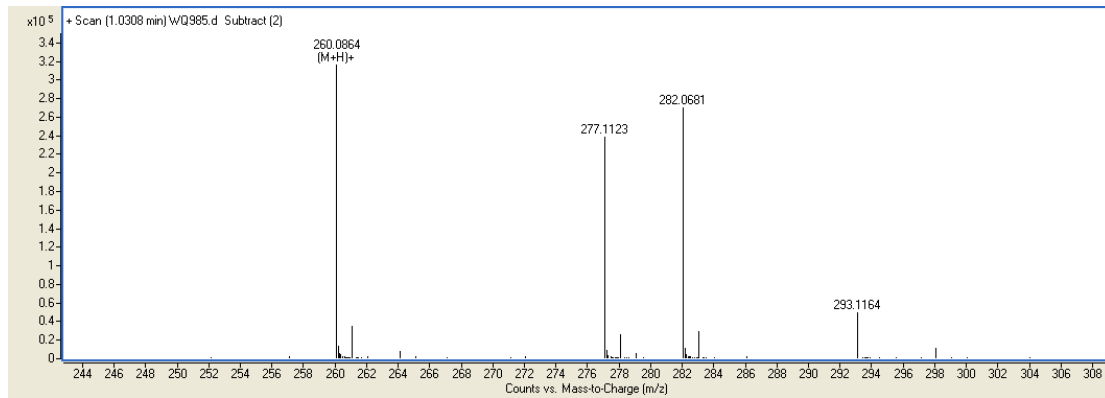

# Spectral data of 1h

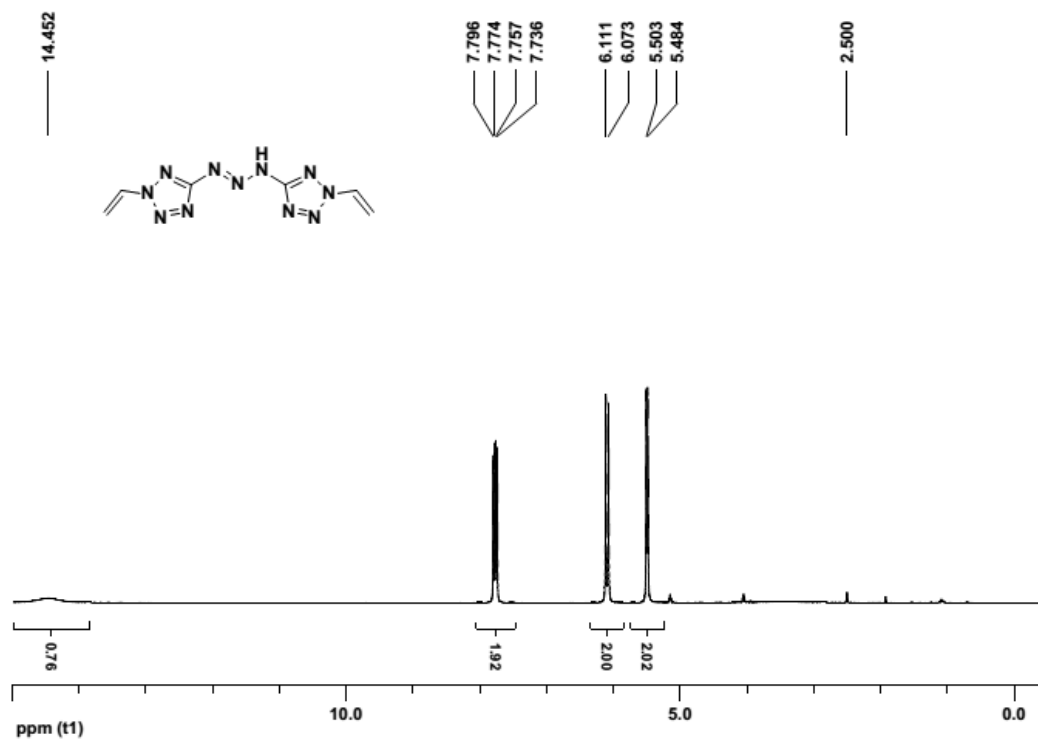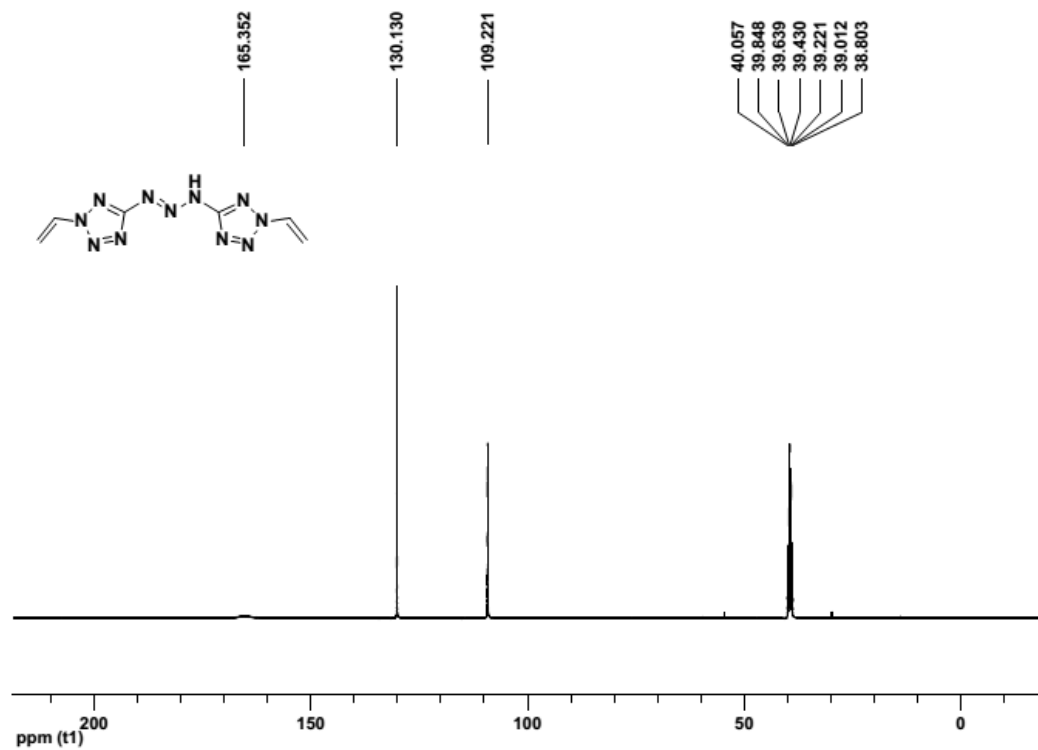

## Infrared

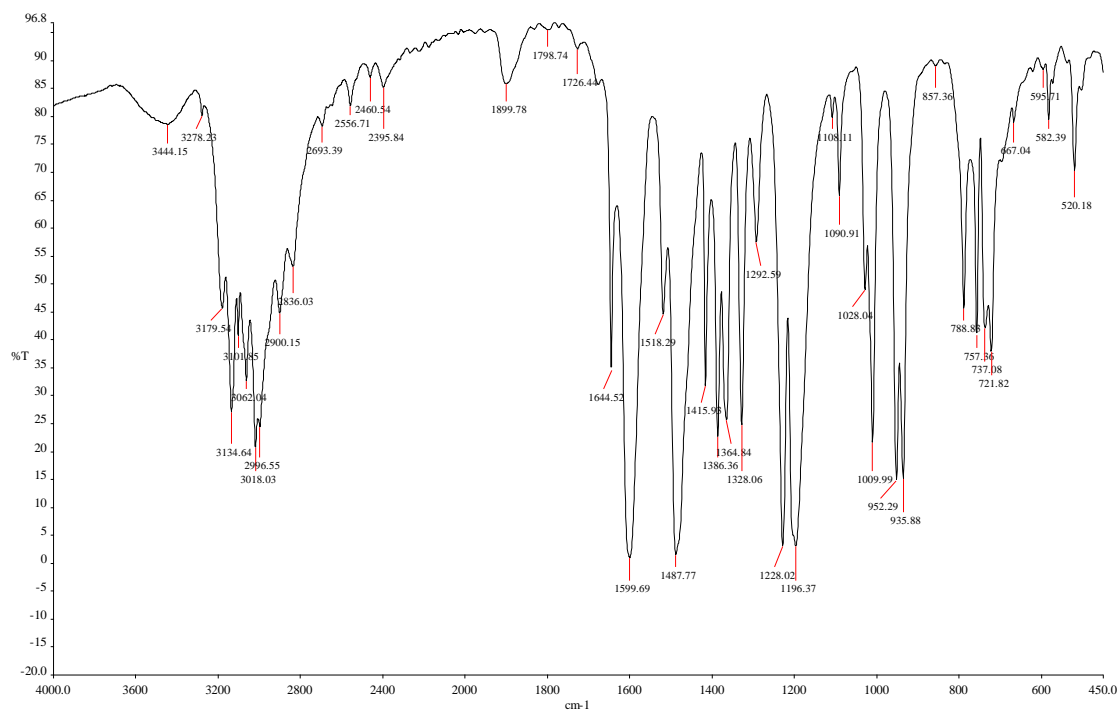

## HRMS

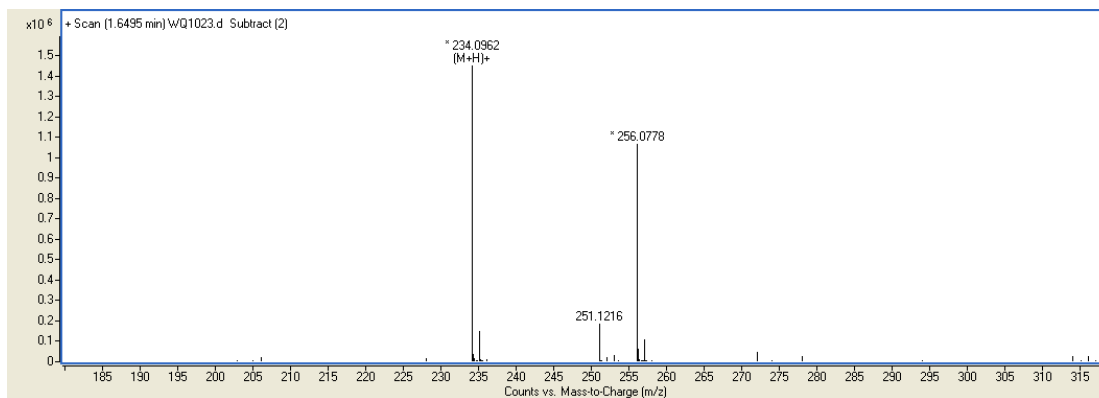

# Spectral data of 1i

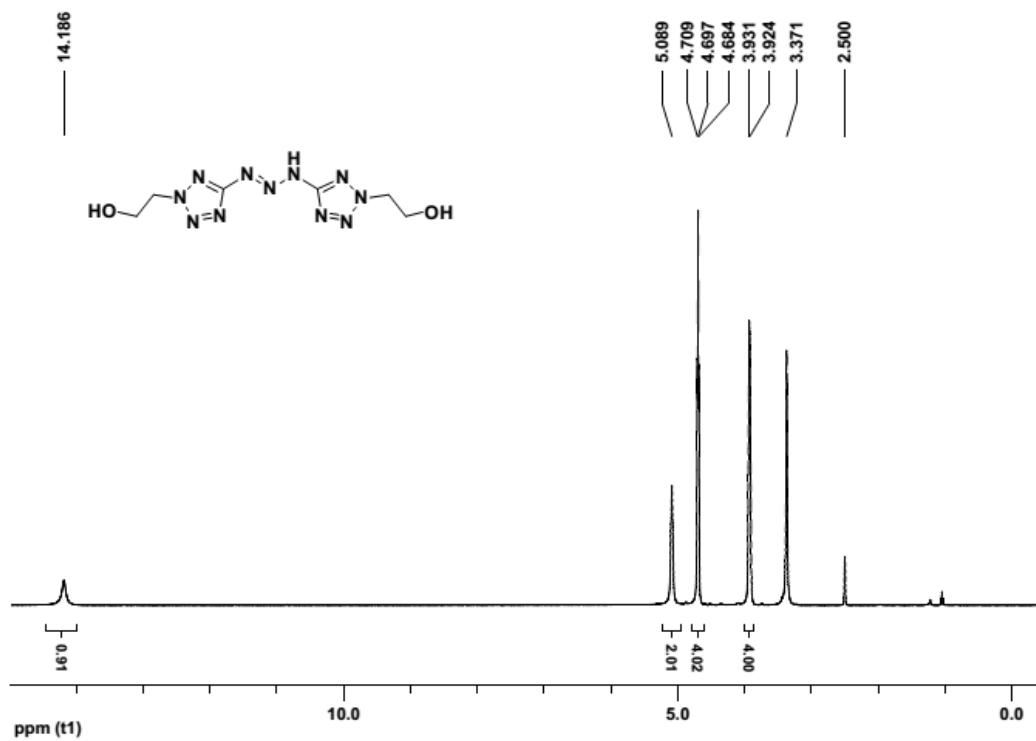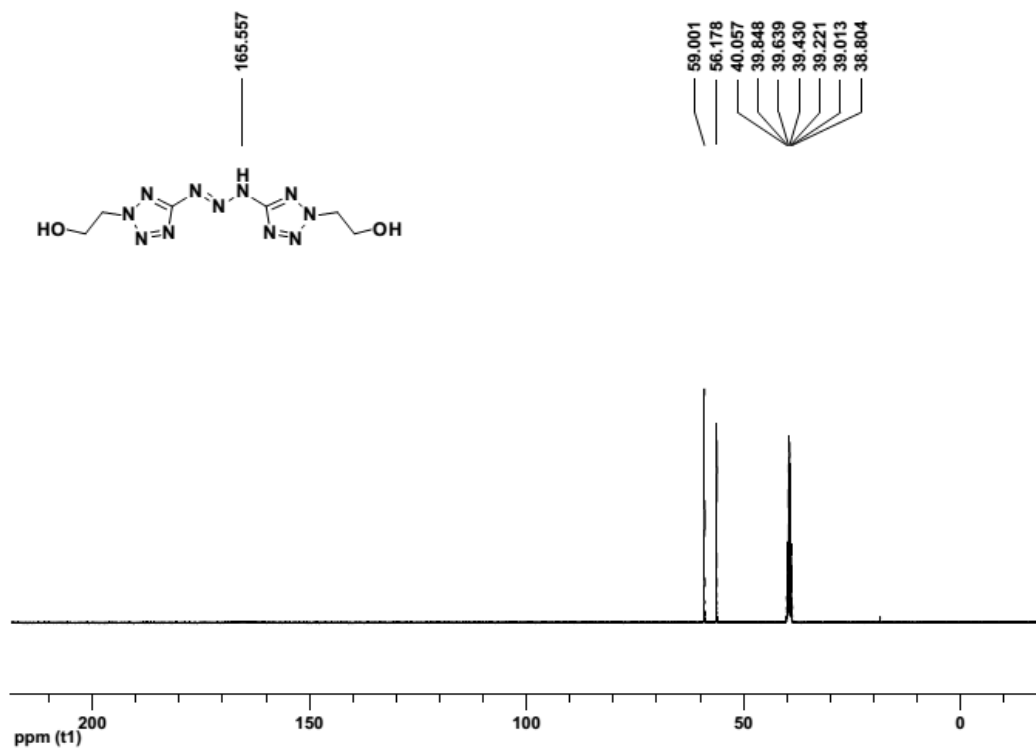

# Infrared

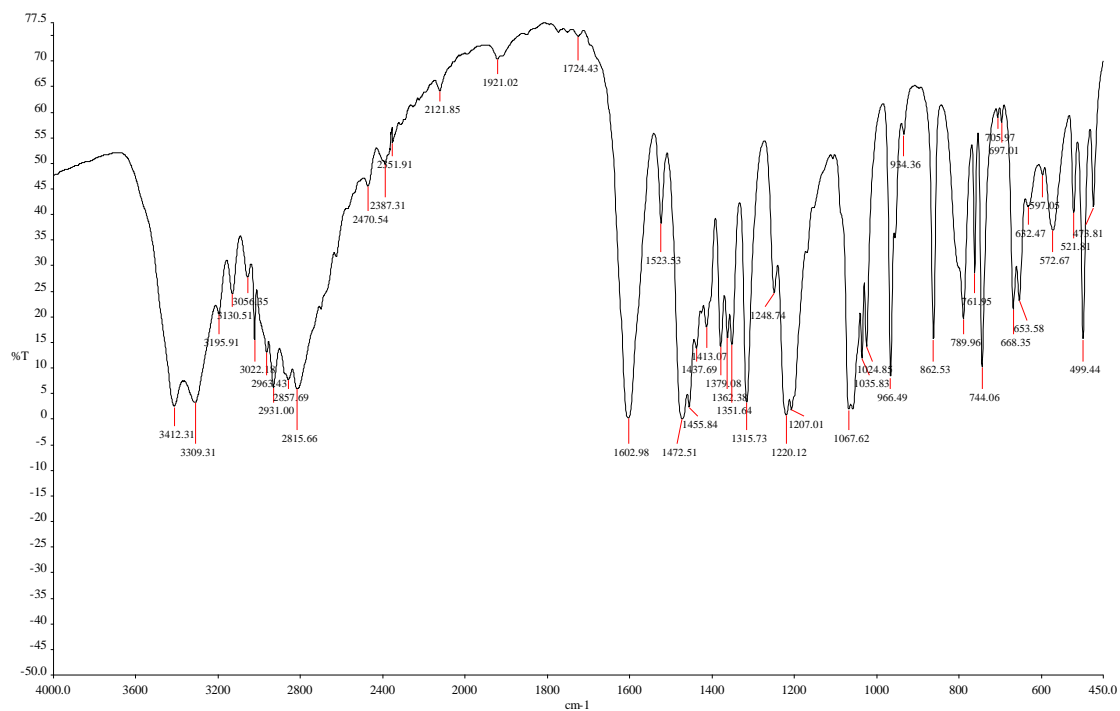

# HRMS

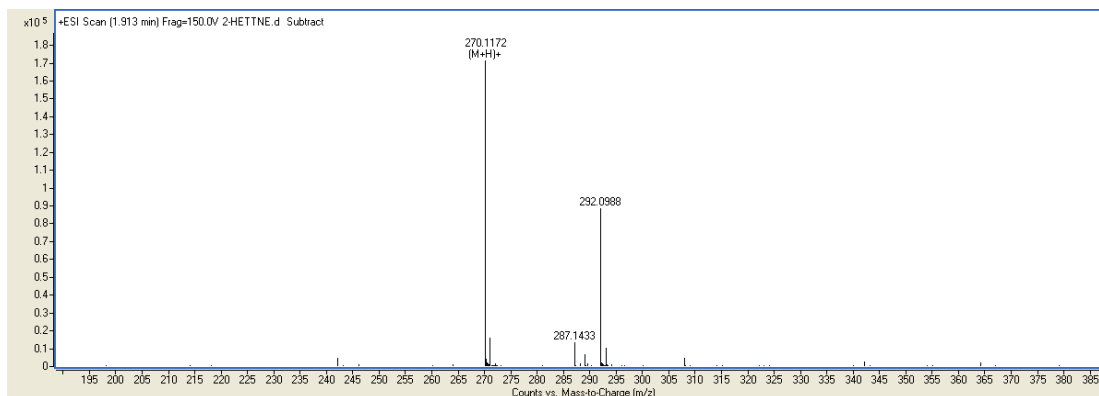

# Spectral data of 2a

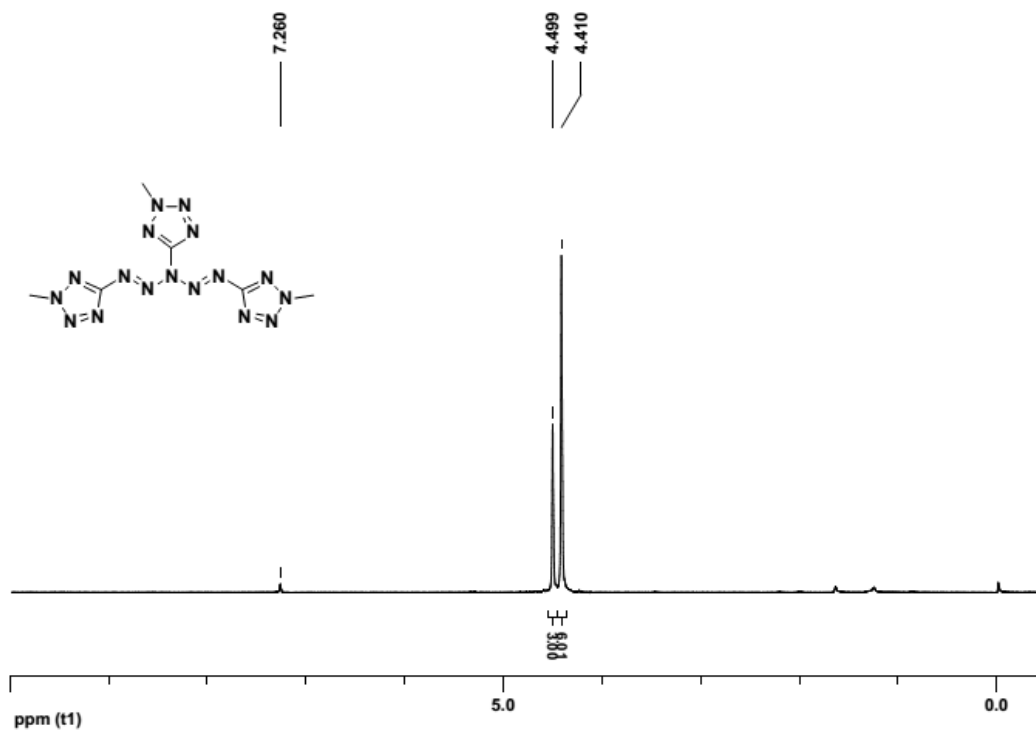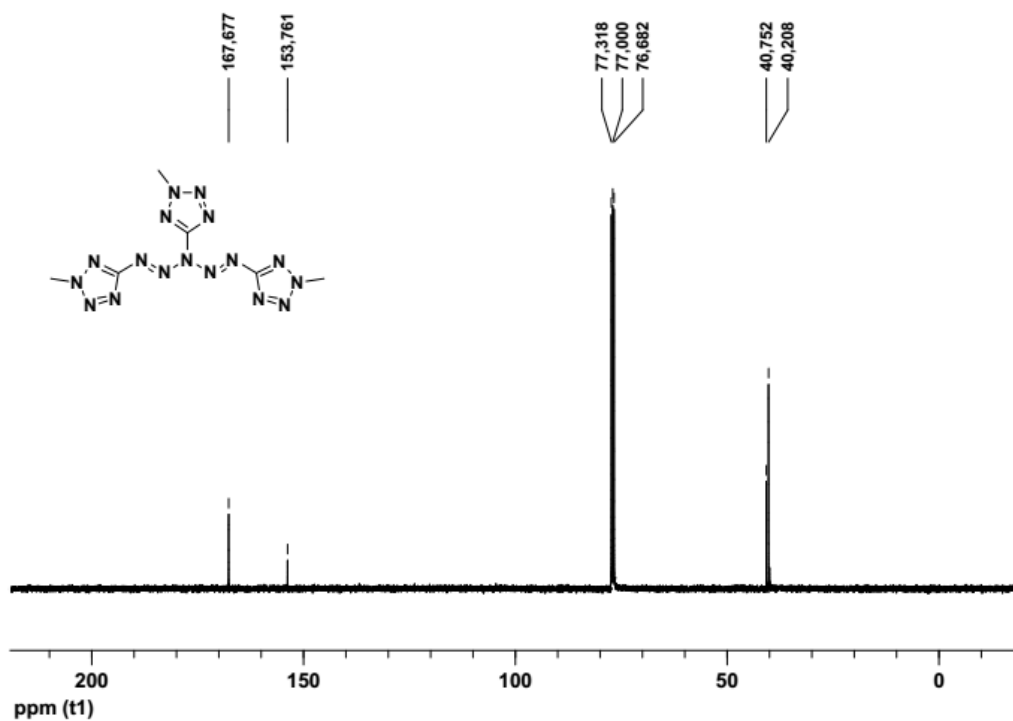

# DSC

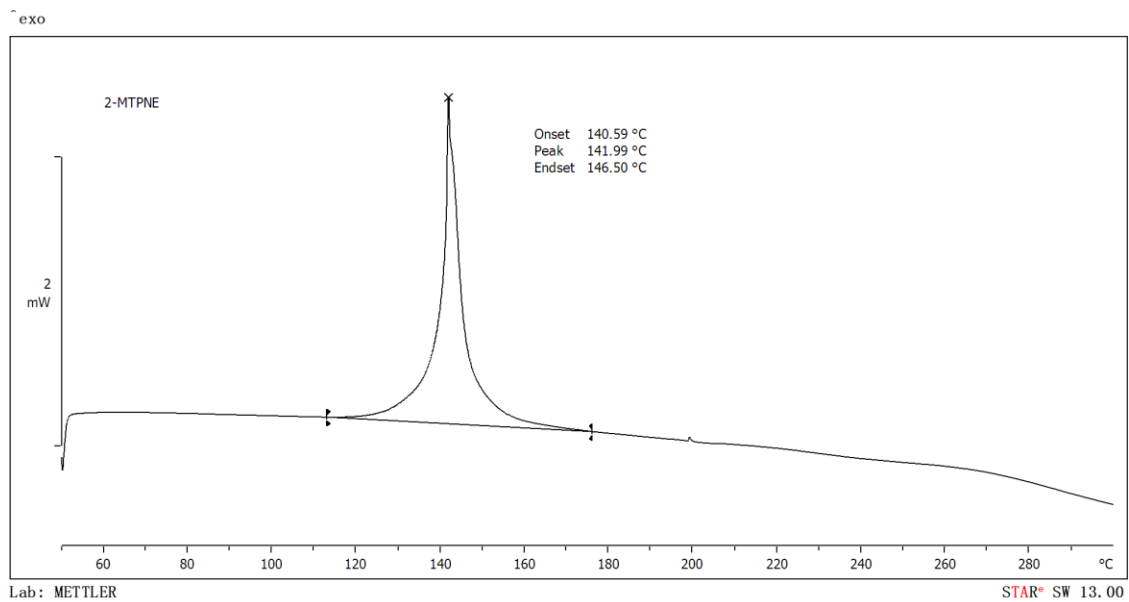

# Infrared

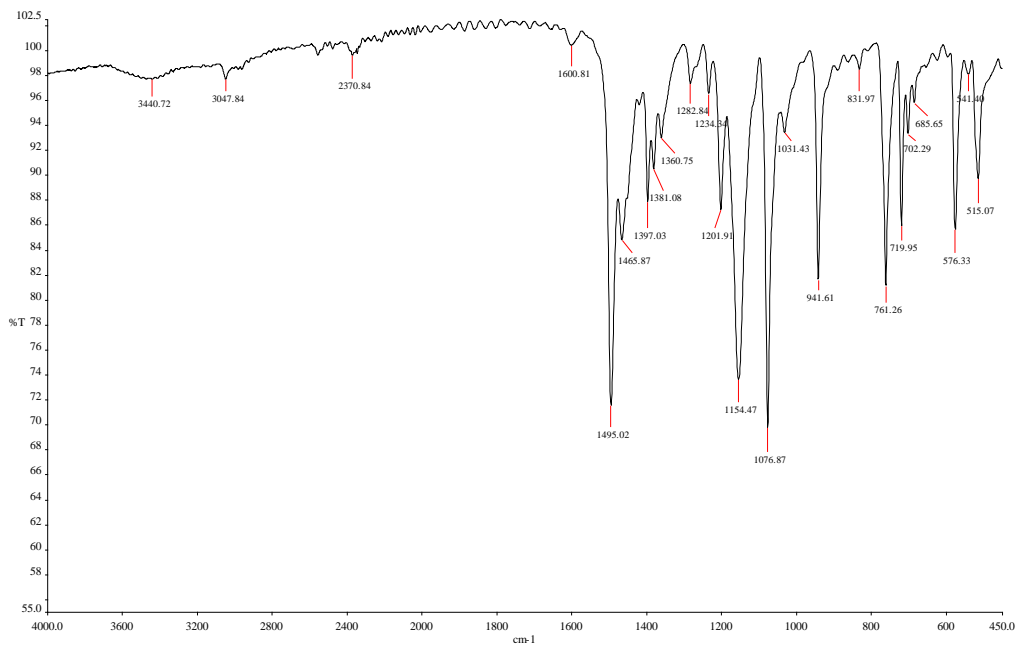

# HRMS

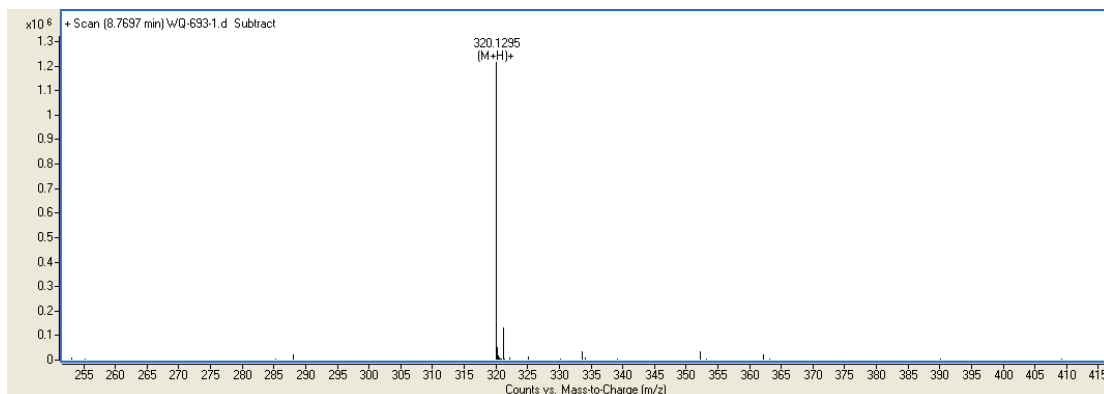

# Spectral data of 2b

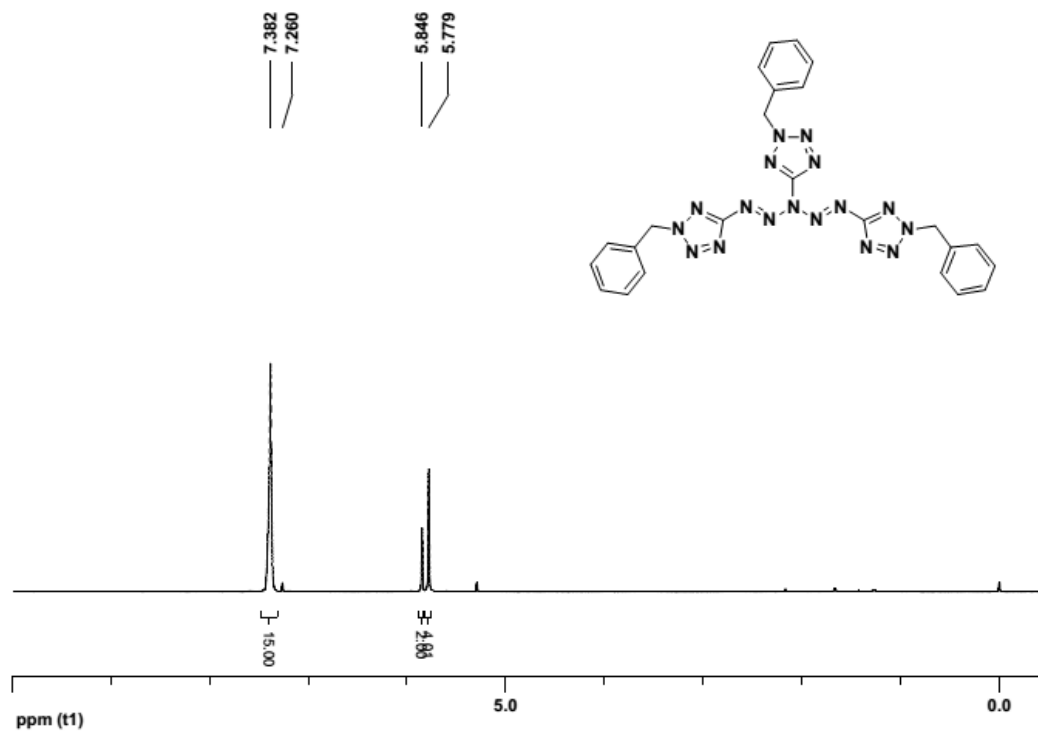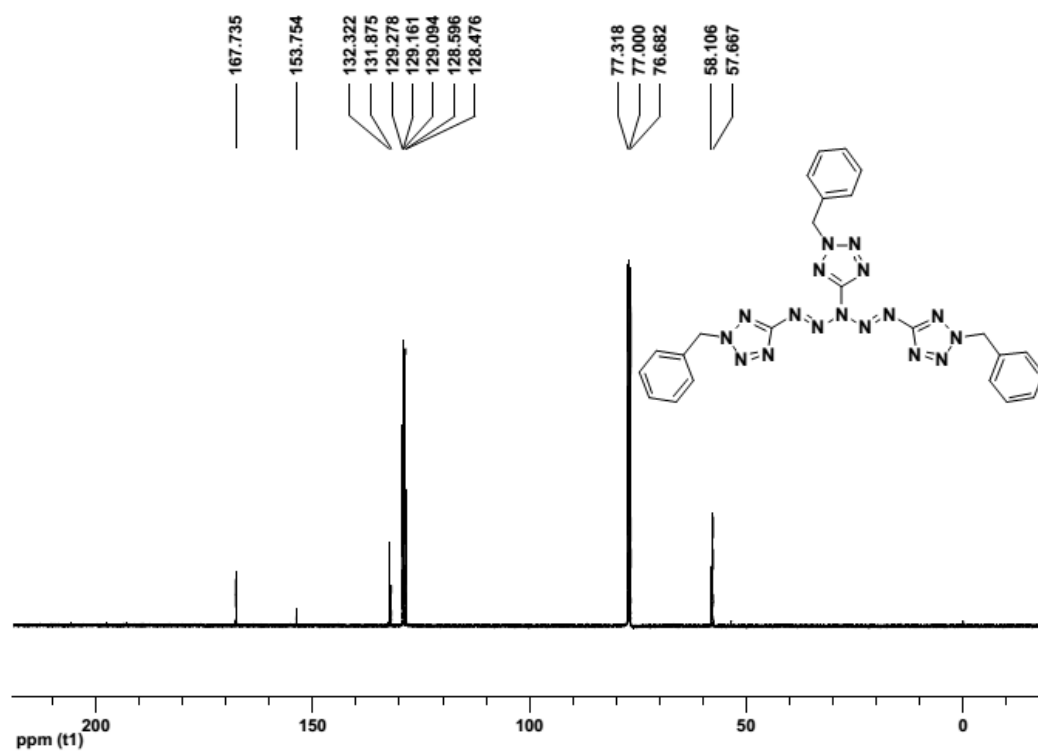



# DSC

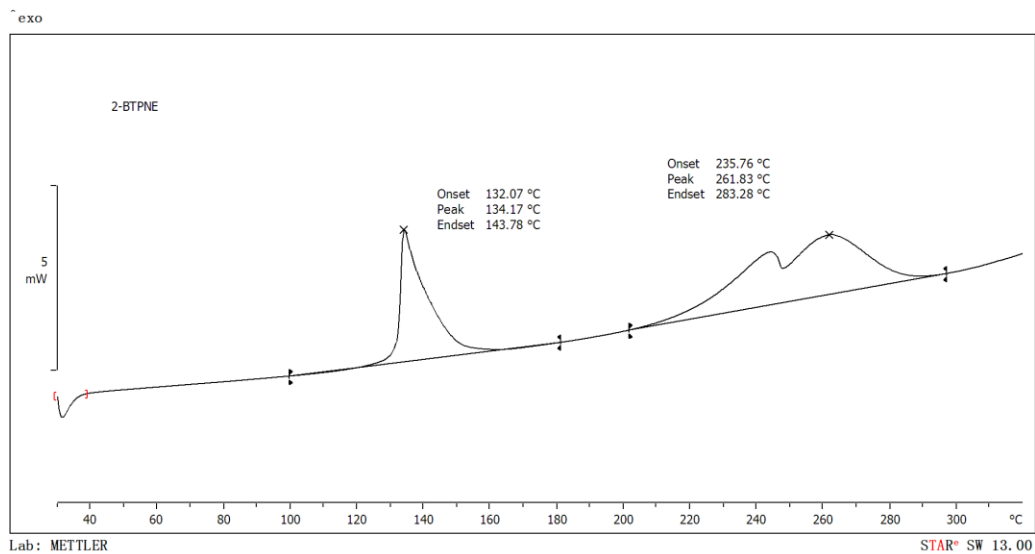

# Infrared

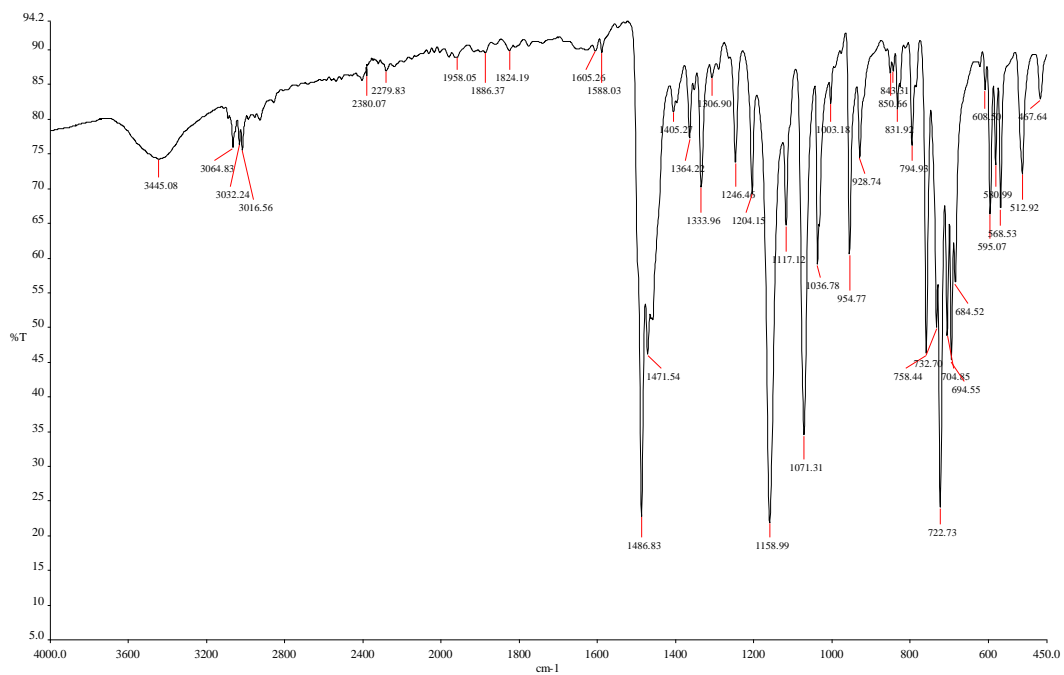

# HRMS

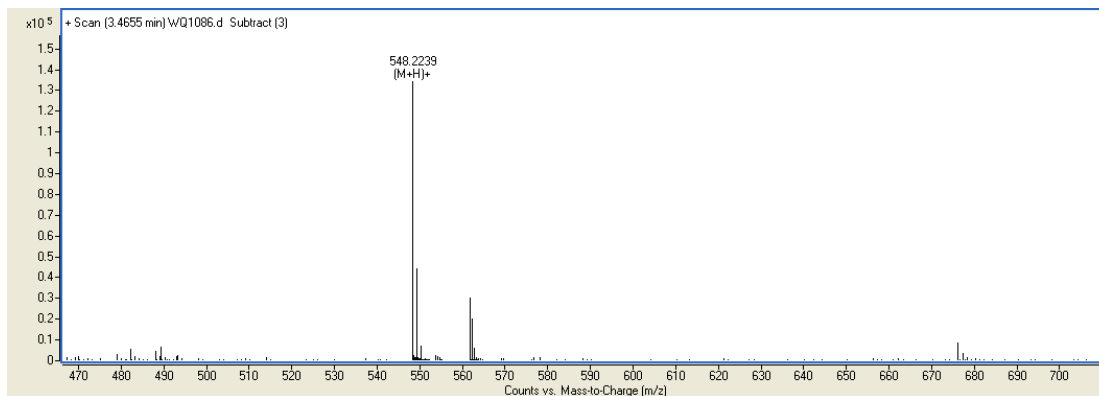

# Spectral data of 2c

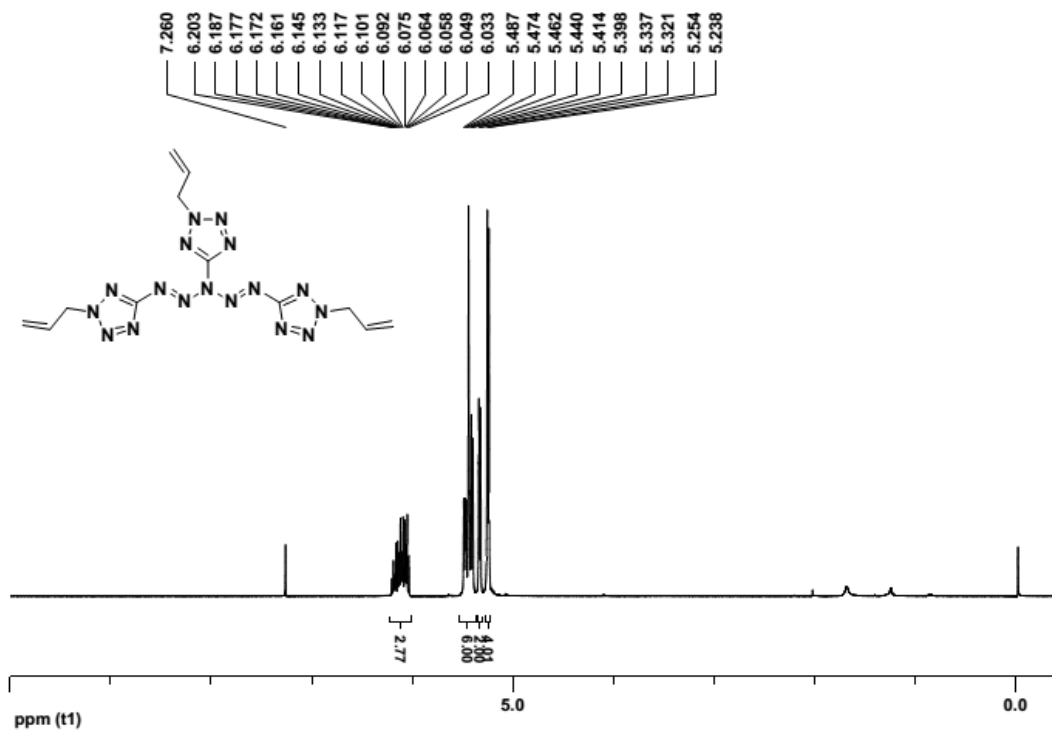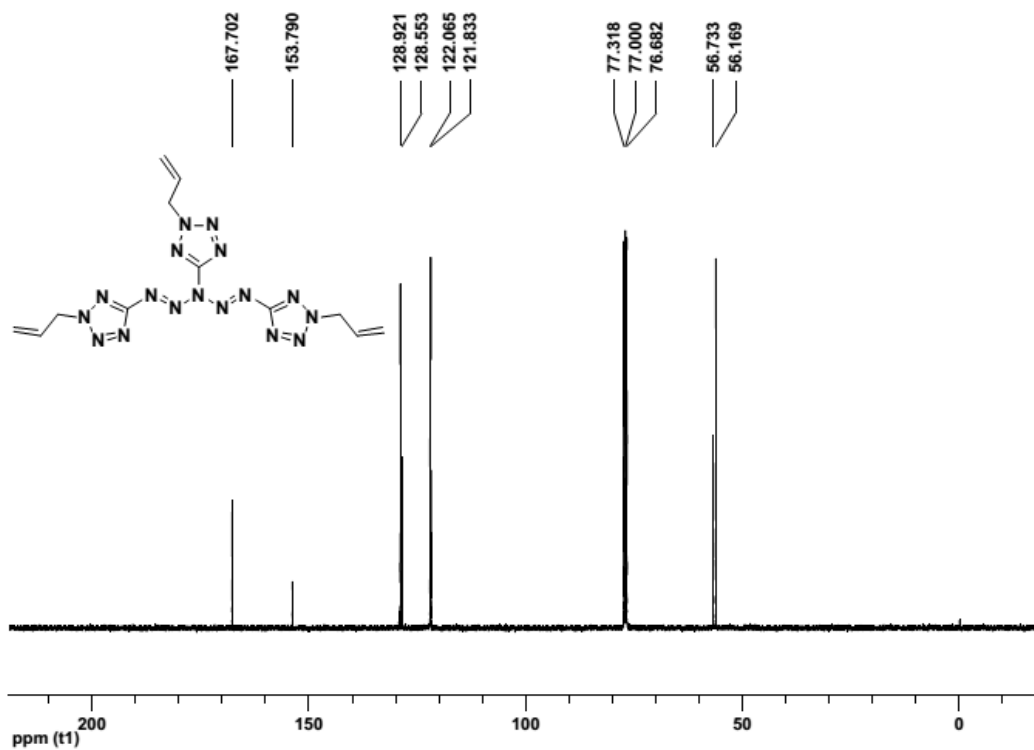

# DSC

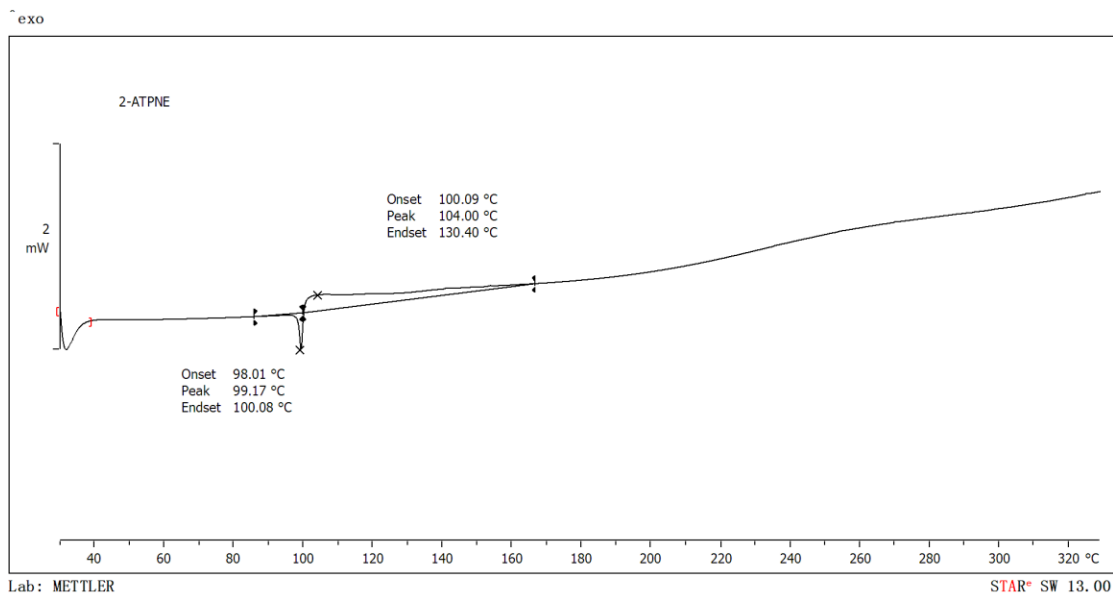

# Infrared

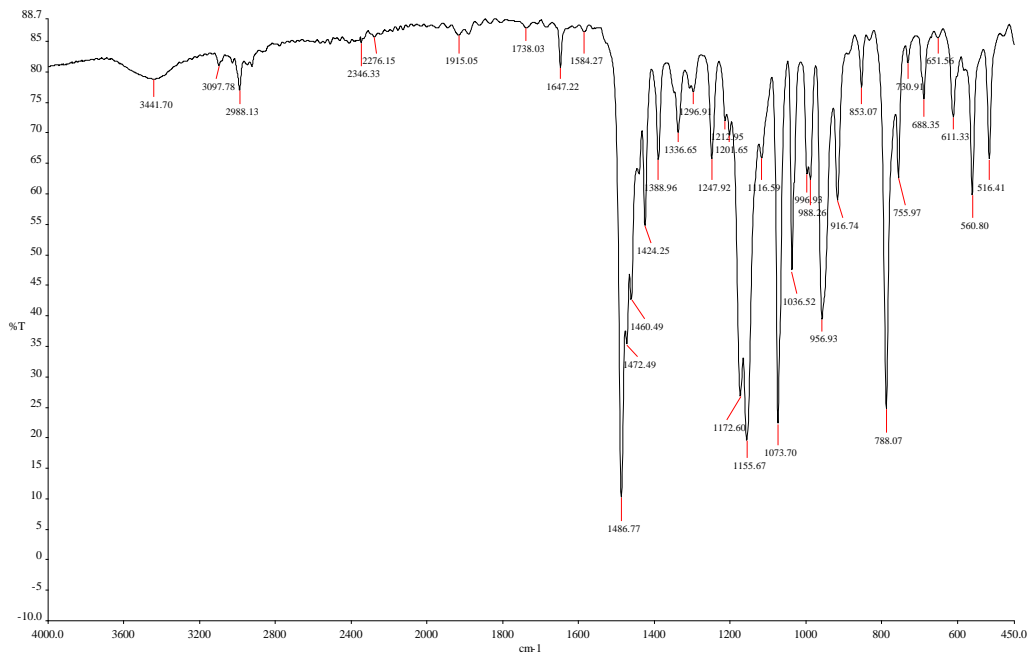

# HRMS

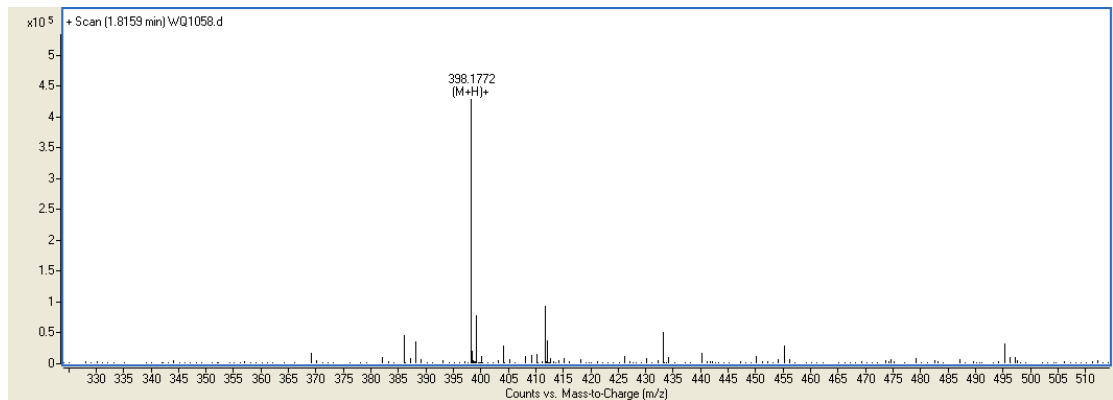

# Spectral data of 2d

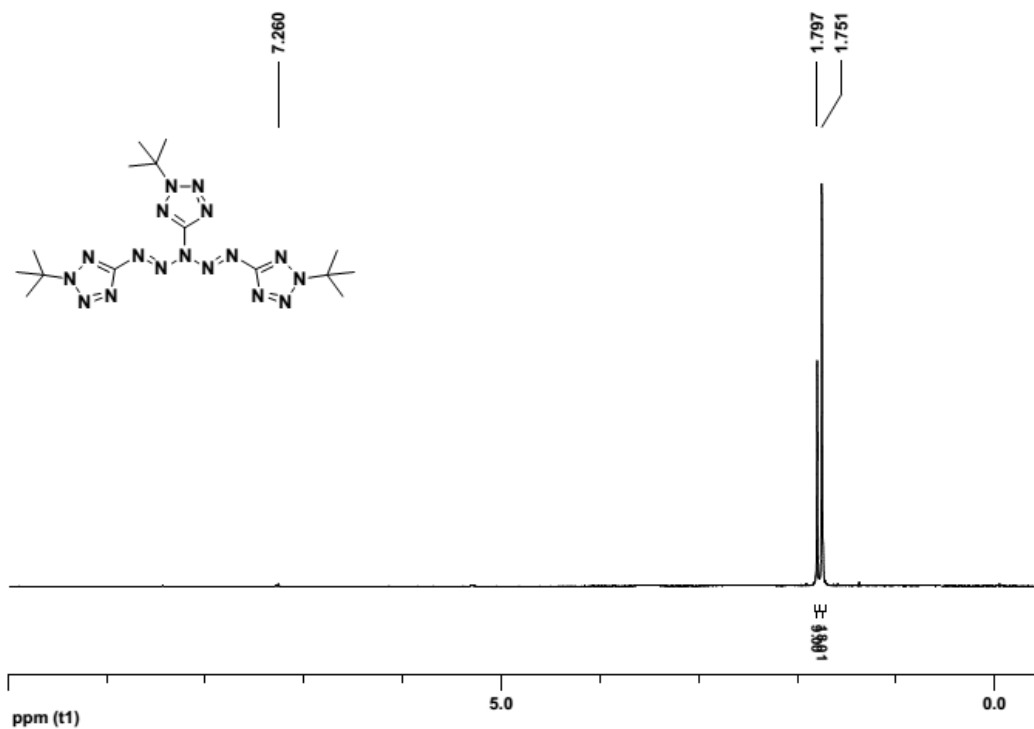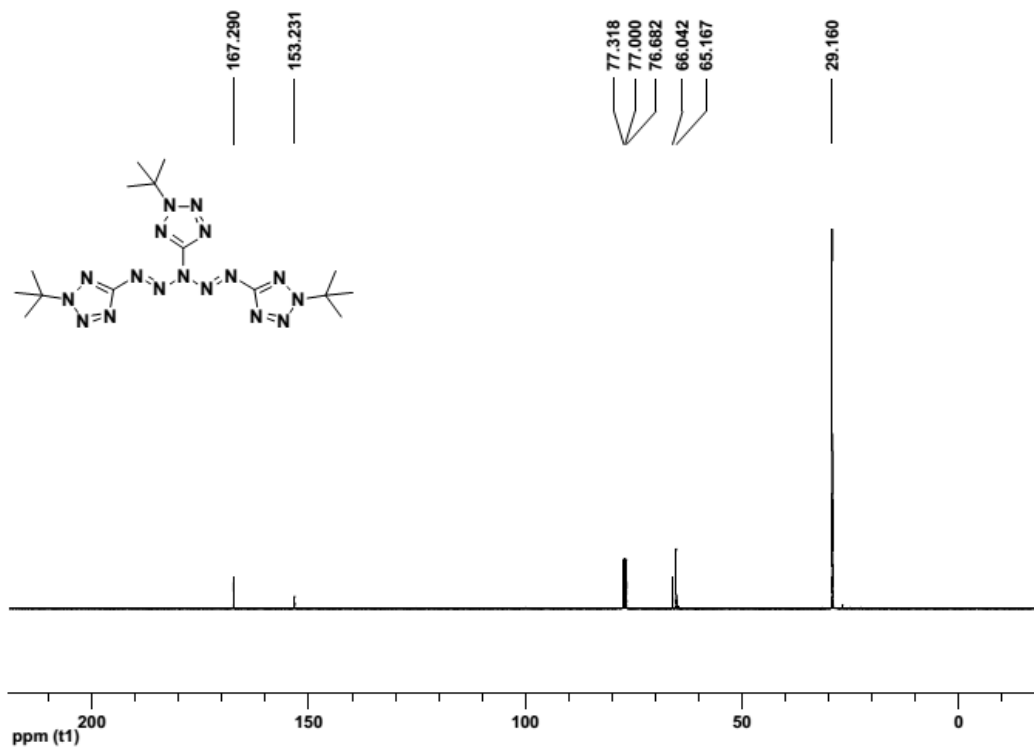

# DSC

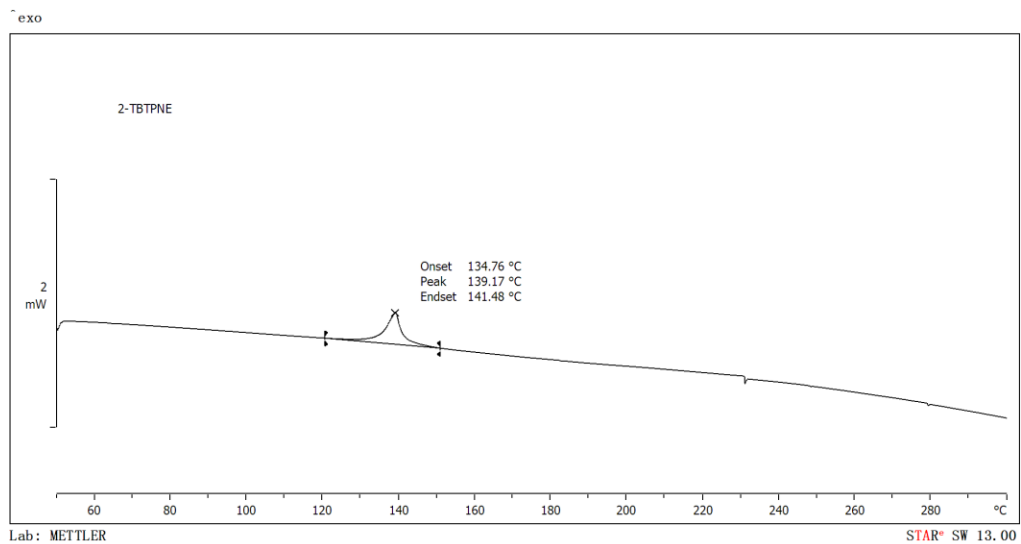

# Infrared

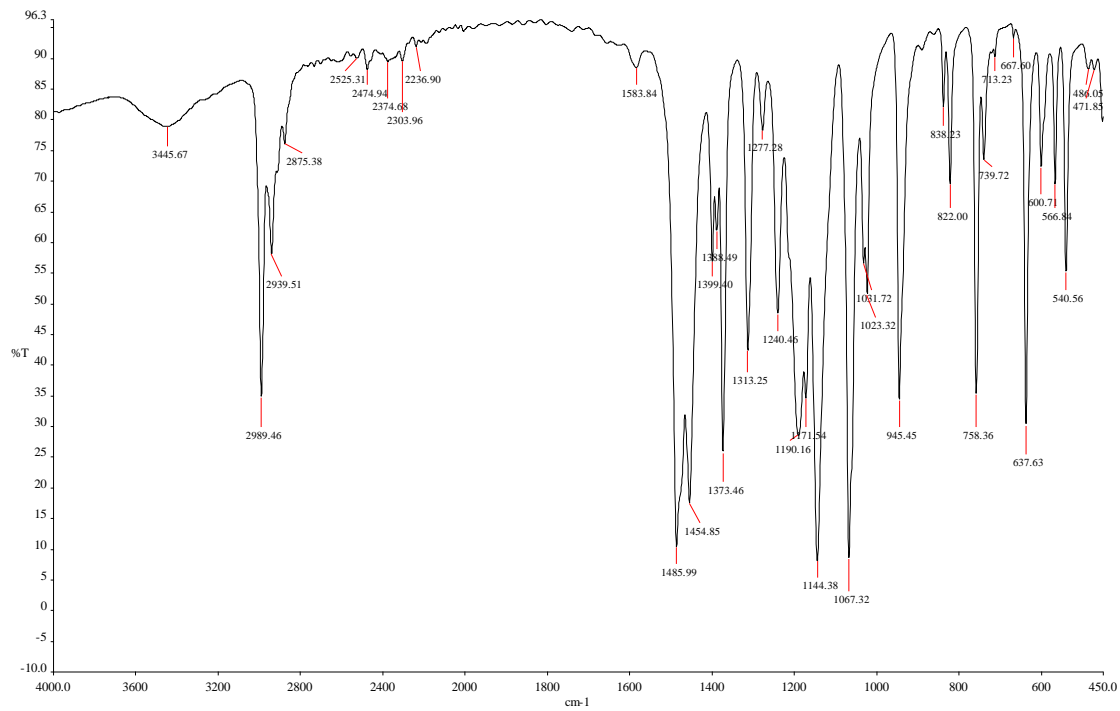

# HRMS

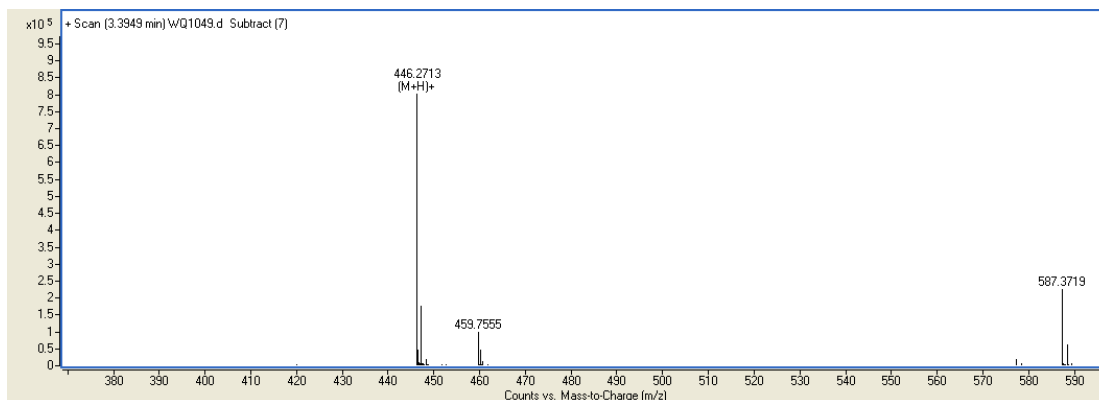

Spectral data of 2e

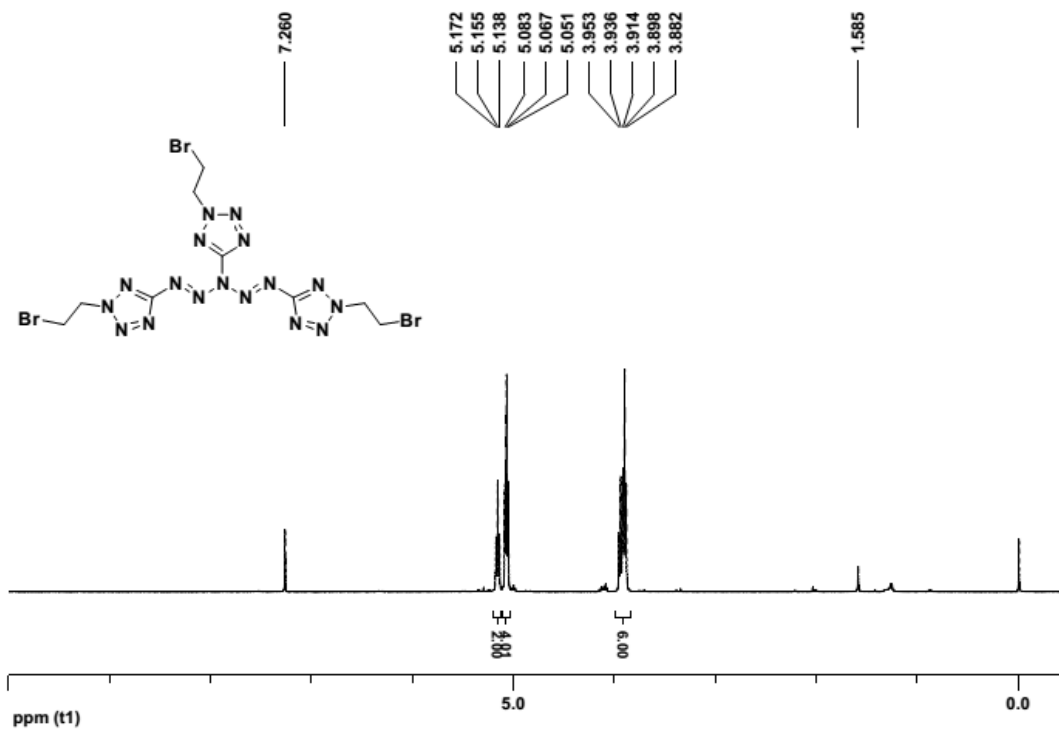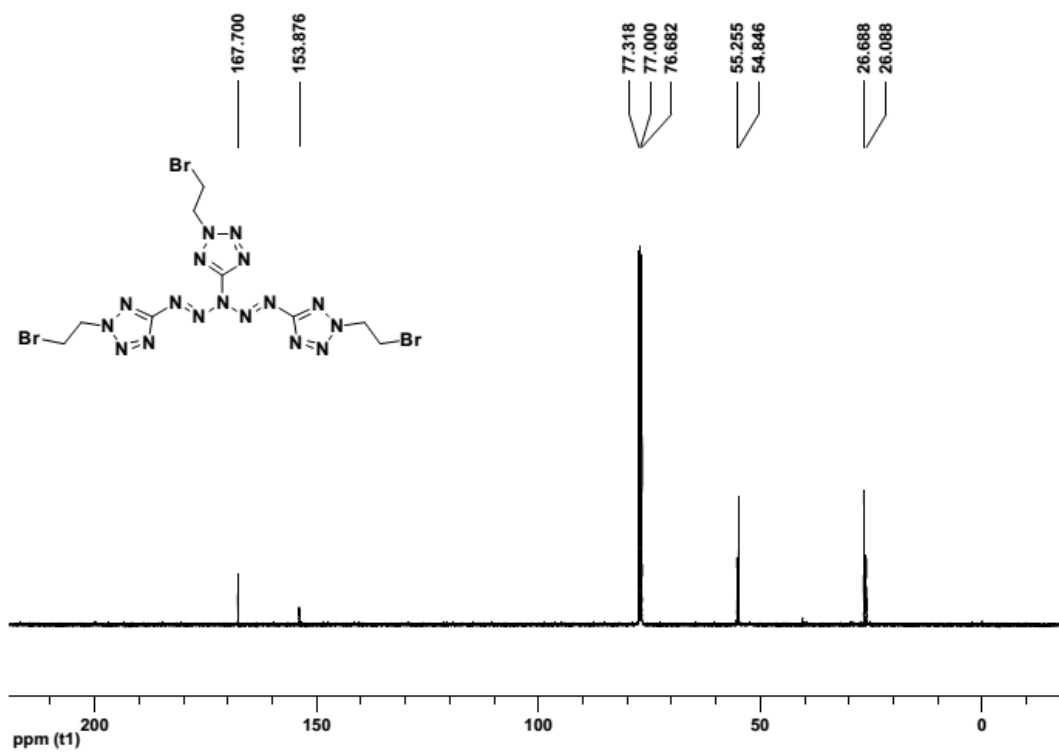

# DSC

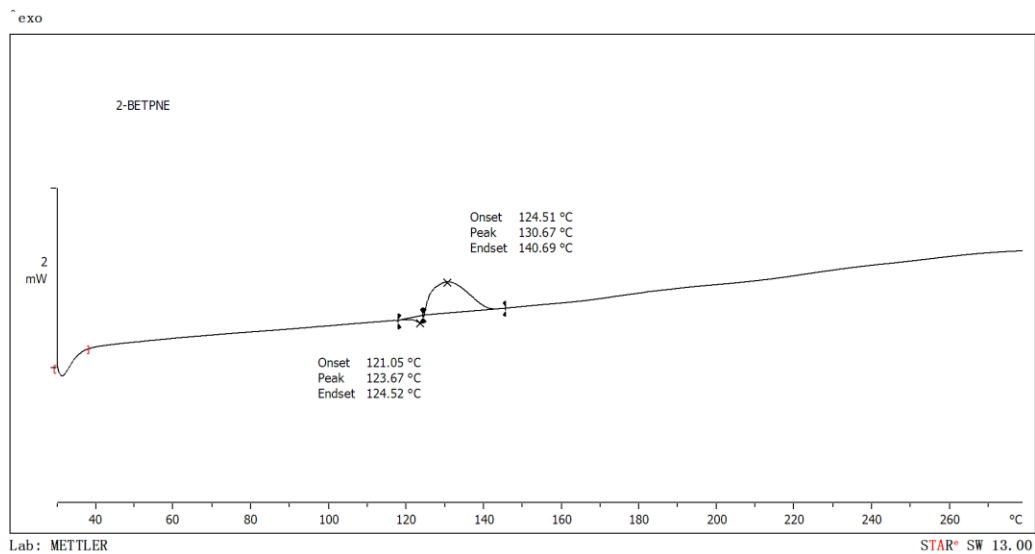

# Infrared

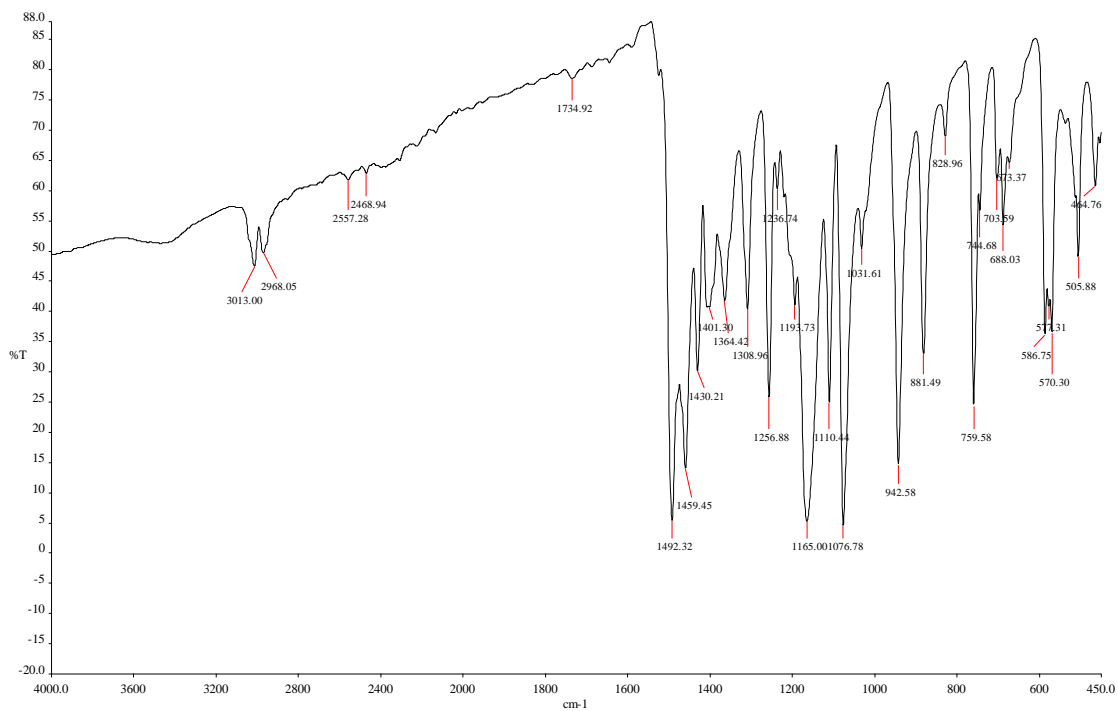

# HRMS

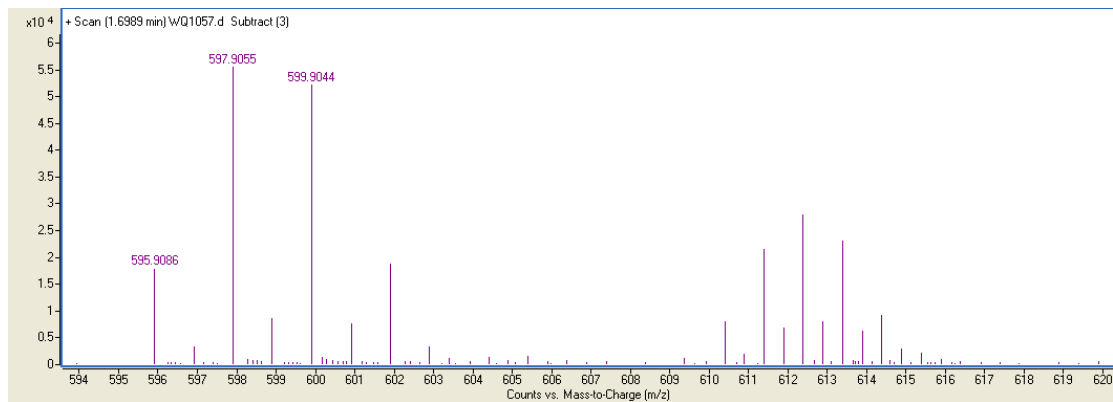

# Spectral data of 2f

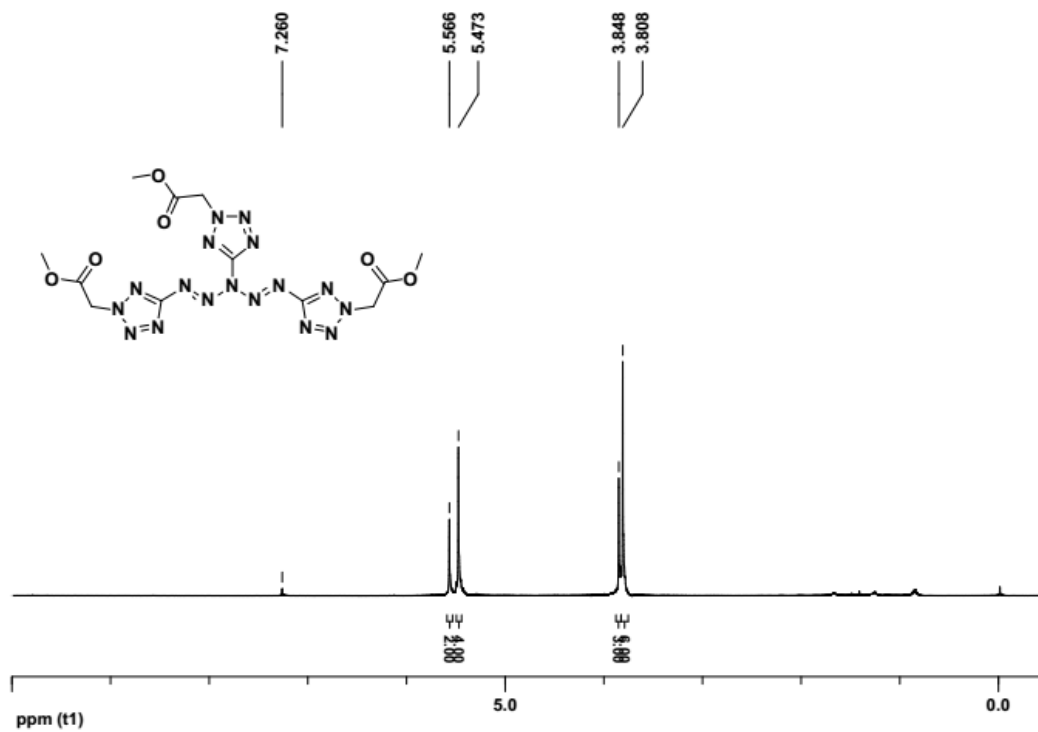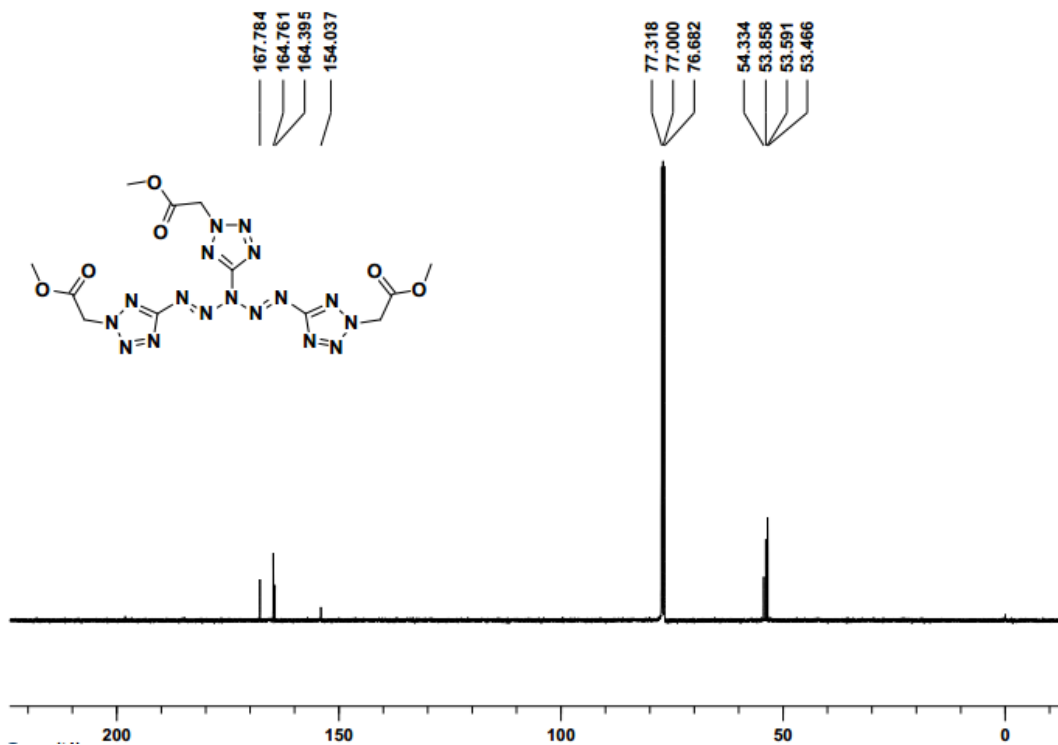



# DSC

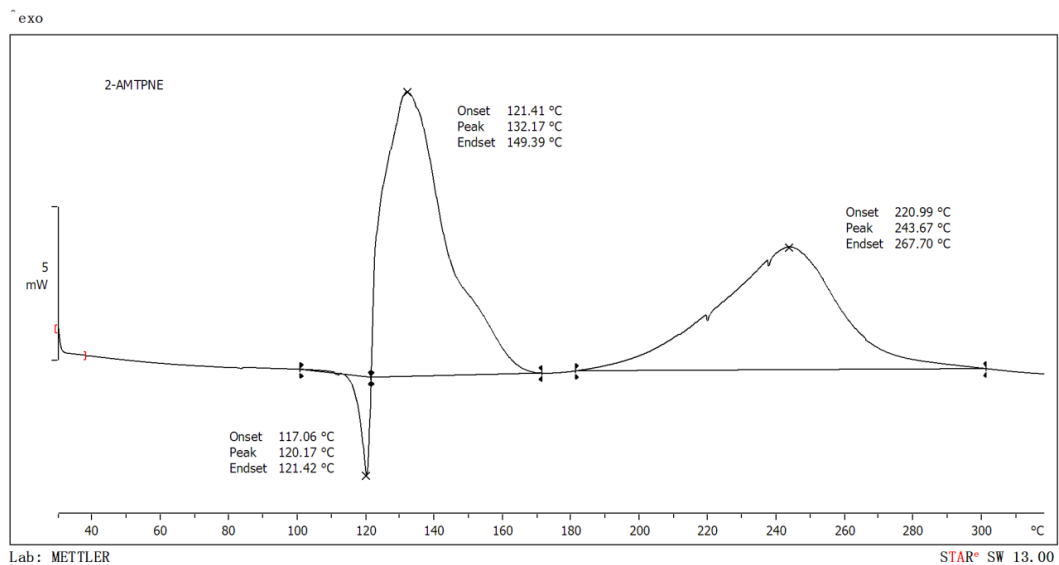

# Infrared

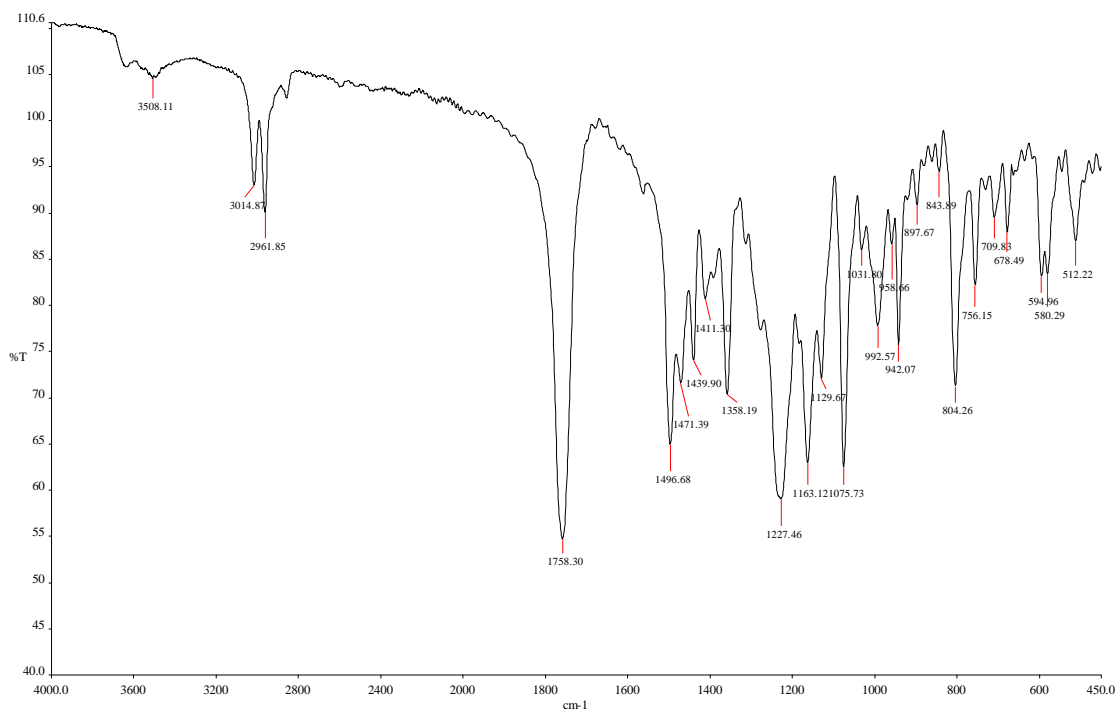

# HRMS

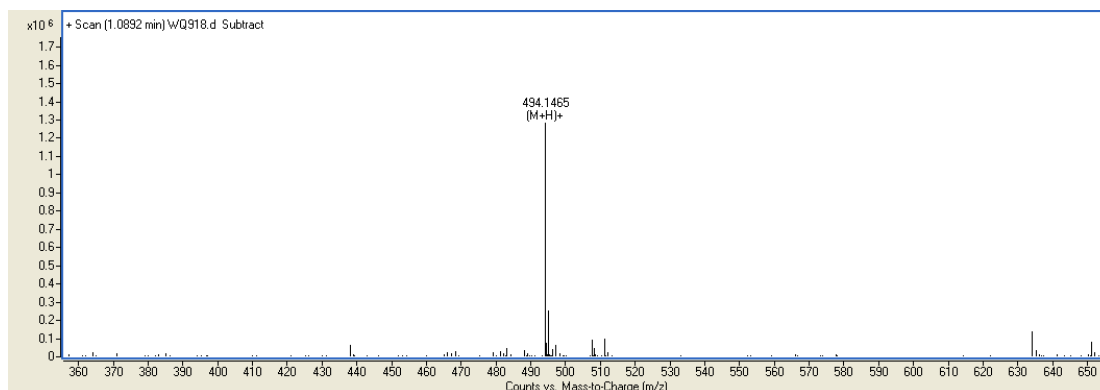

# Spectral data of 2g

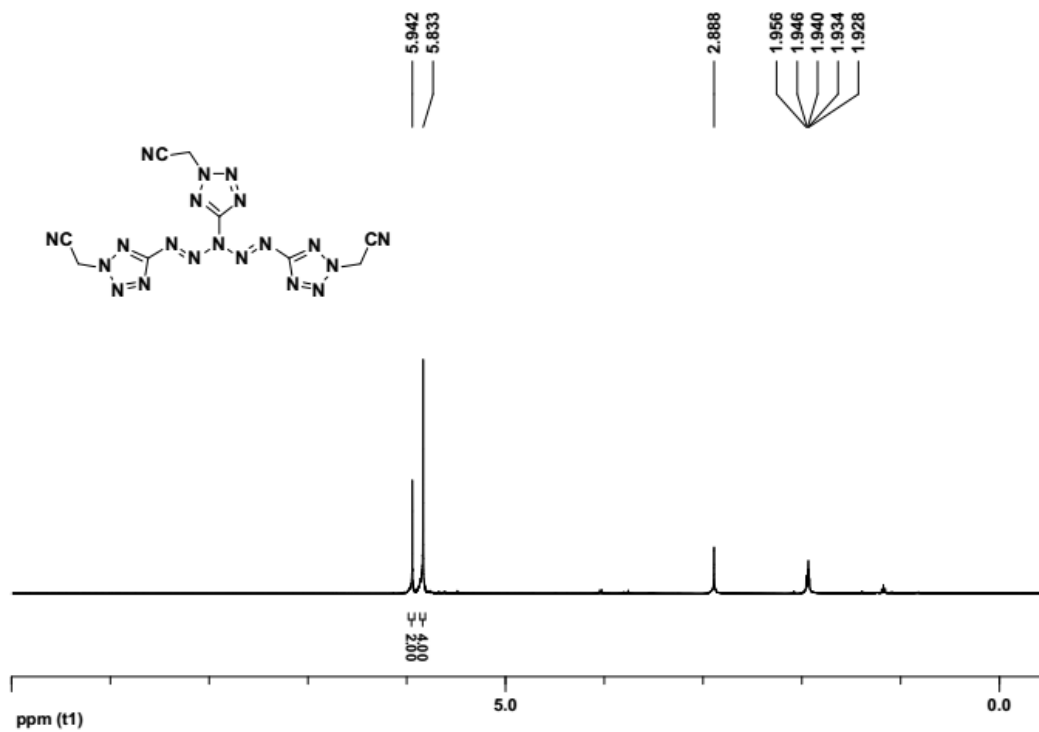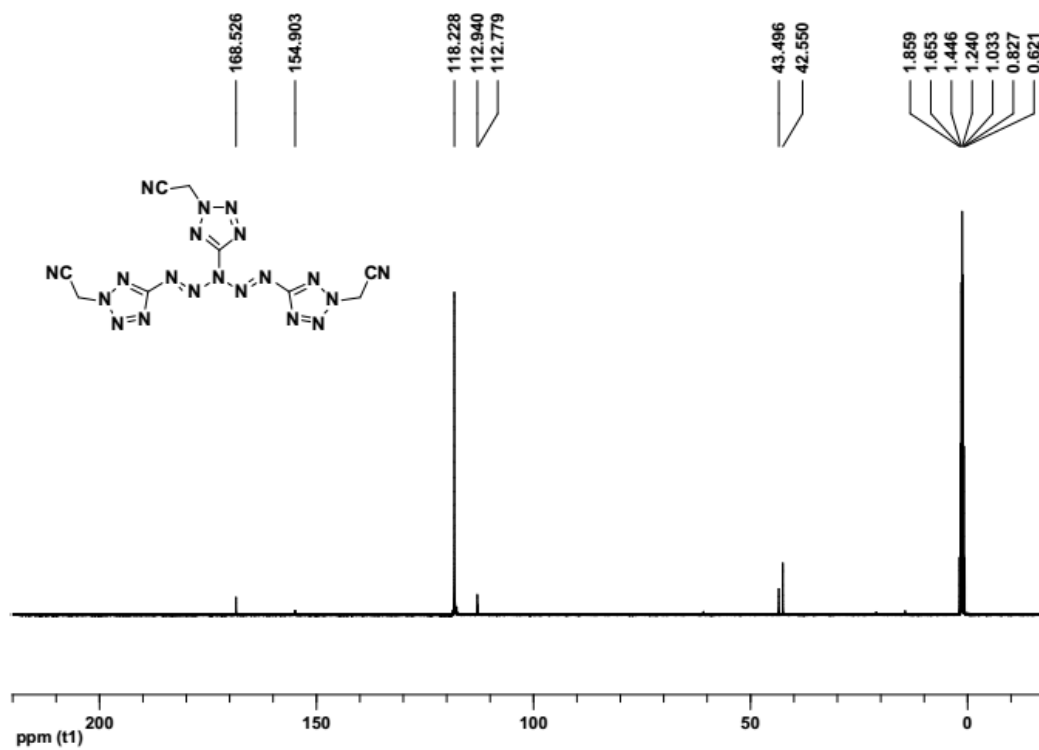

# DSC

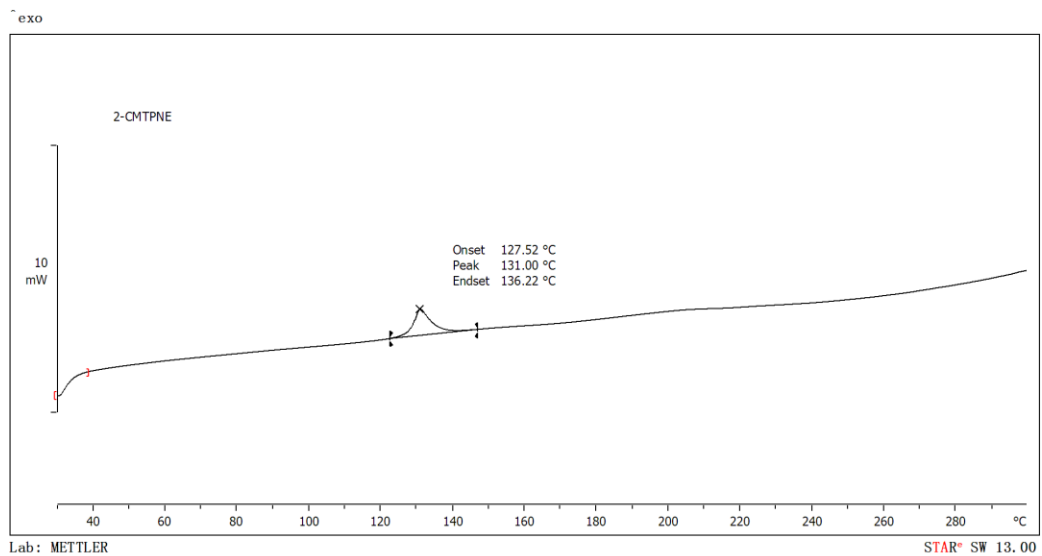

# Infrared

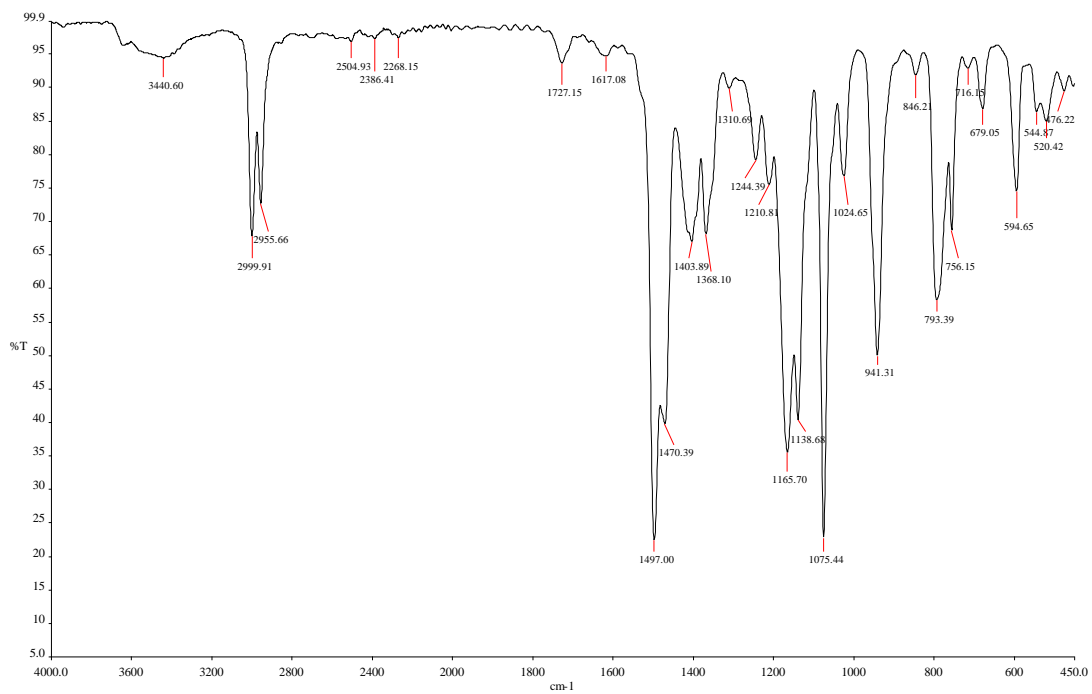

# HRMS

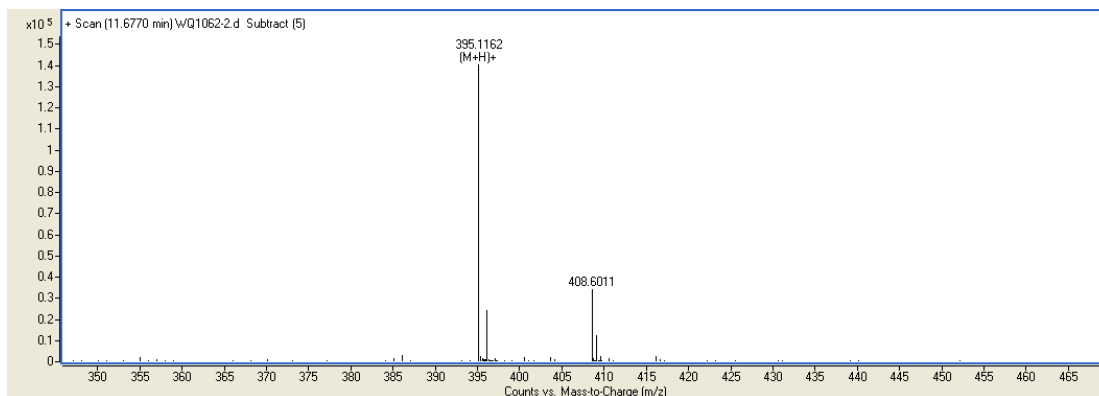

# Spectral data of 2h

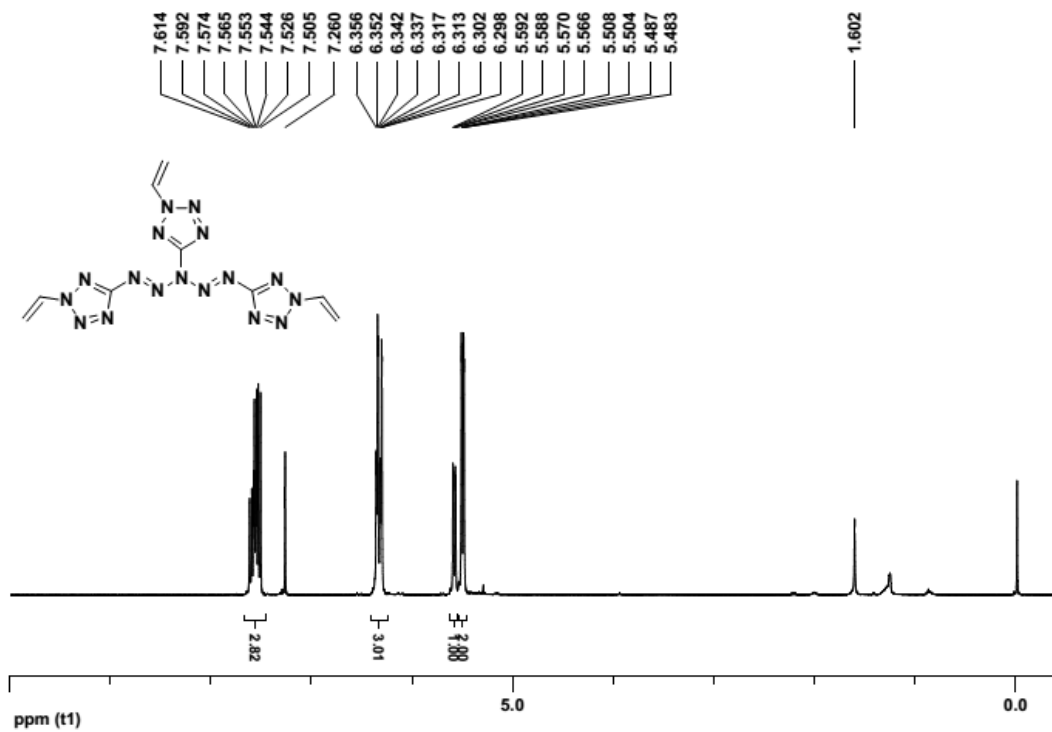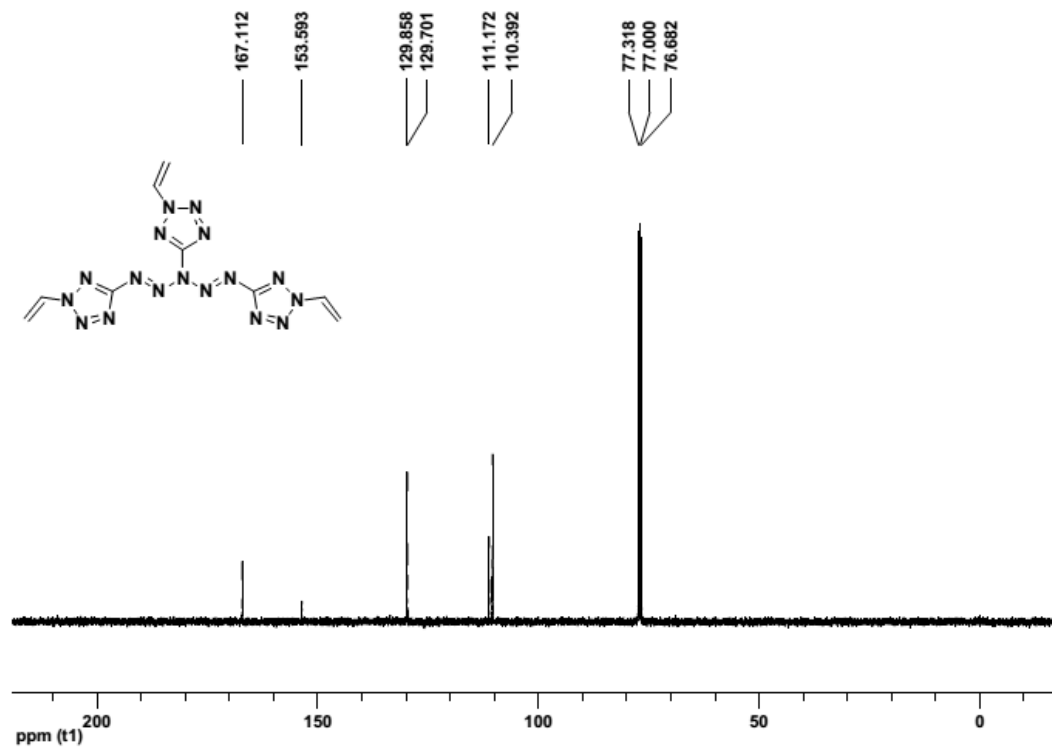

# DSC

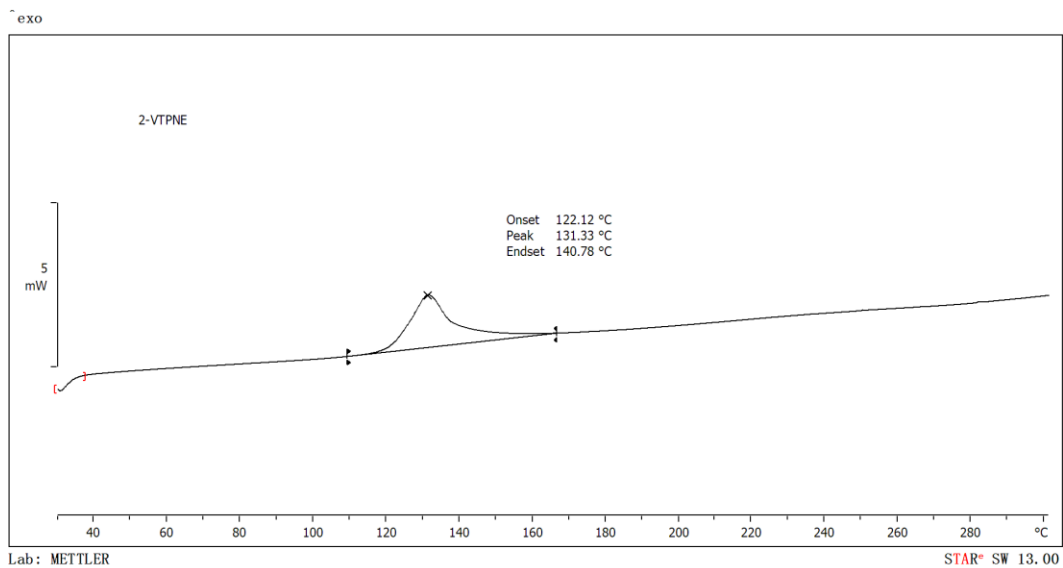

# Infrared

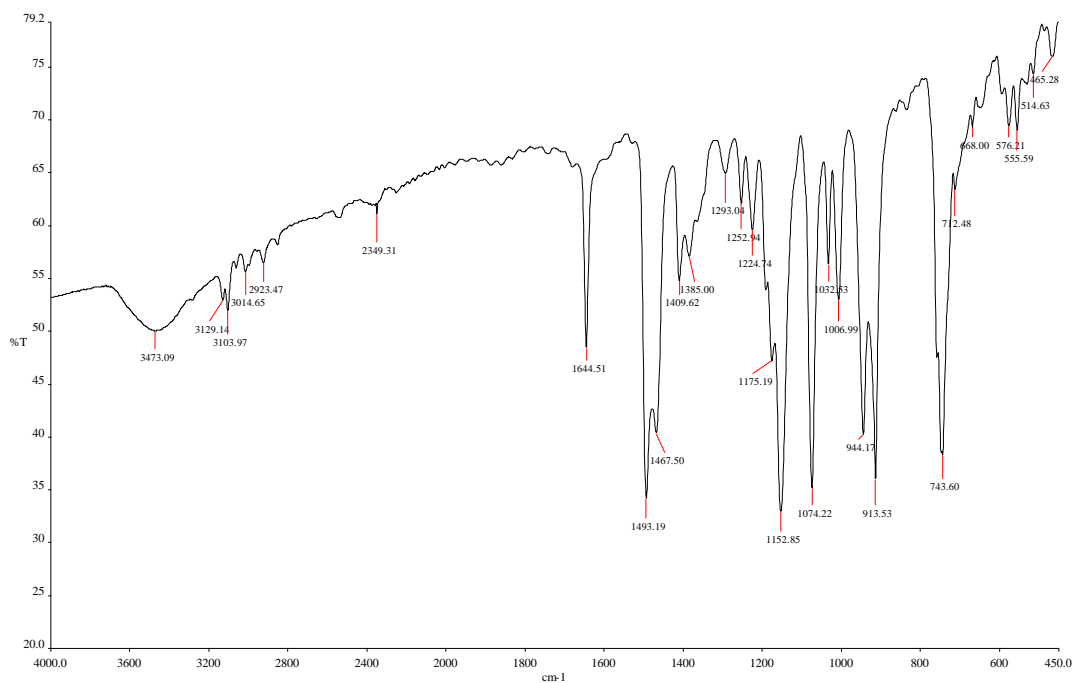

# HRMS

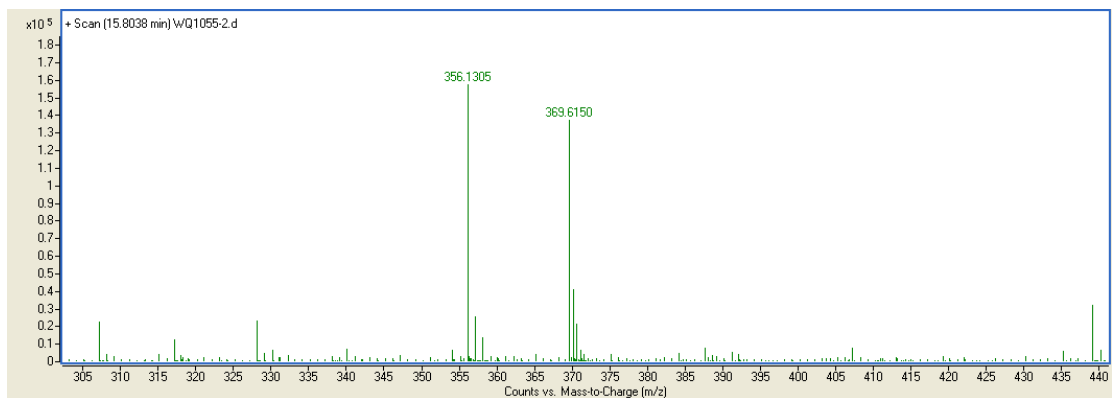

Spectral data of 2i

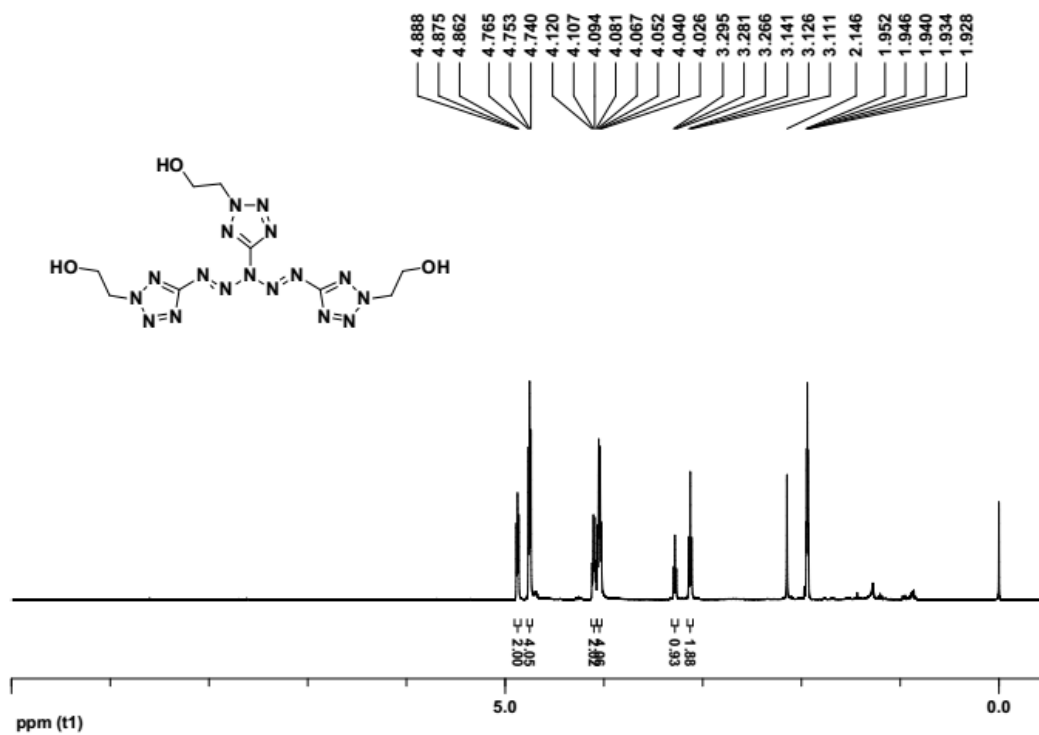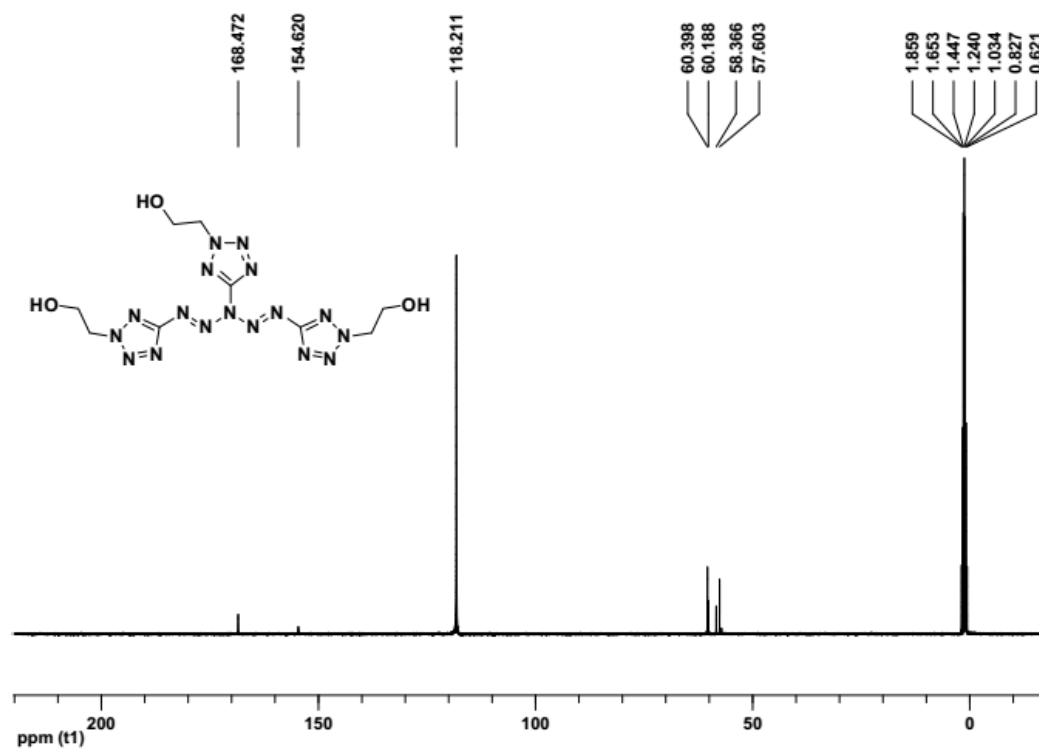

# DSC

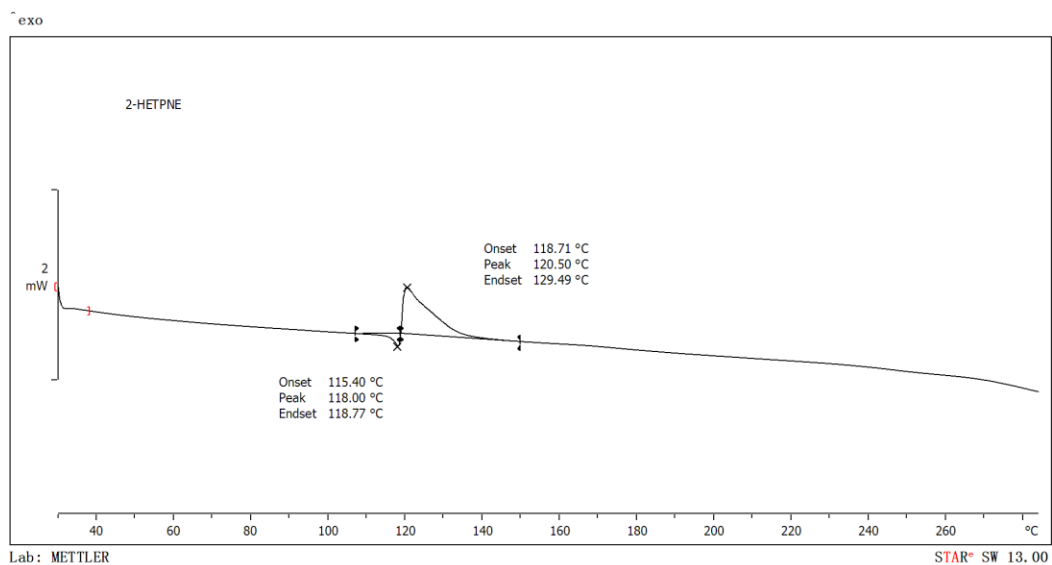

# Infrared

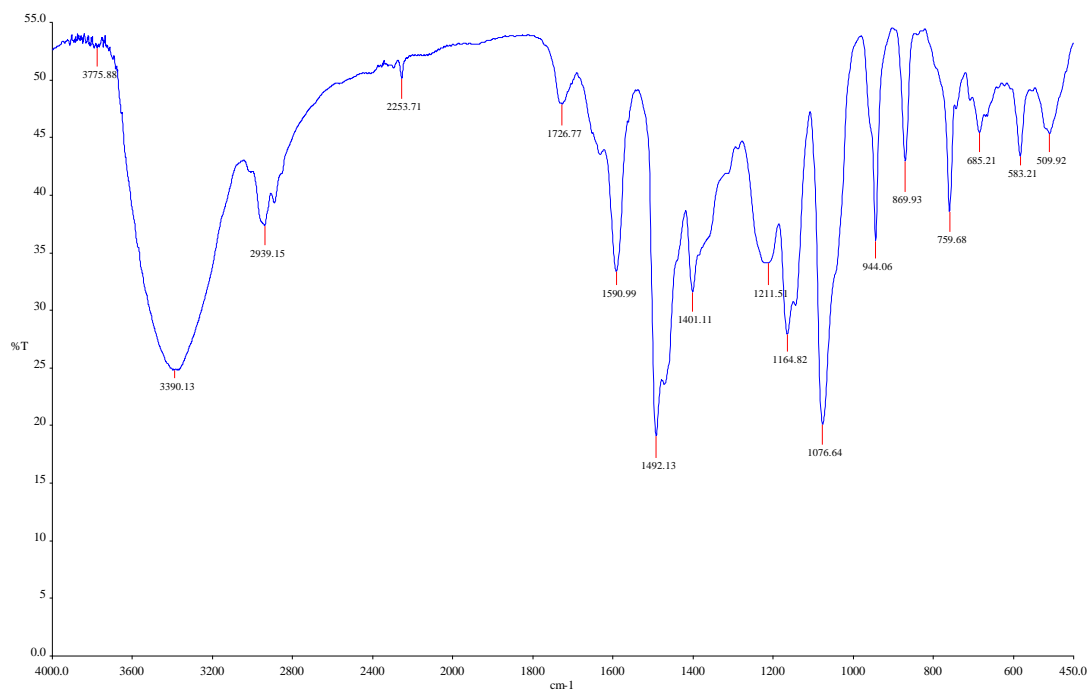

# HRMS

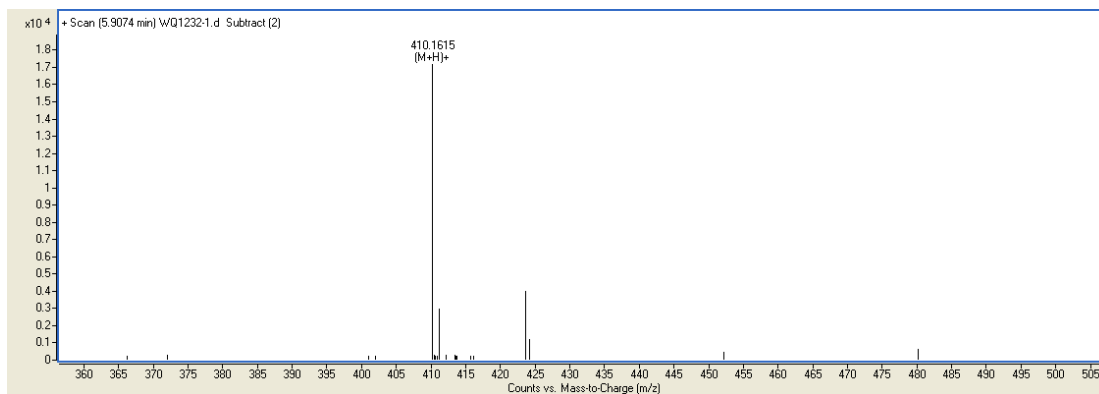

# Spectral data of 2j

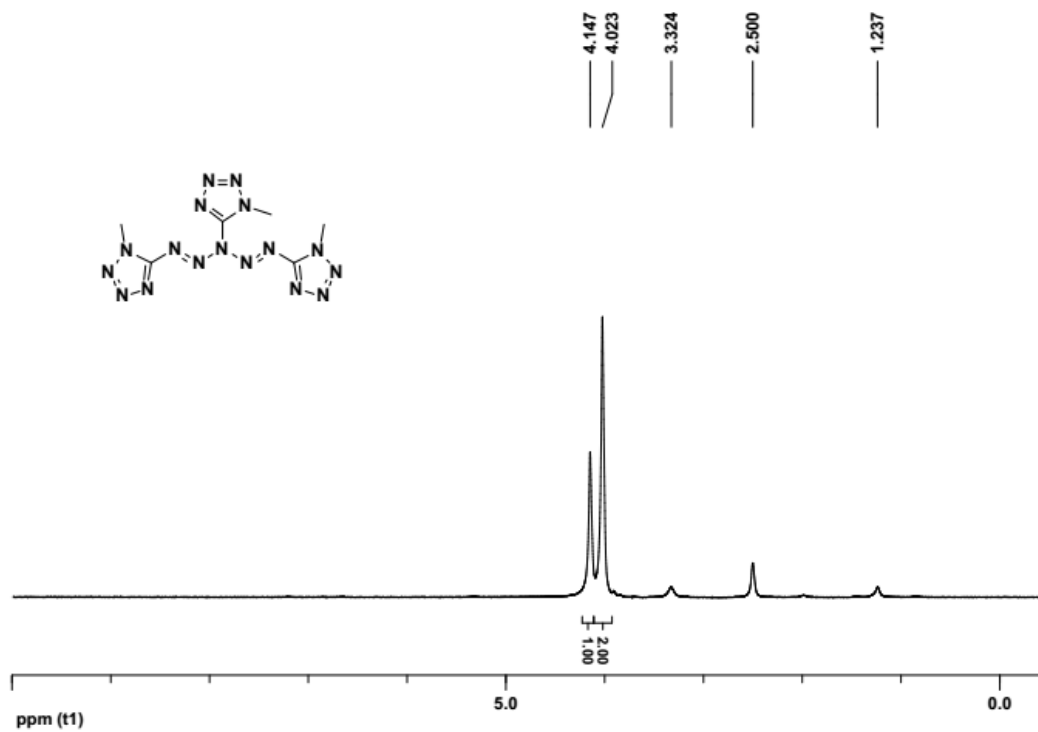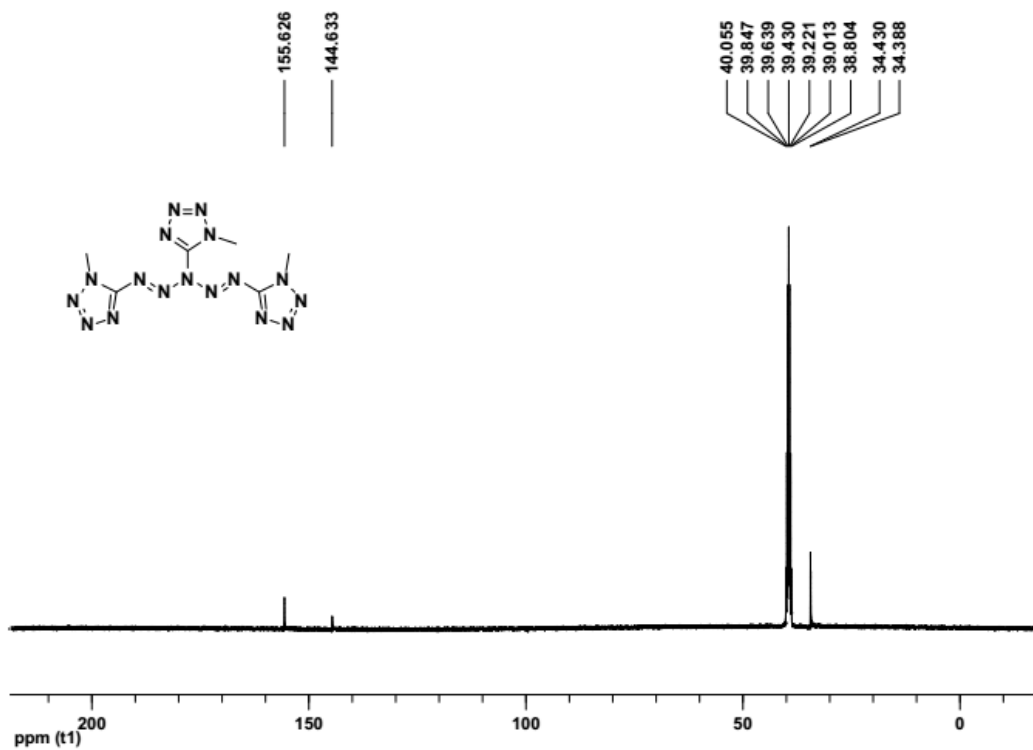



# DSC

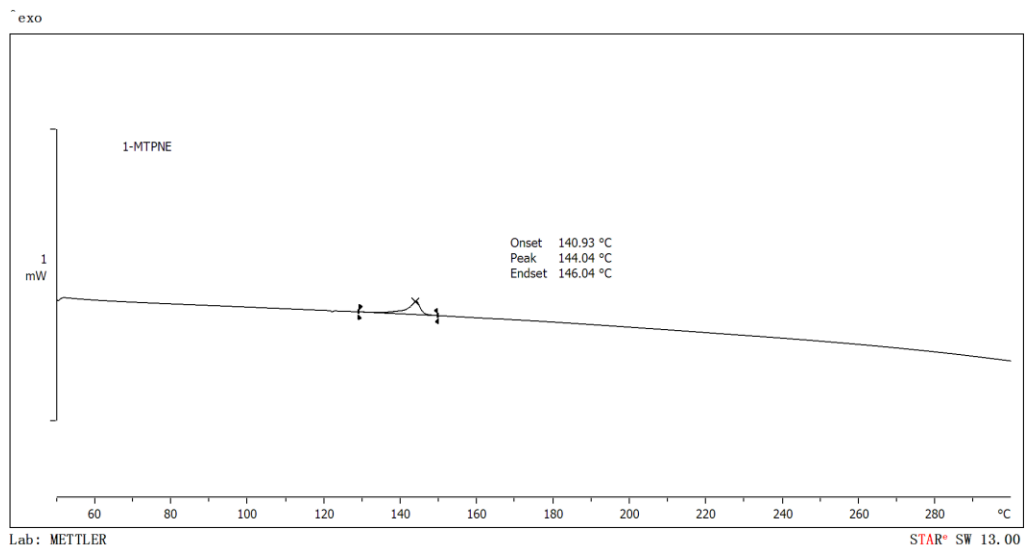

# Infrared

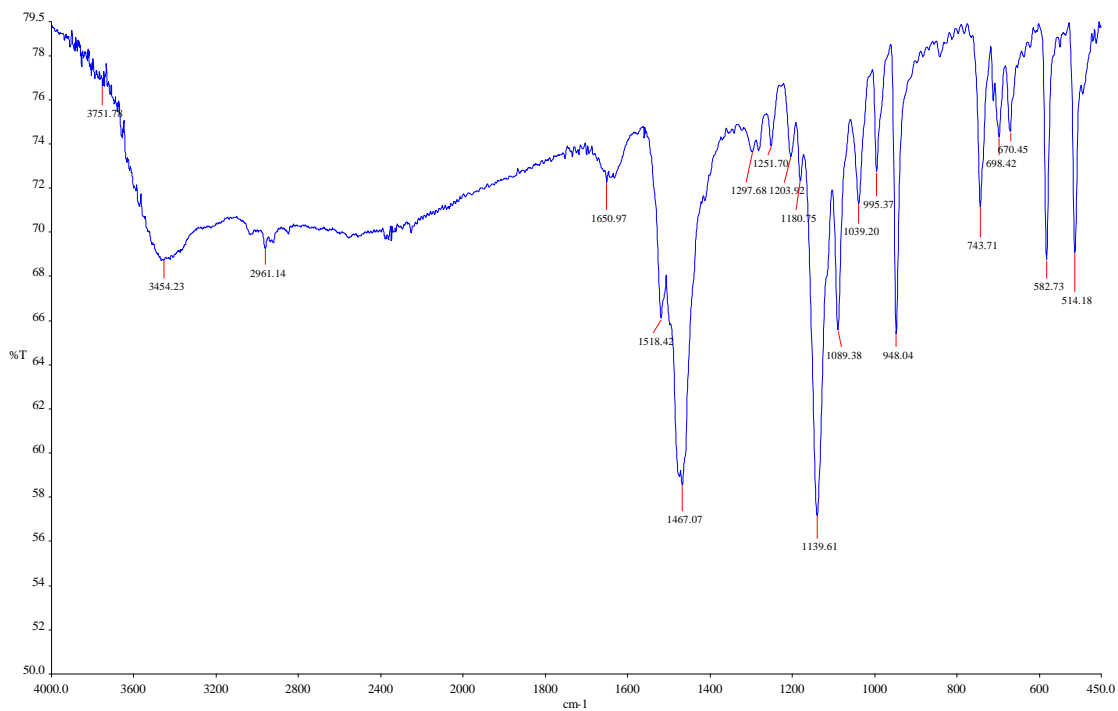

# HRMS

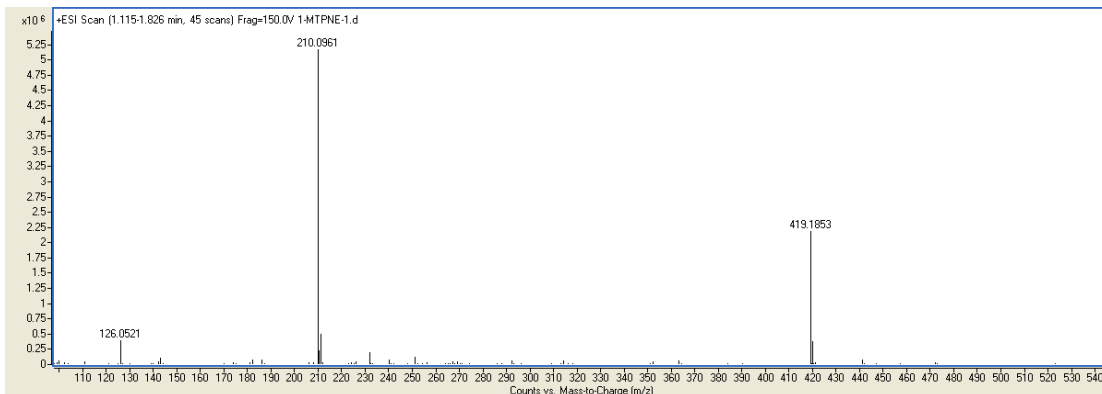

When R'-N=C=N-R'' was EDCI, the molecular weight of **3a** and **4a** was observed in HRMS.

### HRMS of **3a**

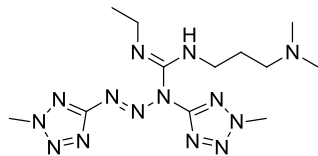

calc.: 365.2381; found: 365.2374

WQ#174 RT: 0.78 AV: 1 NL: 1.65E8  
T: FTMS + p ESI Full ms [50.00-750.00]

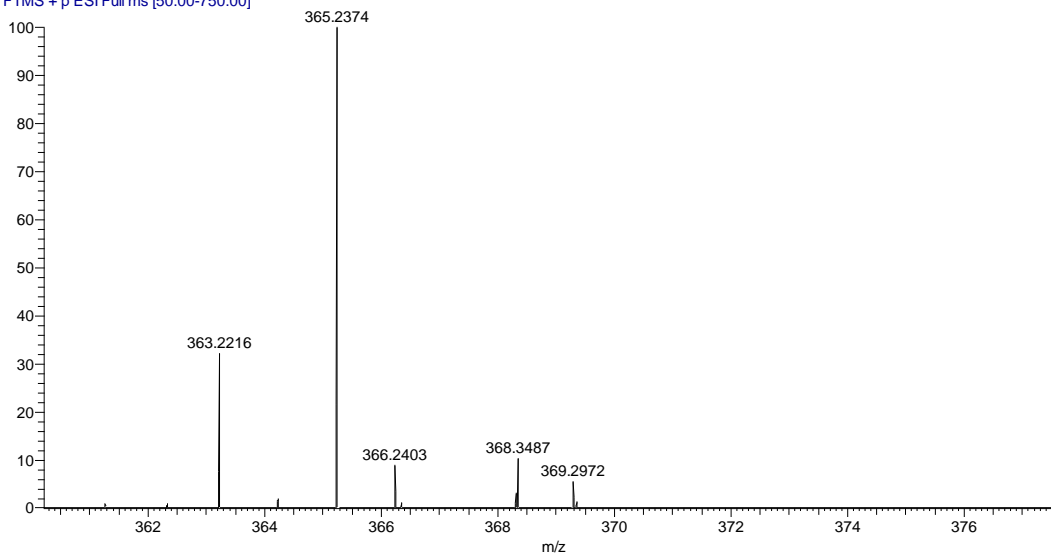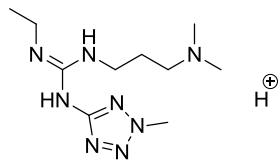

calc.: 255.2040; found: 255.2033

### HRMS of **4a**

WQ#170 RT: 0.76 AV: 1 NL: 8.48E9  
T: FTMS + p ESI Full ms [50.00-750.00]

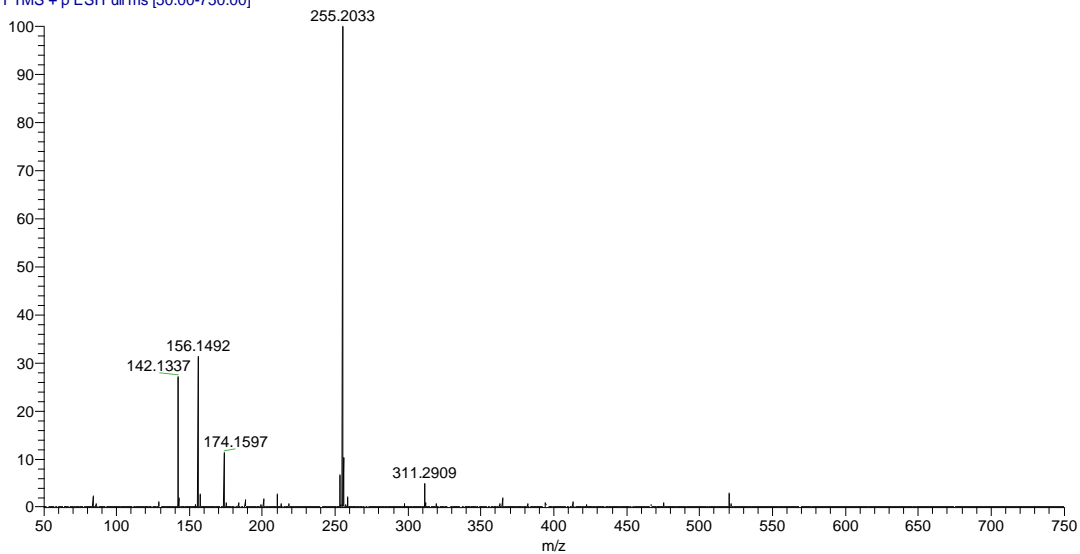

# Spectral data of 5

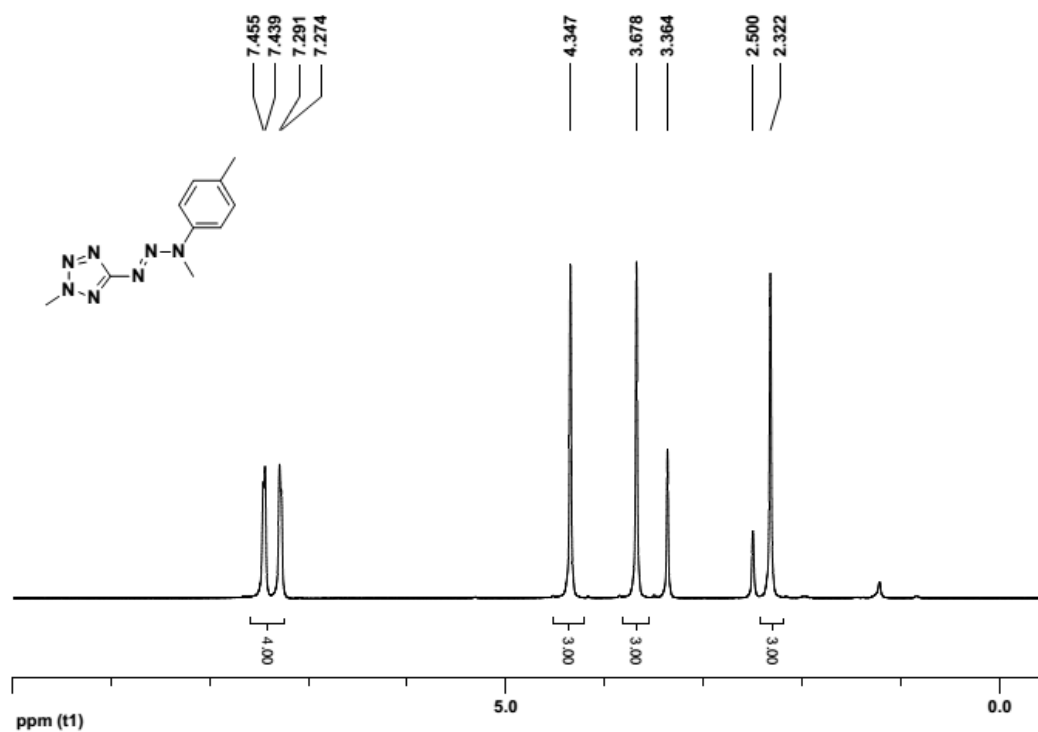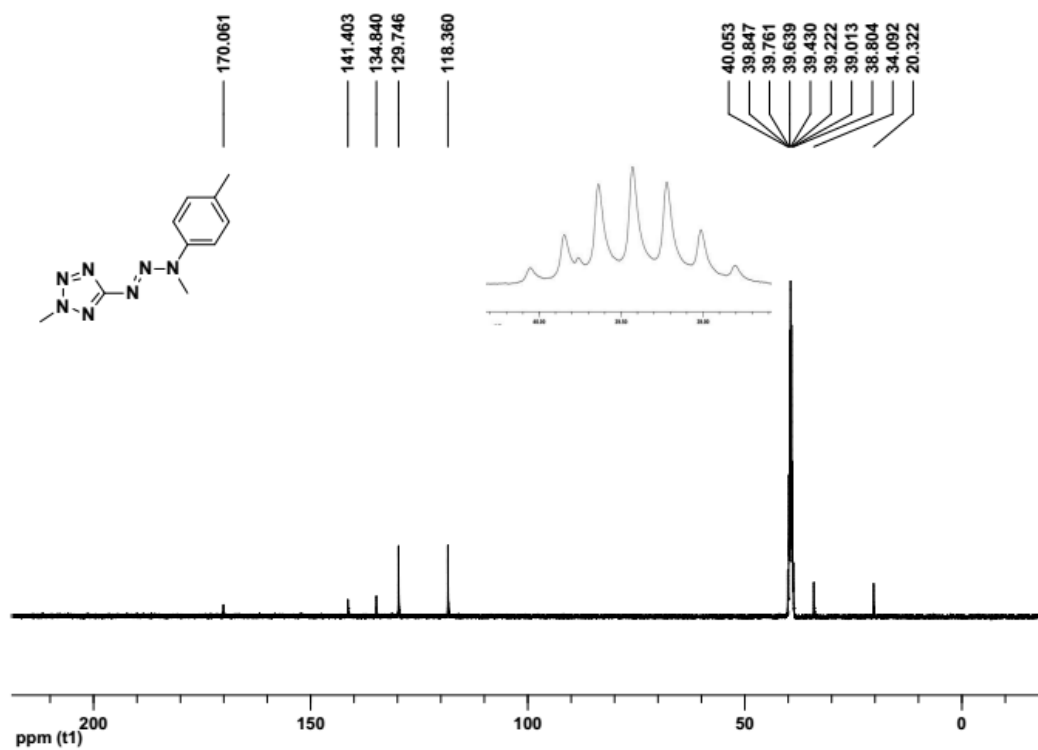

# Infrared

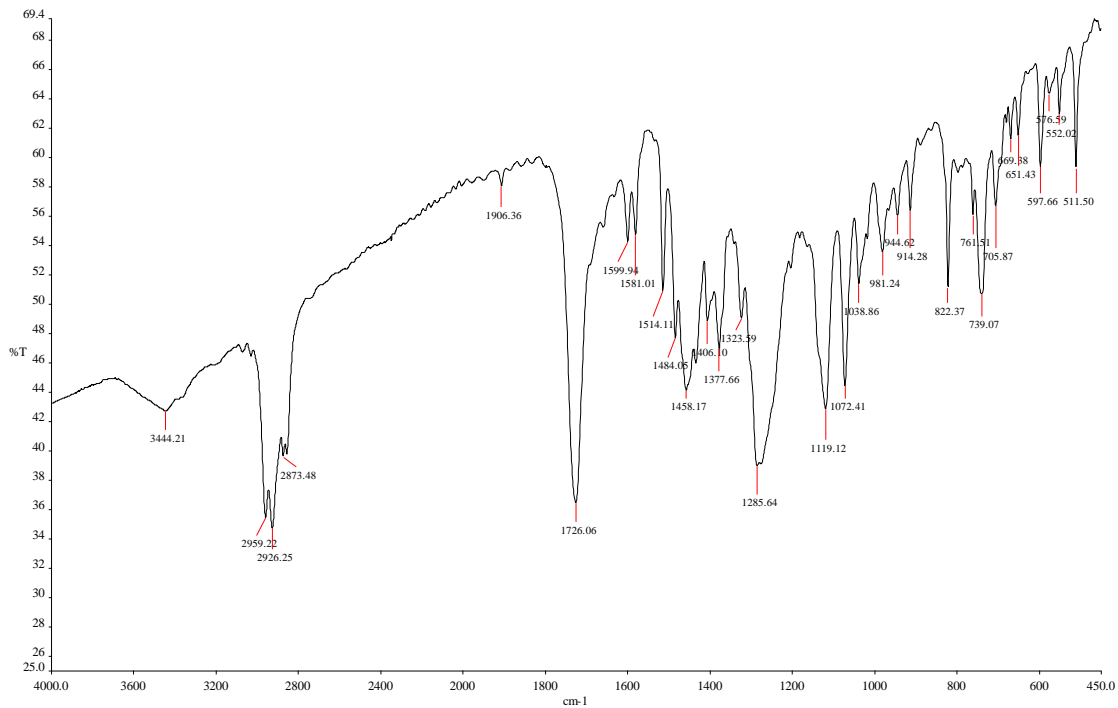

# HRMS

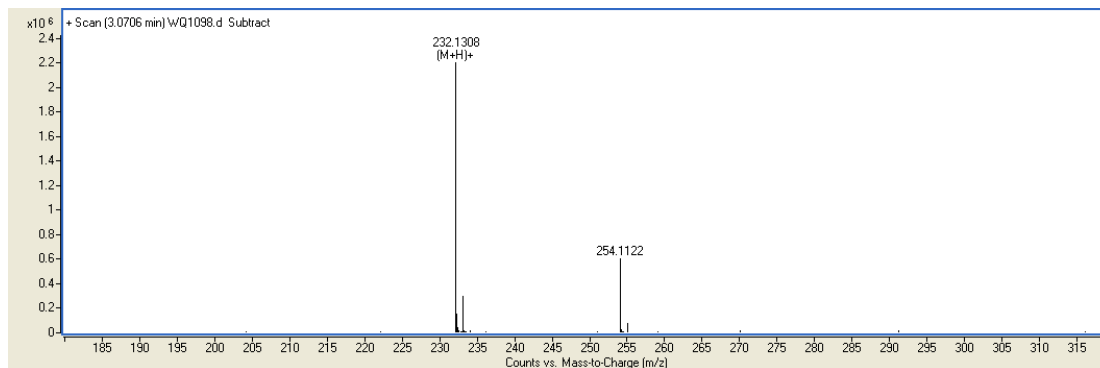

# Spectral data of 6

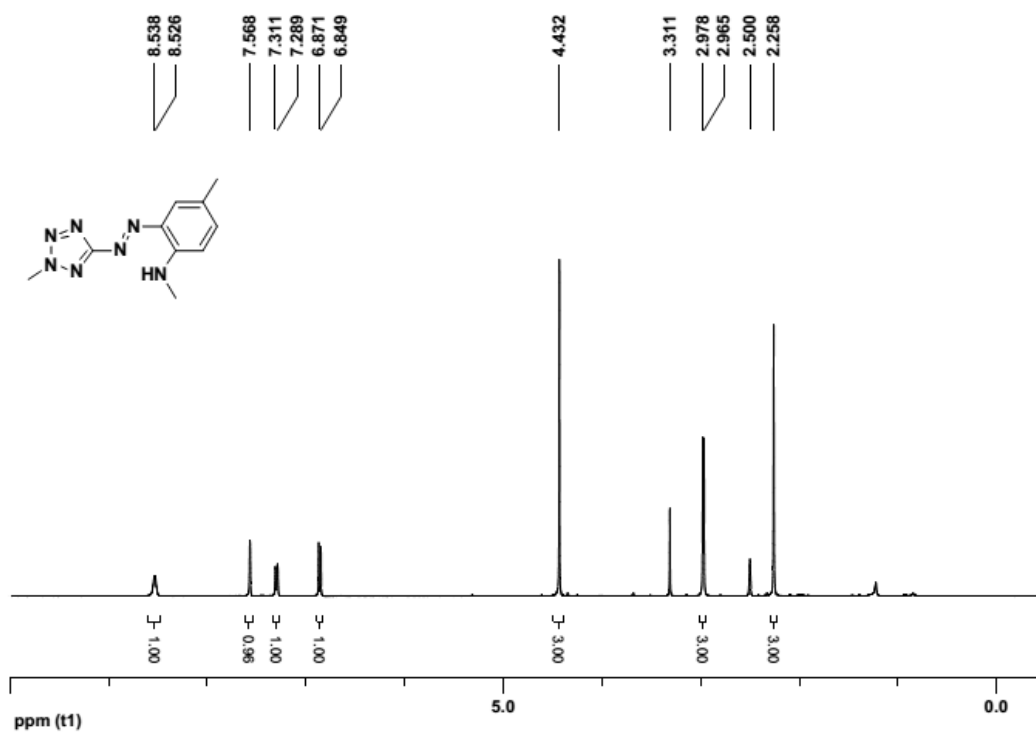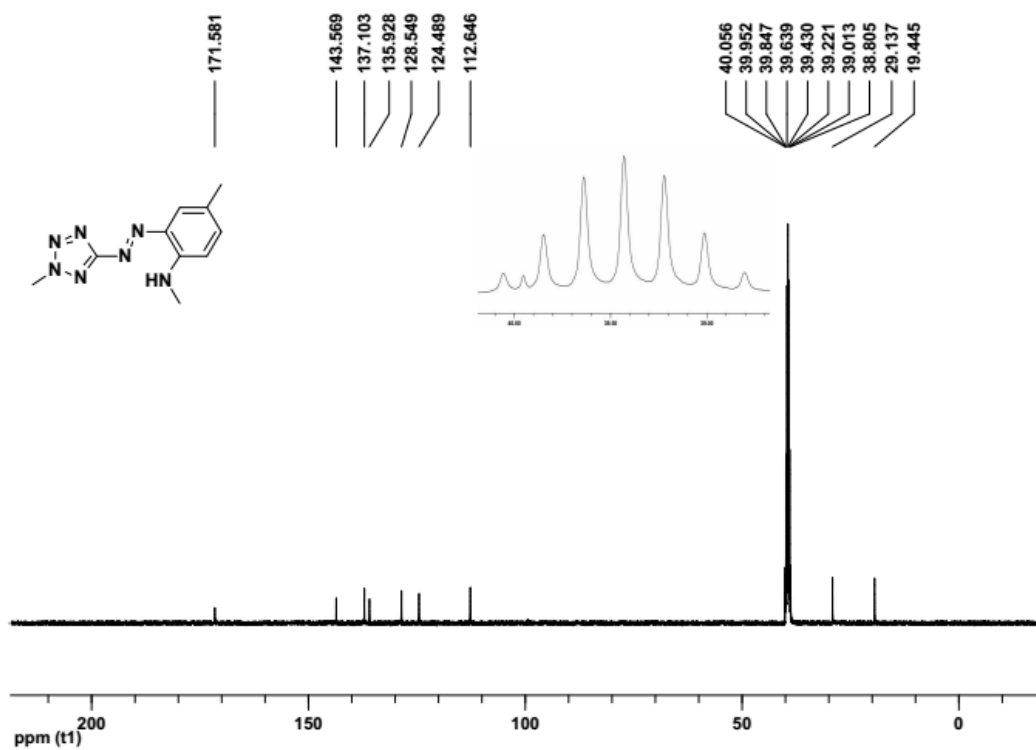

# Infrared

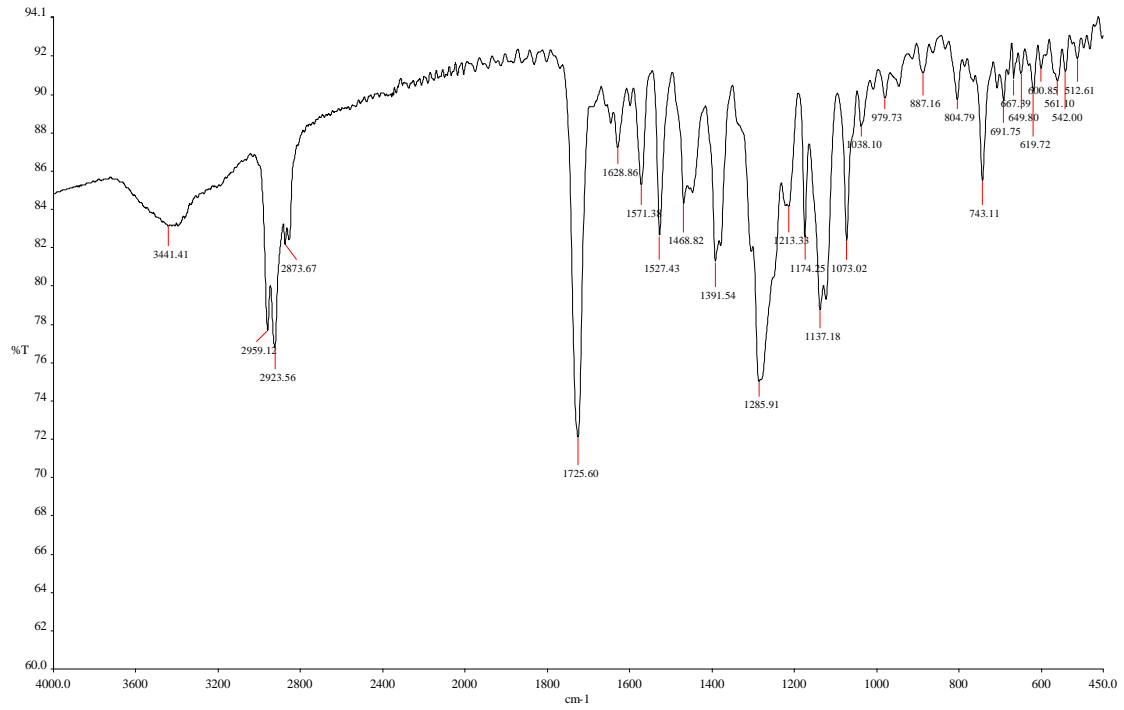

# HRMS

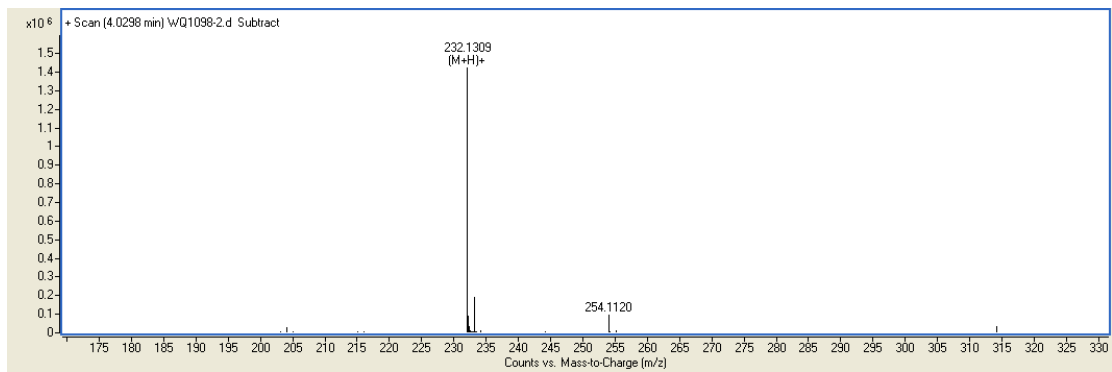

**Table S3.** Crystal data and structure refinement for **2a**.

|                                   |                                                                                                        |
|-----------------------------------|--------------------------------------------------------------------------------------------------------|
| Identification code               | <b>2a</b>                                                                                              |
| CCDC deposition number            | 1499749                                                                                                |
| Empirical formula                 | C <sub>6</sub> H <sub>9</sub> N <sub>17</sub>                                                          |
| Formula weight                    | 319.30                                                                                                 |
| Temperature                       | 153.15 K                                                                                               |
| Wavelength                        | 0.71073 Å                                                                                              |
| Crystal system, space group       | monoclinic, P2 <sub>1</sub> /c                                                                         |
| Unit cell dimensions              | a = 15.804(3) Å    α = 90.00 °<br>b = 10.785(2) Å    β = 99.10(3) °<br>c = 8.1924(16) Å    γ = 90.00 ° |
| Volume                            | 1378.8(5) Å <sup>3</sup>                                                                               |
| Z                                 | 4                                                                                                      |
| Calculated density                | 1.538 g/cm <sup>3</sup>                                                                                |
| Absorption coefficient            | 0.118 mm <sup>-1</sup>                                                                                 |
| F(000)                            | 656                                                                                                    |
| Crystal size                      | 0.16 x 0.05 x 0.04 mm                                                                                  |
| Theta range for data collection   | 2.6 to 50 °                                                                                            |
| Limiting indices                  | -17<=h<=18, -12<=k<=12, -9<=l<=8                                                                       |
| Reflections collected / unique    | 8237 / 2410 [R <sub>int</sub> = 0.0675]                                                                |
| Absorption correction             | Multi-scan                                                                                             |
| Refinement method                 | Full-matrix least-squares on F <sup>2</sup>                                                            |
| Data / restraints / parameters    | 2410 / 0 / 211                                                                                         |
| Goodness-of-fit on F <sup>2</sup> | 1.205                                                                                                  |
| Final R indices [I>2σ(I)]         | R <sub>1</sub> = 0.1663, wR <sub>2</sub> = 0.4342                                                      |
| R indices (all data)              | R <sub>1</sub> = 0.1853, wR <sub>2</sub> = 0.4465                                                      |
| Largest diff. peak and hole       | 0.812 and -0.543 e.Å <sup>-3</sup>                                                                     |

**Table S4.** Atomic coordinates ( $\times 10^4$ ) and equivalent isotropic displacement parameters ( $\text{\AA}^2 \times 10^3$ ) for **2a**.  $U(\text{eq})$  is defined as one third of the trace of the orthogonalized  $U^{ij}$  tensor.

|       | x       | y         | z         | $U(\text{eq})$ |
|-------|---------|-----------|-----------|----------------|
| N(1)  | 940(5)  | 8692(7)   | -850(10)  | 26(19)         |
| N(2)  | 489(5)  | 9252(7)   | -2176(11) | 27 (19)        |
| N(3)  | 441(6)  | 10464(8)  | -2029(10) | 30(2)          |
| N(4)  | 868(5)  | 10752(7)  | -559(10)  | 27(19)         |
| N(5)  | 1651(6) | 9633(8)   | 1715(10)  | 28(2)          |
| N(6)  | 1896(5) | 8557(8)   | 2110(10)  | 27(2)          |
| N(7)  | 2394(5) | 8522(8)   | 3633(10)  | 27(2)          |
| N(8)  | 2754(5) | 7364(7)   | 3907(10)  | 27(2)          |
| N(9)  | 3304(5) | 7329(7)   | 5223(11)  | 27(2)          |
| N(10) | 3294(7) | 5075(8)   | 4718(14)  | 46(3)          |
| N(11) | 3770(6) | 4161(8)   | 5375(13)  | 40(2)          |
| N(12) | 4359(5) | 4661(8)   | 6540(10)  | 26 (19)        |
| N(13) | 4289(6) | 5887(8)   | 6658(11)  | 32(2)          |
| N(14) | 3399(6) | 10154(8)  | 4674(13)  | 35(2)          |
| N(15) | 3371(6) | 11121(8)  | 5630(12)  | 32(2)          |
| N(16) | 2606(6) | 11108(7)  | 6110(10)  | 27(19)         |
| N(17) | 2109(6) | 10152(8)  | 5475(11)  | 33(2)          |
| C(1)  | 101(8)  | 8575(10)  | -3626(15) | 41(3)          |
| C(2)  | 1154(6) | 9650(9)   | 111(12)   | 24(2)          |
| C(3)  | 3619(6) | 6105(10)  | 5481(13)  | 28(2)          |
| C(4)  | 4964(8) | 3886(11)  | 7590(17)  | 44(3)          |
| C(5)  | 2643(6) | 9586(9)   | 4621(13)  | 28(2)          |
| C(6)  | 2325(7) | 12080(10) | 7139(12)  | 30(2)          |



**Table S5.** Bond lengths [ $\text{\AA}$ ] and angles [ $^\circ$ ] for **2a**.

---

|                   |           |                   |           |
|-------------------|-----------|-------------------|-----------|
| N(1)-N(2)         | 1.345(11) | N(1)-C(2)         | 1.311(13) |
| N(2)-N(3)         | 1.317(11) | N(2)-C(1)         | 1.445(14) |
| N(3)-N(4)         | 1.321(12) | N(4)-C(2)         | 1.356(13) |
| N(5)-N(6)         | 1.250(12) | N(5)-C(2)         | 1.420(13) |
| N(6)-N(7)         | 1.366(11) | N(7)-N(8)         | 1.376(11) |
| N(7)-C(5)         | 1.424(13) | N(8)-N(9)         | 1.273(12) |
| N(9)-C(3)         | 1.415(13) | N(10)-N(11)       | 1.303(13) |
| N(10)-C(3)        | 1.337(14) | N(11)-N(12)       | 1.337(13) |
| N(12)-N(13)       | 1.332(12) | N(12)-C(4)        | 1.446(14) |
| N(13)-C(3)        | 1.336(13) | N(14)-N(15)       | 1.309(13) |
| N(14)-C(5)        | 1.337(14) | N(15)-N(16)       | 1.329(12) |
| N(16)-N(17)       | 1.350(12) | N(16)-C(6)        | 1.458(12) |
| N(17)-C(5)        | 1.327(14) | C(1)-H(1A)        | 0.9800    |
| C(1)-H(1B)        | 0.9800    | C(1)-H(1C)        | 0.9800    |
| C(4)-H(4A)        | 0.9800    | C(4)-H(4B)        | 0.9800    |
| C(4)-H(4C)        | 0.9800    | C(6)-H(6A)        | 0.9800    |
| C(6)-H(6B)        | 0.9800    | C(6)-H(6C)        | 0.9800    |
| <hr/>             |           |                   |           |
| C(2)-N(1)-N(2)    | 100.7(8)  | N(1)-N(2)-C(1)    | 122.6(8)  |
| N(3)-N(2)-N(1)    | 113.8(8)  | N(3)-N(2)-C(1)    | 123.6(9)  |
| N(2)-N(3)-N(4)    | 106.7(8)  | N(3)-N(4)-C(2)    | 104.7(8)  |
| N(6)-N(5)-C(2)    | 110.8(8)  | N(5)-N(6)-N(7)    | 111.9(8)  |
| N(6)-N(7)-N(8)    | 109.7(8)  | N(6)-N(7)-C(5)    | 124.3(8)  |
| N(8)-N(7)-C(5)    | 124.7(8)  | N(9)-N(8)-N(7)    | 112.0(8)  |
| N(8)-N(9)-C(3)    | 109.3(8)  | N(11)-N(10)-C(3)  | 106.4(9)  |
| N(10)-N(11)-N(12) | 106.3(9)  | N(11)-N(12)-C(4)  | 120.8(9)  |
| N(13)-N(12)-N(11) | 113.3(8)  | N(13)-N(12)-C(4)  | 125.8(9)  |
| N(12)-N(13)-C(3)  | 100.8(8)  | N(15)-N(14)-C(5)  | 105.7(9)  |
| N(14)-N(15)-N(16) | 106.7(8)  | N(15)-N(16)-N(17) | 113.3(8)  |
| N(15)-N(16)-C(6)  | 122.6(8)  | N(17)-N(16)-C(6)  | 124.0(9)  |
| C(5)-N(17)-N(16)  | 100.1(8)  | N(2)-C(1)-H(1A)   | 109.5     |
| N(2)-C(1)-H(1B)   | 109.5     | N(2)-C(1)-H(1C)   | 109.5     |
| H(1A)-C(1)-H(1B)  | 109.5     | H(1A)-C(1)-H(1C)  | 109.5     |

---

---

|                  |          |                  |          |
|------------------|----------|------------------|----------|
| H(1B)-C(1)-H(1C) | 109.5    | N(1)-C(2)-N(4)   | 114.2(9) |
| N(1)-C(2)-N(5)   | 126.7(9) | N(4)-C(2)-N(5)   | 119.1(9) |
| N(10)-C(3)-N(9)  | 127.3(9) | N(13)-C(3)-N(9)  | 119.5(9) |
| N(13)-C(3)-N(10) | 113.1(9) | N(12)-C(4)-H(4A) | 109.5    |
| N(12)-C(4)-H(4B) | 109.5    | N(12)-C(4)-H(4C) | 109.5    |
| H(4A)-C(4)-H(4B) | 109.5    | H(4A)-C(4)-H(4C) | 109.5    |
| H(4B)-C(4)-H(4C) | 109.5    | N(14)-C(5)-N(7)  | 123.6(9) |
| N(17)-C(5)-N(7)  | 121.9(9) | N(17)-C(5)-N(14) | 114.3(9) |
| N(16)-C(6)-H(6A) | 109.5    | N(16)-C(6)-H(6B) | 109.5    |
| N(16)-C(6)-H(6C) | 109.5    | H(6A)-C(6)-H(6B) | 109.5    |
| H(6A)-C(6)-H(6C) | 109.5    | H(6B)-C(6)-H(6C) | 109.5    |

---

**Table S6.** Anisotropic displacement parameters ( $\text{\AA}^2 \times 10^3$ ) for **2a**. The anisotropic displacement factor exponent takes the form:  $-2\pi^2 [h^2 a^{*2} U^{11} + \dots + 2 h k a^* b^* U^{12}]$ .

|       | U11   | U22   | U33   | U23   | U13    | U12   |
|-------|-------|-------|-------|-------|--------|-------|
| N(1)  | 33(5) | 18(4) | 25(4) | -2(3) | 5(4)   | 0(3)  |
| N(2)  | 32(5) | 16(4) | 32(5) | 4(4)  | 1(4)   | 0(4)  |
| N(3)  | 36(5) | 24(5) | 28(4) | 2(4)  | 1(4)   | 1(4)  |
| N(4)  | 32(5) | 19(4) | 31(5) | -1(4) | 5(4)   | -1(4) |
| N(5)  | 35(5) | 22(4) | 26(4) | -5(4) | 4(4)   | -1(4) |
| N(6)  | 30(5) | 23(4) | 27(4) | 0(4)  | 3(4)   | 3(4)  |
| N(7)  | 30(5) | 23(4) | 24(4) | -5(3) | -1(4)  | 3(4)  |
| N(8)  | 32(5) | 14(4) | 34(5) | 9(4)  | 3(4)   | 7(3)  |
| N(9)  | 28(4) | 17(4) | 36(5) | 1(4)  | 8(4)   | -2(3) |
| N(10) | 51(6) | 13(4) | 68(7) | -6(4) | -10(6) | 2(4)  |
| N(11) | 45(6) | 21(5) | 55(6) | 9(4)  | 6(5)   | 7(4)  |
| N(12) | 20(4) | 29(5) | 31(5) | 3(4)  | 7(3)   | -2(4) |
| N(13) | 34(5) | 28(5) | 35(5) | -3(4) | 5(4)   | 5(4)  |
| N(14) | 34(5) | 23(5) | 51(6) | 2(4)  | 10(4)  | 1(4)  |
| N(15) | 33(5) | 20(4) | 45(5) | -3(4) | 11(4)  | -8(4) |
| N(16) | 42(5) | 14(4) | 24(4) | -1(3) | 4(4)   | -1(4) |
| N(17) | 39(5) | 21(4) | 37(5) | -1(4) | -1(4)  | -1(4) |
| C(1)  | 56(7) | 19(5) | 43(7) | -9(5) | -5(6)  | 0(5)  |
| C(2)  | 22(5) | 25(5) | 27(5) | -1(4) | 10(4)  | 3(4)  |
| C(3)  | 24(5) | 25(5) | 35(6) | 2(4)  | 6(4)   | 3(4)  |
| C(4)  | 40(6) | 34(6) | 55(7) | -4(6) | 0(6)   | 20(5) |
| C(5)  | 31(5) | 12(5) | 41(6) | 0(4)  | 3(5)   | 5(4)  |
| C(6)  | 36(6) | 26(5) | 26(5) | -8(4) | 5(5)   | 10(4) |

**Table S7.** Hydrogen coordinates ( $\times 10^4$ ) and isotropic displacement parameters ( $\text{\AA}^2 \times 10^3$ ) for **2a**.

|       | x    | y     | z     | U(eq) |
|-------|------|-------|-------|-------|
| H(1A) | 534  | 8405  | -4330 | 61    |
| H(1B) | -362 | 9072  | -4242 | 61    |
| H(1C) | -132 | 7791  | -3288 | 61    |
| H(4A) | 4937 | 4074  | 8752  | 66    |
| H(4B) | 5544 | 4048  | 7362  | 66    |
| H(4C) | 4819 | 3012  | 7369  | 66    |
| H(6A) | 2265 | 11736 | 8223  | 44    |
| H(6B) | 1771 | 12407 | 6605  | 44    |
| H(6C) | 2748 | 12751 | 7281  | 44    |

**Table S8.** Torsion angles [ ° ] for **2a**.

---

|                         |            |                         |            |
|-------------------------|------------|-------------------------|------------|
| N(1)-N(2)-N(3)-N(4)     | -0.3(12)   | N(2)-N(1)-C(2)-N(4)     | -0.7(11)   |
| N(2)-N(1)-C(2)-N(5)     | -179.5(9)  | N(2)-N(3)-N(4)-C(2)     | -0.2(10)   |
| N(3)-N(4)-C(2)-N(1)     | 0.6(11)    | N(3)-N(4)-C(2)-N(5)     | 179.5(8)   |
| N(5)-N(6)-N(7)-N(8)     | -170.8(8)  | N(5)-N(6)-N(7)-C(5)     | -3.1(13)   |
| N(6)-N(5)-C(2)-N(1)     | 2.0(14)    | N(6)-N(5)-C(2)-N(4)     | -176.8(9)  |
| N(6)-N(7)-N(8)-N(9)     | 172.1(8)   | N(6)-N(7)-C(5)-N(14)    | -97.3(12)  |
| N(6)-N(7)-C(5)-N(17)    | 77.6(13)   | N(7)-N(8)-N(9)-C(3)     | 177.1(8)   |
| N(8)-N(7)-C(5)-N(14)    | 68.7(14)   | N(8)-N(7)-C(5)-N(17)    | -116.5(11) |
| N(8)-N(9)-C(3)-N(10)    | -13.0(15)  | N(8)-N(9)-C(3)-N(13)    | 170.6(9)   |
| N(10)-N(11)-N(12)-N(13) | -0.6(12)   | N(10)-N(11)-N(12)-C(4)  | 176.1(10)  |
| N(11)-N(10)-C(3)-N(9)   | -178.0(10) | N(11)-N(10)-C(3)-N(13)  | -1.5(14)   |
| N(11)-N(12)-N(13)-C(3)  | -0.3(11)   | N(12)-N(13)-C(3)-N(9)   | 177.9(9)   |
| N(12)-N(13)-C(3)-N(10)  | 1.1(12)    | N(14)-N(15)-N(16)-N(17) | -0.8(12)   |
| N(14)-N(15)-N(16)-C(6)  | -177.3(9)  | N(15)-N(14)-C(5)-N(7)   | 176.5(9)   |
| N(15)-N(14)-C(5)-N(17)  | 1.3(13)    | N(15)-N(16)-N(17)-C(5)  | 1.5(11)    |
| N(16)-N(17)-C(5)-N(7)   | -176.9(9)  | N(16)-N(17)-C(5)-N(14)  | -1.7(12)   |
| C(1)-N(2)-N(3)-N(4)     | -179.8(10) | C(2)-N(1)-N(2)-N(3)     | 0.6(11)    |
| C(2)-N(1)-N(2)-C(1)     | -179.9(10) | C(2)-N(5)-N(6)-N(7)     | 178.5(8)   |
| C(3)-N(10)-N(11)-N(12)  | 1.2(13)    | C(4)-N(12)-N(13)-C(3)   | -176.7(10) |
| C(5)-N(7)-N(8)-N(9)     | 4.4(13)    | C(5)-N(14)-N(15)-N(16)  | -0.3(11)   |
| C(6)-N(16)-N(17)-C(5)   | 177.9(9)   |                         |            |

---

## Computation details

The heats of formation of **2a-2j** were carried out by using the Gaussian09 (Revision B.01) suite of programs based on isodesmic reactions (Scheme S2).<sup>4</sup> The elementary geometric optimization and the frequency analysis were performed at the level of B3LYP/6-311+G\*\*. The total energy was performed at the level of MP2/6-311++G\*\*.

**Scheme S2.** Isodesmic reactions for the calculation of heats of formation.

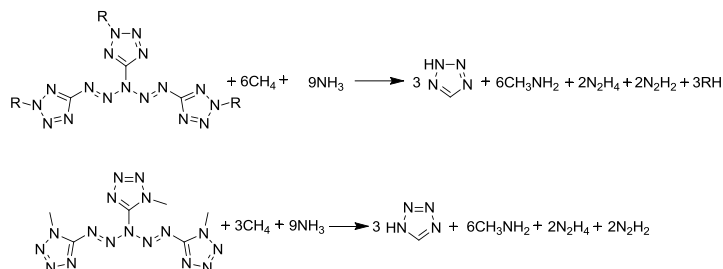

**Table S9.** Calculated (B3LYP/6-31+G\*\*//MP2/6-311++G\*\*) total energy ( $E_0$ ), Zero-Point Energy (ZPE), values of thermal correction ( $H_T$ ), and heats of formation (HOF) of **2a** and **2j**.

| Name                            | $E_0$ (a.u.) | ZPE (a.u.) | $H_T$ (a.u.) | HOF (kJ mol <sup>-1</sup> ) |
|---------------------------------|--------------|------------|--------------|-----------------------------|
| <b>2a</b>                       | -1161.953770 | 0.221028   | 0.021410     | 1699.2                      |
| <b>2b</b>                       | -1853.849328 | 0.465224   | 0.034320     | 1189.8                      |
| <b>2c</b>                       | -1393.897319 | 0.320857   | 0.027725     | 1059.3                      |
| <b>2d</b>                       | -1515.253398 | 0.473213   | 0.033226     | 550.6                       |
| <b>2e</b>                       | -8996.818310 | 0.279371   | 0.028024     | 871.5                       |
| <b>2f</b>                       | -1844.588827 | 0.349851   | 0.034265     | -77.7                       |
| <b>2g</b>                       | -1438.437752 | 0.217076   | 0.025914     | 1387.1                      |
| <b>2h</b>                       | -1276.245240 | 0.234925   | 0.023308     | 1174.5                      |
| <b>2i</b>                       | -1505.196037 | 0.320841   | 0.028920     | 311.2                       |
| <b>2j</b>                       | -1162.180333 | 0.219624   | 0.021818     | 1179.8                      |
| 2 <i>H</i> -tetrazole           | -257.706842  | 0.047597   | 0.004364     | 318.2 <sup>a</sup>          |
| 1 <i>H</i> -tetrazole           | -257.712578  | 0.046863   | 0.004429     | 327.4 <sup>a</sup>          |
| CH <sub>4</sub>                 | -40.396999   | 0.044793   | 0.003812     | -74.4 <sup>a</sup>          |
| NH <sub>3</sub>                 | -56.427034   | 0.034372   | 0.003818     | -46.0 <sup>a</sup>          |
| CH <sub>3</sub> NH <sub>2</sub> | -95.622396   | 0.064026   | 0.004375     | -22.5 <sup>b</sup>          |
| N <sub>2</sub> H <sub>4</sub>   | -111.609981  | 0.052611   | 0.003904     | 95.4 <sup>b</sup>           |
| N <sub>2</sub> H <sub>2</sub>   | -110.391652  | 0.028442   | 0.003802     | 211.9 <sup>c</sup>          |

<sup>a</sup>Chen, Z.; Xiao, H.; Song, W. *J. Mol. Struct. (Theochem)* **1999**, *460*, 167–173. <sup>b</sup>Zhang, X.; Zhu, W.; Wei, T.; Zhang, C.; Xiao, H. *J. Phys. Chem. C* **2010**, *114*, 13142–13152. <sup>c</sup>Gurvich, L. V.; Veyts, I. V.; Alcock, C. B. *Thermodynamic properties of individual substances*,

Hemisphere Pub. Co., New York, **1989**.

## References

- M. J. Frisch, et al., G. W. Trucks, H. B. Schlegel, G. E. Scuseria, M. A. Robb, J. R. Cheeseman, G. Scalmani, V. Barone, B. Mennucci, G. A. Petersson, H. Nakatsuji, M. Caricato, X. Li, H. P. Hratchian, A. F. Izmaylov, J. Bloino, G. Zheng, J. L. Sonnenberg, M. Hada, M. Ehara, K. Toyota, R. Fukuda, J. Hasegawa, M. Ishida, T. Nakajima, Y. Honda, O. Kitao, H. Nakai, T. Vreven, J. A. Montgomery, Jr., J. E. Peralta, F. Ogliaro, M. Bearpark, J. J. Heyd, E. Brothers, K. N. Kudin, V. N. Staroverov, R. Kobayashi, J. Normand, K. Raghavachari, A. Rendell, J. C. Burant, S. S. Iyengar, J. Tomasi, M. Cossi, N. Rega, J. M. Millam, M. Klene, J. E. Knox, J. B. Cross, V. Bakken, C. Adamo, J. Jaramillo, R. Gomperts, R. E. Stratmann, O. Yazyev, A. J. Austin, R. Cammi, C. Pomelli, J. W. Ochterski, R. L. Martin, K. Morokuma, V. G. Zakrzewski, G. A. Voth, P. Salvador, J. J. Dannenberg, S. Dapprich, A. D. Daniels, Ö. Farkas, J. B. Foresman, J. V. Ortiz, J. Cioslowski, D. J. Fox, *Gaussian 09, Revision B.01*, Gaussian, Inc., Wallingford CT, **2009**.
